# Supplementary material for: Characterisation of extracellular vesicle-subsets derived from brain endothelial cells and analysis of their protein cargo modulation after TNF exposure
Source: PubMed Central journal article supplement — J Extracell Vesicles. 2017 Apr 19;6(1):1302705. doi: 10.1080/20013078.2017.1302705 (PMC5405560; doi:10.1080/20013078.2017.1302705), 2017-04-19
Supplement: zjev_a_1302705_sm0480.pdf [file zjev_a_1302705_sm0480.pdf]

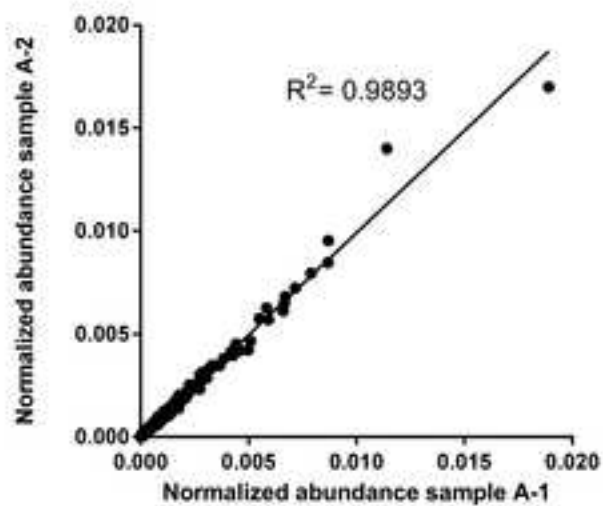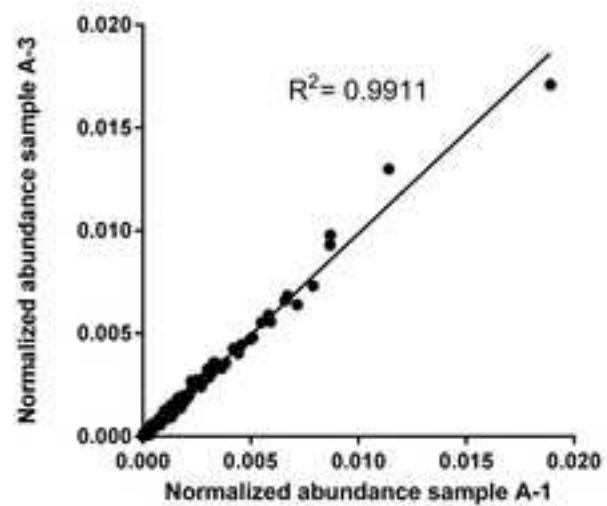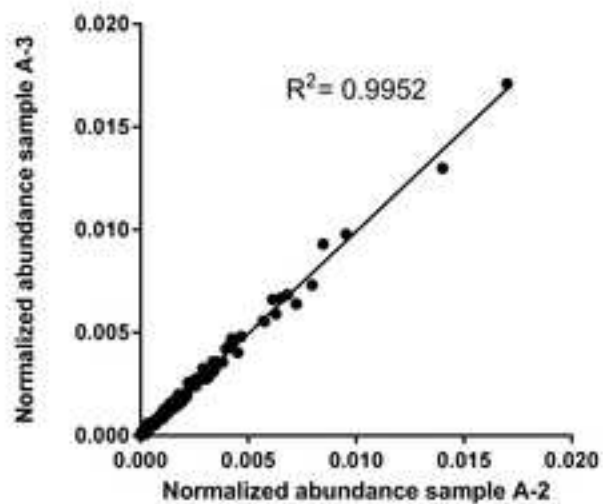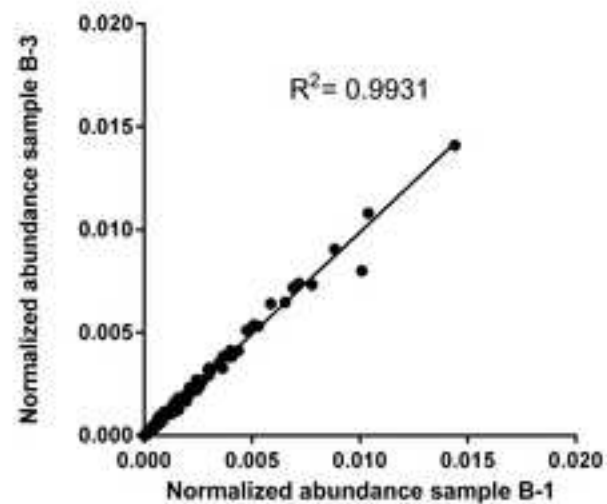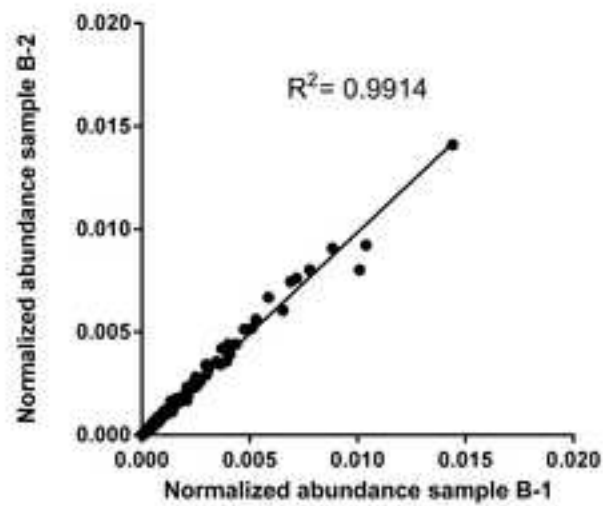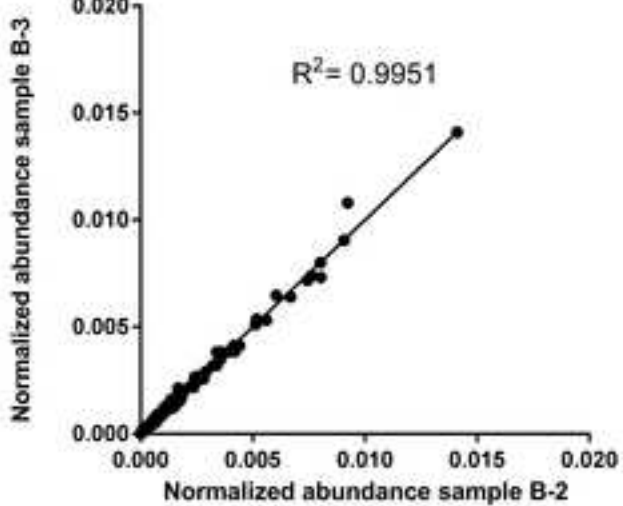

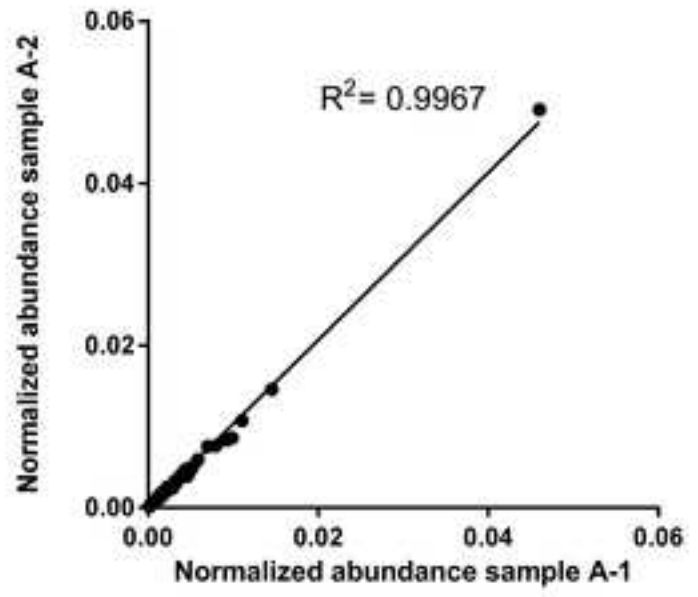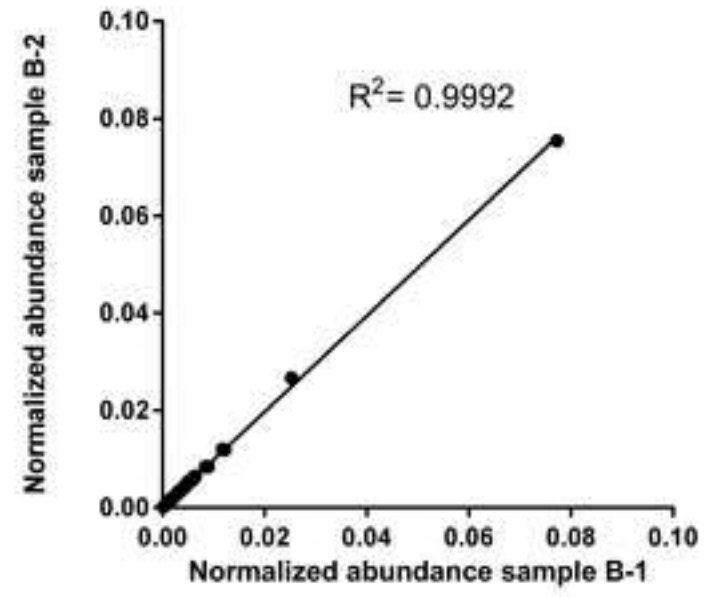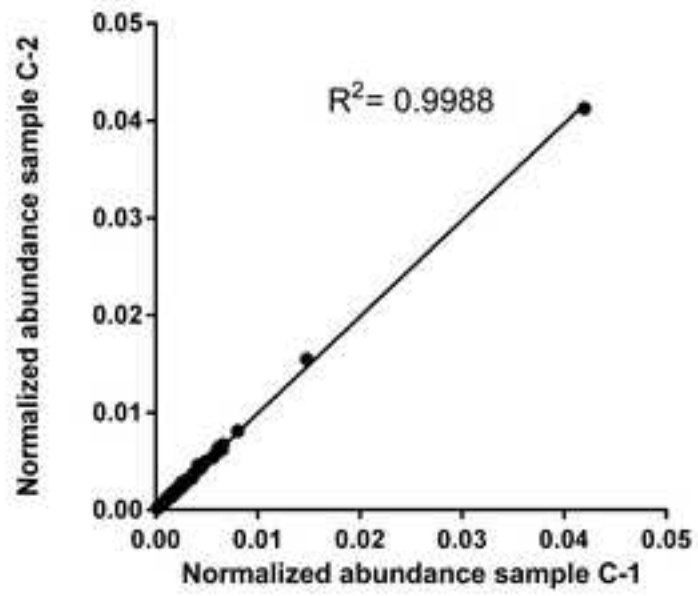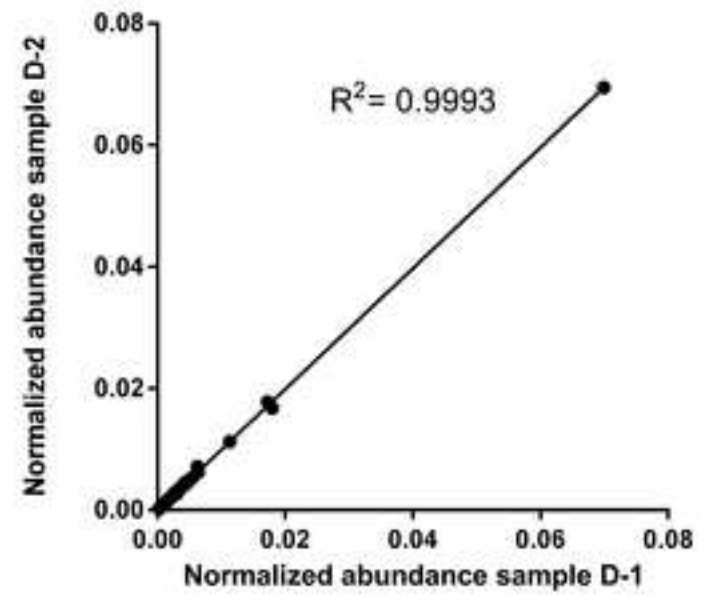

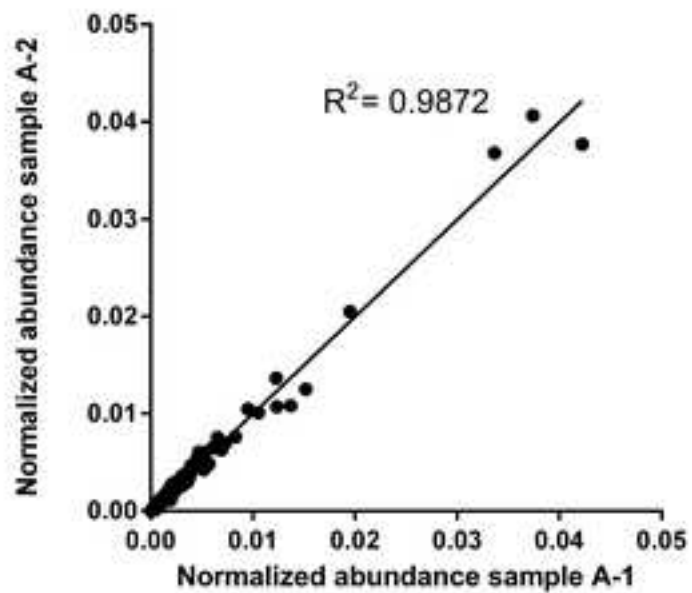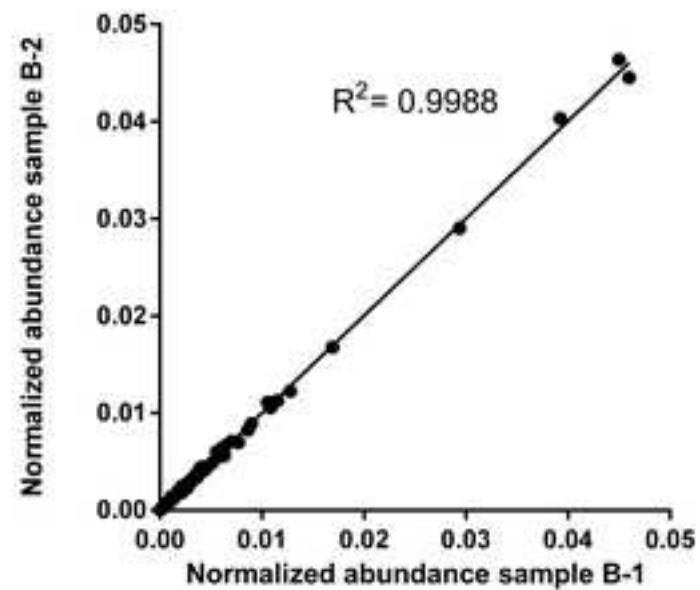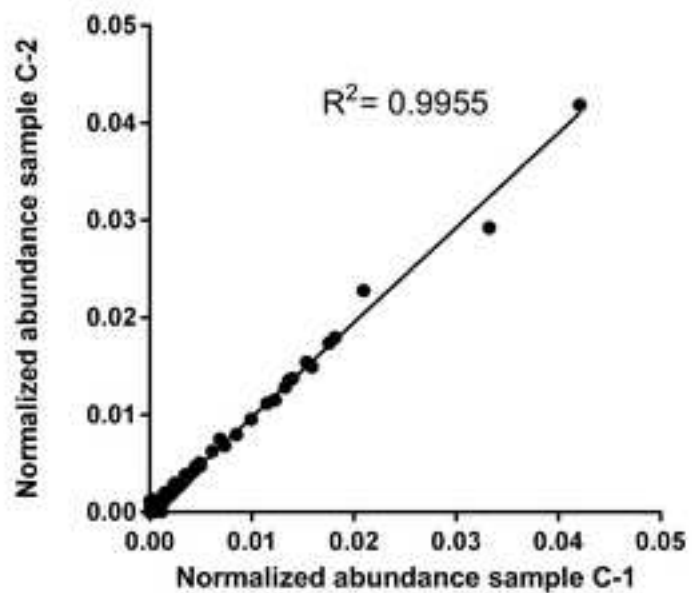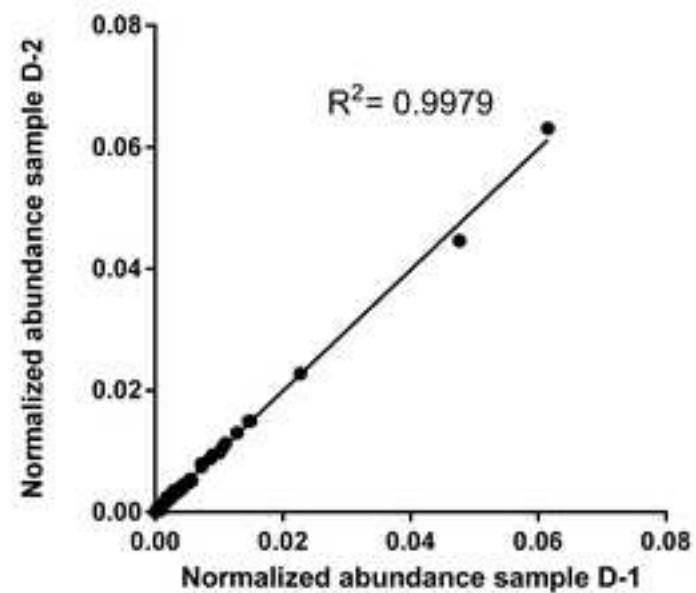

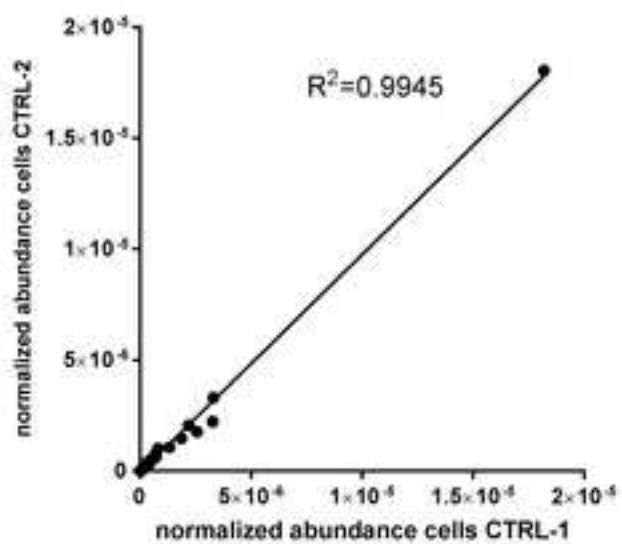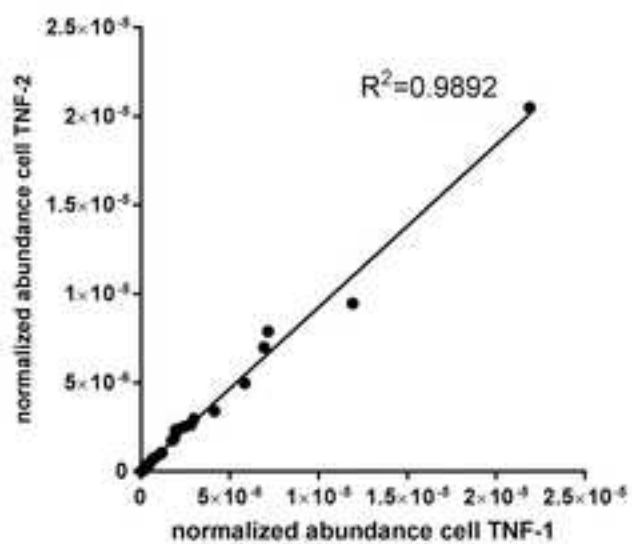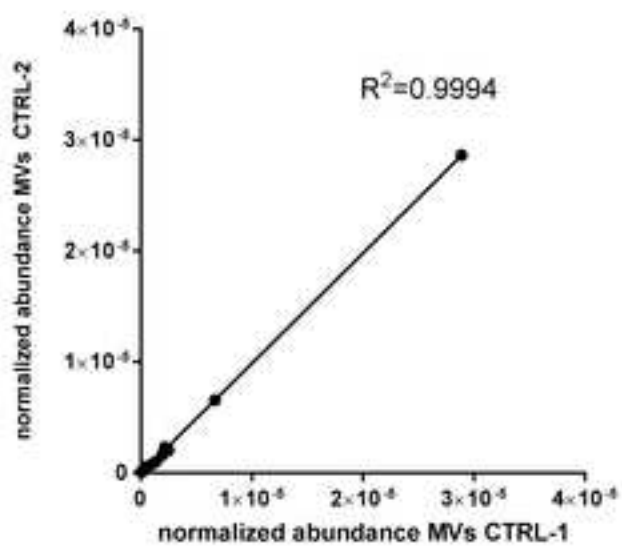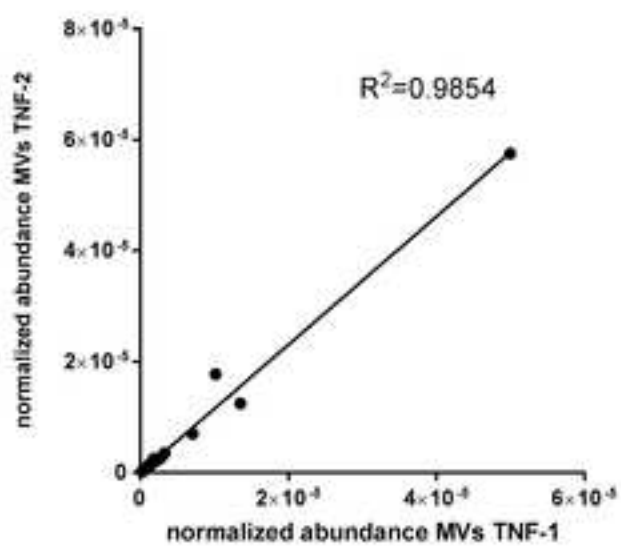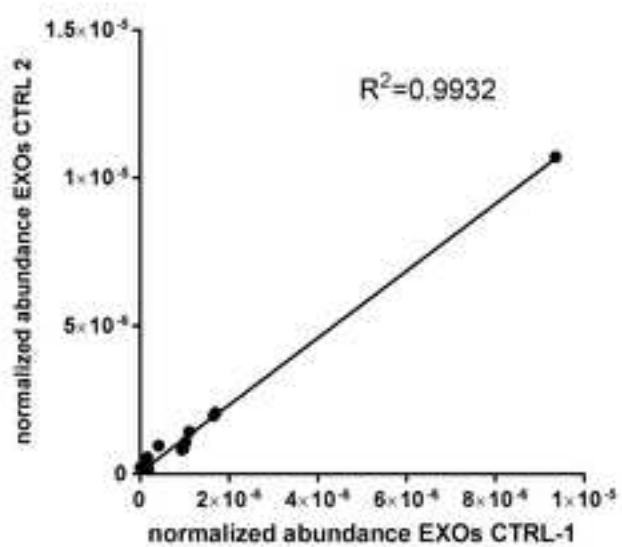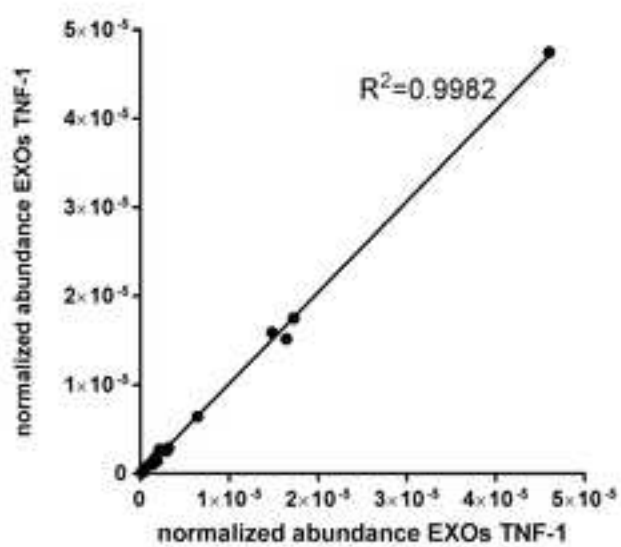

Supplementary Table 1.xlsx

| Accession    | Gene name | Description                                                                       | Identified in cells | Identified in MVs | Identified in EXOs |
|--------------|-----------|-----------------------------------------------------------------------------------|---------------------|-------------------|--------------------|
| 1433B_HUMAN  | YWHAB     | 14-3-3 protein beta/alpha                                                         | 0                   | 0                 | 0                  |
| 1433E_HUMAN  | YWHAE     | 14-3-3 protein epsilon                                                            | 0                   | 0                 | 0                  |
| 1433G_HUMAN  | YWHAG     | 14-3-3 protein gamma                                                              | 0                   | 0                 | 0                  |
| 1433Z_HUMAN  | YWHAZ     | 14-3-3 protein zeta/delta                                                         | 0                   | 0                 | 0                  |
| 2AAA_HUMAN   | PPP2R1A   | Serine/threonine-protein phosphatase 2A 65 kDa regulatory subunit A alpha isoform | 0                   | 0                 | 0                  |
| 4F2_HUMAN    | SLC3A2    | 4F2 cell-surface antigen heavy chain                                              | 0                   | 0                 | 0                  |
| 5NTD_HUMAN   | NTSE      | 5'-nucleotidase                                                                   | 0                   | 0                 | 0                  |
| ACLY_HUMAN   | ACLY      | ATP-citrate synthase                                                              | 0                   | 0                 | 0                  |
| ACSL4_HUMAN  | ACSL4     | Long-chain-fatty-acid--CoA ligase 4                                               | 0                   | 0                 | 0                  |
| ACTB_HUMAN   | ACTB      | Actin, cytoplasmic 1                                                              | 0                   | 0                 | 0                  |
| AHNK_HUMAN   | AHNK      | Neuroblast differentiation-associated protein AHNK                                | 0                   | 0                 | 0                  |
| ALDOA_HUMAN  | ALDOA     | Fructose-bisphosphate aldolase A                                                  | 0                   | 0                 | 0                  |
| ALDR_HUMAN   | AKR1B1    | Aldose reductase                                                                  | 0                   | 0                 | 0                  |
| AMPN_HUMAN   | ANPEP     | Aminopeptidase N                                                                  | 0                   | 0                 | 0                  |
| ANX11_HUMAN  | ANXA11    | Annexin A11                                                                       | 0                   | 0                 | 0                  |
| ANXA1_HUMAN  | ANXA1     | Annexin A1                                                                        | 0                   | 0                 | 0                  |
| ANXA2_HUMAN  | ANXA2     | Annexin A2                                                                        | 0                   | 0                 | 0                  |
| ANXA3_HUMAN  | ANXA3     | Annexin A3                                                                        | 0                   | 0                 | 0                  |
| ANXA4_HUMAN  | ANXA4     | Annexin A4                                                                        | 0                   | 0                 | 0                  |
| ANXA5_HUMAN  | ANXA5     | Annexin A5                                                                        | 0                   | 0                 | 0                  |
| ANXA6_HUMAN  | ANXA6     | Annexin A6                                                                        | 0                   | 0                 | 0                  |
| ANXA7_HUMAN  | ANXA7     | Annexin A7                                                                        | 0                   | 0                 | 0                  |
| ARPC4_HUMAN  | ARPC4     | Actin-related protein 2/3 complex subunit 4                                       | 0                   | 0                 | 0                  |
| AT1A1_HUMAN  | ATP1A1    | Sodium/potassium-transporting ATPase subunit alpha-1                              | 0                   | 0                 | 0                  |
| B2MG_HUMAN   | B2M       | Beta-2-microglobulin                                                              | 0                   | 0                 | 0                  |
| BACH_HUMAN   | ACOT7     | Cytosolic acyl coenzyme A thioester hydrolase                                     | 0                   | 0                 | 0                  |
| BASI_HUMAN   | BSG       | Basigin                                                                           | 0                   | 0                 | 0                  |
| BASP1_HUMAN  | BASP1     | Brain acid soluble protein 1                                                      | 0                   | 0                 | 0                  |
| BST2_HUMAN   | BST2      | Bone marrow stromal antigen 2                                                     | 0                   | 0                 | 0                  |
| C1TC_HUMAN   | MTHFD1    | C-1-tetrahydrofolate synthase, cytoplasmic                                        | 0                   | 0                 | 0                  |
| CAN2_HUMAN   | CAPN2     | Calpain-2 catalytic subunit                                                       | 0                   | 0                 | 0                  |
| CAP1_HUMAN   | CAP1      | Adenylyl cyclase-associated protein 1                                             | 0                   | 0                 | 0                  |
| CD166_HUMAN  | ALCAM     | CD166 antigen                                                                     | 0                   | 0                 | 0                  |
| CD44_HUMAN   | CD44      | CD44 antigen                                                                      | 0                   | 0                 | 0                  |
| CD59_HUMAN   | CD59      | CD59 glycoprotein                                                                 | 0                   | 0                 | 0                  |
| CDC42_HUMAN  | CDC42     | Cell division control protein 42 homolog                                          | 0                   | 0                 | 0                  |
| CHM4B_HUMAN  | CHMP4B    | Charged multivesicular body protein 4b                                            | 0                   | 0                 | 0                  |
| CLCA_HUMAN   | CLTA      | Clathrin light chain A                                                            | 0                   | 0                 | 0                  |
| CLH1_HUMAN   | CLTC      | Clathrin heavy chain 1                                                            | 0                   | 0                 | 0                  |
| CN37_HUMAN   | CNP       | 2',3'-cyclic-nucleotide 3'-phosphodiesterase                                      | 0                   | 0                 | 0                  |
| COF1_HUMAN   | CFL1      | Cofilin-1                                                                         | 0                   | 0                 | 0                  |
| COF2_HUMAN   | CFL2      | Cofilin-2                                                                         | 0                   | 0                 | 0                  |
| COPA_HUMAN   | COPA      | Coatomer subunit alpha                                                            | 0                   | 0                 | 0                  |
| COR1C_HUMAN  | CORO1C    | Coronin-1C                                                                        | 0                   | 0                 | 0                  |
| CPNE3_HUMAN  | CPNE3     | Copine-3                                                                          | 0                   | 0                 | 0                  |
| CSRP1_HUMAN  | CSRP1     | Cysteine and glycine-rich protein 1                                               | 0                   | 0                 | 0                  |
| CTNA1_HUMAN  | CTNNA1    | Catenin alpha-1                                                                   | 0                   | 0                 | 0                  |
| CTNB1_HUMAN  | CTNNA1    | Catenin beta-1                                                                    | 0                   | 0                 | 0                  |
| CTND1_HUMAN  | CTNND1    | Catenin delta-1                                                                   | 0                   | 0                 | 0                  |
| CYFP1_HUMAN  | CYFP1     | Cytoplasmic FMR1-interacting protein 1                                            | 0                   | 0                 | 0                  |
| DDX17_HUMAN  | DDX17     | Probable ATP-dependent RNA helicase DDX17                                         | 0                   | 0                 | 0                  |
| DDX21_HUMAN  | DDX21     | Nucleolar RNA helicase 2                                                          | 0                   | 0                 | 0                  |
| DHX9_HUMAN   | DHX9      | ATP-dependent RNA helicase A                                                      | 0                   | 0                 | 0                  |
| DNIA1_HUMAN  | DNIA1     | Dnal homolog subfamily A member 1                                                 | 0                   | 0                 | 0                  |
| DPYL2_HUMAN  | DPYSL2    | Dihydropyrimidinase-related protein 2                                             | 0                   | 0                 | 0                  |
| DYH9_HUMAN   | DNAH9     | Dynein heavy chain 9, axonemal                                                    | 0                   | 0                 | 0                  |
| DYHC1_HUMAN  | DYNCH1    | Cytoplasmic dynein 1 heavy chain 1                                                | 0                   | 0                 | 0                  |
| E41L2_HUMAN  | EPB41L2   | Band 4.1-like protein 2                                                           | 0                   | 0                 | 0                  |
| E41L3_HUMAN  | EPB41L3   | Band 4.1-like protein 3                                                           | 0                   | 0                 | 0                  |
| EDC4_HUMAN   | EDC4      | Enhancer of mRNA-decapping protein 4                                              | 0                   | 0                 | 0                  |
| EDIL3_HUMAN  | EDIL3     | EGF-like repeat and discoidin I-like domain-containing protein 3                  | 0                   | 0                 | 0                  |
| EEF1A1_HUMAN | EEF1A1    | Elongation factor 1-alpha 1                                                       | 0                   | 0                 | 0                  |
| EEF1D_HUMAN  | EEF1D     | Elongation factor 1-delta                                                         | 0                   | 0                 | 0                  |
| EEF1G_HUMAN  | EEF1G     | Elongation factor 1-gamma                                                         | 0                   | 0                 | 0                  |
| EEF2_HUMAN   | EEF2      | Elongation factor 2                                                               | 0                   | 0                 | 0                  |
| EGLN_HUMAN   | ENG       | Endoglin                                                                          | 0                   | 0                 | 0                  |
| EHD1_HUMAN   | EHD1      | EH domain-containing protein 1                                                    | 0                   | 0                 | 0                  |
| EIF3A_HUMAN  | EIF3A     | Eukaryotic translation initiation factor 3 subunit A                              | 0                   | 0                 | 0                  |
| EIF3B_HUMAN  | EIF3B     | Eukaryotic translation initiation factor 3 subunit B                              | 0                   | 0                 | 0                  |
| EIF3C_HUMAN  | EIF3C     | Eukaryotic translation initiation factor 3 subunit C                              | 0                   | 0                 | 0                  |
| EIF3D_HUMAN  | EIF3D     | Eukaryotic translation initiation factor 3 subunit D                              | 0                   | 0                 | 0                  |
| EIF3I_HUMAN  | EIF3I     | Eukaryotic translation initiation factor 3 subunit I                              | 0                   | 0                 | 0                  |
| ENOA_HUMAN   | ENO1      | Alpha-enolase                                                                     | 0                   | 0                 | 0                  |
| ENPL_HUMAN   | HSP90B1   | Endoplasmic                                                                       | 0                   | 0                 | 0                  |
| EPHA2_HUMAN  | EPHA2     | Ephrin type-A receptor 2                                                          | 0                   | 0                 | 0                  |
| EZR_HUMAN    | EZR       | Ezrin                                                                             | 0                   | 0                 | 0                  |
| FAS_HUMAN    | FASN      | Fatty acid synthase                                                               | 0                   | 0                 | 0                  |
| FBLN3_HUMAN  | EFEMP1    | EGF-containing fibulin-like extracellular matrix protein 1                        | 0                   | 0                 | 0                  |
| FERM2_HUMAN  | FERMT2    | Fermitin family homolog 2                                                         | 0                   | 0                 | 0                  |
| FINC_HUMAN   | FN1       | Fibronectin                                                                       | 0                   | 0                 | 0                  |
| FLNA_HUMAN   | FLNA      | Filamin-A                                                                         | 0                   | 0                 | 0                  |
| FLNB_HUMAN   | FLNB      | Filamin-B                                                                         | 0                   | 0                 | 0                  |
| FLNC_HUMAN   | FLNC      | Filamin-C                                                                         | 0                   | 0                 | 0                  |
| FLOT1_HUMAN  | FLOT1     | Flotillin-1                                                                       | 0                   | 0                 | 0                  |
| FLOT2_HUMAN  | FLOT2     | Flotillin-2                                                                       | 0                   | 0                 | 0                  |
| G3BP1_HUMAN  | G3BP1     | Ras GTPase-activating protein-binding protein 1                                   | 0                   | 0                 | 0                  |
| G3P_HUMAN    | GAPDH     | Glyceraldehyde-3-phosphate dehydrogenase                                          | 0                   | 0                 | 0                  |
| G6PD_HUMAN   | G6PD      | Glucose-6-phosphate 1-dehydrogenase                                               | 0                   | 0                 | 0                  |
| GANAB_HUMAN  | GANAB     | Neutral alpha-glucosidase AB                                                      | 0                   | 0                 | 0                  |
| GBB1_HUMAN   | GNB1      | Guanine nucleotide-binding protein G(I)/G(S)/G(T) subunit beta-1                  | 0                   | 0                 | 0                  |
| GBB2_HUMAN   | GNB2      | Guanine nucleotide-binding protein G(I)/G(S)/G(T) subunit beta-2                  | 0                   | 0                 | 0                  |
| GDI2_HUMAN   | GDI2      | Rab GDP dissociation inhibitor beta                                               | 0                   | 0                 | 0                  |

|              |          |                                                               |   |   |   |
|--------------|----------|---------------------------------------------------------------|---|---|---|
| GDIR1_HUMAN  | ARHGDI2  | Rho GDP-dissociation inhibitor 1                              | 0 | 0 | 0 |
| GELS_HUMAN   | GSN      | Gelsolin                                                      | 0 | 0 | 0 |
| GNAI2_HUMAN  | GNAI2    | Guanine nucleotide-binding protein G(i) subunit alpha-2       | 0 | 0 | 0 |
| GNAI3_HUMAN  | GNAI3    | Guanine nucleotide-binding protein G(k) subunit alpha         | 0 | 0 | 0 |
| GNAQ_HUMAN   | GNAQ     | Guanine nucleotide-binding protein G(q) subunit alpha         | 0 | 0 | 0 |
| GRP78_HUMAN  | HSPA5    | 78 kDa glucose-regulated protein                              | 0 | 0 | 0 |
| H4_HUMAN     | HIST1H4A | Histone H4                                                    | 0 | 0 | 0 |
| HMGAI1_HUMAN | HMGAI1   | High mobility group protein HMGI-1/HMGI-2                     | 0 | 0 | 0 |
| HN1_HUMAN    | HN1      | Hematological and neurological expressed 1 protein            | 0 | 0 | 0 |
| HNRH1_HUMAN  | HNRNP1   | Heterogeneous nuclear ribonucleoprotein H                     | 0 | 0 | 0 |
| HNRPC_HUMAN  | HNRNPC   | Heterogeneous nuclear ribonucleoproteins C1/C2                | 0 | 0 | 0 |
| HNRPK_HUMAN  | HNRPK    | Heterogeneous nuclear ribonucleoprotein K                     | 0 | 0 | 0 |
| HNRPM_HUMAN  | HNRNPM   | Heterogeneous nuclear ribonucleoprotein M                     | 0 | 0 | 0 |
| HNRPR_HUMAN  | HNRNPR   | Heterogeneous nuclear ribonucleoprotein R                     | 0 | 0 | 0 |
| HNRPU_HUMAN  | HNRNPU   | Heterogeneous nuclear ribonucleoprotein U                     | 0 | 0 | 0 |
| HS105_HUMAN  | HSPH1    | Heat shock protein 105 kDa                                    | 0 | 0 | 0 |
| HS90A_HUMAN  | HSP90AA1 | Heat shock protein HSP 90-alpha                               | 0 | 0 | 0 |
| HS90B_HUMAN  | HSP90AB1 | Heat shock protein HSP 90-beta                                | 0 | 0 | 0 |
| HSP7C_HUMAN  | HSPA8    | Heat shock cognate 71 kDa protein                             | 0 | 0 | 0 |
| HSPB1_HUMAN  | HSPB1    | Heat shock protein beta-1                                     | 0 | 0 | 0 |
| ICAM1_HUMAN  | ICAM1    | Intercellular adhesion molecule 1                             | 0 | 0 | 0 |
| IF2P_HUMAN   | EIF5B    | Eukaryotic translation initiation factor 5B                   | 0 | 0 | 0 |
| IF6_HUMAN    | EIF6     | Eukaryotic translation initiation factor 6                    | 0 | 0 | 0 |
| ILK_HUMAN    | ILK      | Integrin-linked protein kinase                                | 0 | 0 | 0 |
| IMDH2_HUMAN  | IMPDH2   | Inosine-5'-monophosphate dehydrogenase 2                      | 0 | 0 | 0 |
| IQGA1_HUMAN  | IQGAP1   | Ras GTPase-activating-like protein IQGAP1                     | 0 | 0 | 0 |
| ITA2_HUMAN   | ITGA2    | Integrin alpha-2                                              | 0 | 0 | 0 |
| ITA3_HUMAN   | ITGA3    | Integrin alpha-3                                              | 0 | 0 | 0 |
| ITA5_HUMAN   | ITGA5    | Integrin alpha-5                                              | 0 | 0 | 0 |
| ITB1_HUMAN   | ITGB1    | Integrin beta-1                                               | 0 | 0 | 0 |
| K1C18_HUMAN  | KRT18    | Keratin, type I cytoskeletal 18                               | 0 | 0 | 0 |
| K2C1_HUMAN   | KRT1     | Keratin, type II cytoskeletal 1                               | 0 | 0 | 0 |
| K2C7_HUMAN   | KRT7     | Keratin, type II cytoskeletal 7                               | 0 | 0 | 0 |
| KAP0_HUMAN   | PRKAR1A  | cAMP-dependent protein kinase type I-alpha regulatory subunit | 0 | 0 | 0 |
| KPYM_HUMAN   | PKM      | Pyruvate kinase PKM                                           | 0 | 0 | 0 |
| LAMC1_HUMAN  | LAMC1    | Laminin subunit gamma-1                                       | 0 | 0 | 0 |
| LAMP1_HUMAN  | LAMP1    | Lysosome-associated membrane glycoprotein 1                   | 0 | 0 | 0 |
| LAT1_HUMAN   | SLC7A5   | Large neutral amino acids transporter small subunit 1         | 0 | 0 | 0 |
| LDHA_HUMAN   | LDHA     | L-lactate dehydrogenase A chain                               | 0 | 0 | 0 |
| LDHB_HUMAN   | LDHB     | L-lactate dehydrogenase B chain                               | 0 | 0 | 0 |
| LEG1_HUMAN   | LGALS1   | Galectin-1                                                    | 0 | 0 | 0 |
| LMNA_HUMAN   | LMNA     | Prelamin-A/C                                                  | 0 | 0 | 0 |
| MAP4_HUMAN   | MAP4     | Microtubule-associated protein 4                              | 0 | 0 | 0 |
| MATR3_HUMAN  | MATR3    | Matrin-3                                                      | 0 | 0 | 0 |
| MDHC_HUMAN   | MDH1     | Malate dehydrogenase, cytoplasmic                             | 0 | 0 | 0 |
| MOES_HUMAN   | MSN      | Moesin                                                        | 0 | 0 | 0 |
| MUC18_HUMAN  | MCAM     | Cell surface glycoprotein MUC18                               | 0 | 0 | 0 |
| MVP_HUMAN    | MVP      | Major vault protein                                           | 0 | 0 | 0 |
| MX1_HUMAN    | MX1      | Interferon-induced GTP-binding protein Mx1                    | 0 | 0 | 0 |
| MYH9_HUMAN   | MYH9     | Mysin-9                                                       | 0 | 0 | 0 |
| MYL6_HUMAN   | MYL6     | Mysin light polypeptide 6                                     | 0 | 0 | 0 |
| MYO1C_HUMAN  | MYO1C    | Unconventional myosin-Ic                                      | 0 | 0 | 0 |
| MYOF_HUMAN   | MYOF     | Myoferlin                                                     | 0 | 0 | 0 |
| MYPT1_HUMAN  | PPP1R12A | Protein phosphatase 1 regulatory subunit 12A                  | 0 | 0 | 0 |
| NIBL1_HUMAN  | FAM129B  | Niban-like protein 1                                          | 0 | 0 | 0 |
| NPM_HUMAN    | NPM1     | Nucleophosmin                                                 | 0 | 0 | 0 |
| NUCL_HUMAN   | NCL      | Nucleolin                                                     | 0 | 0 | 0 |
| PARP4_HUMAN  | PARP4    | Poly [ADP-ribose] polymerase 4                                | 0 | 0 | 0 |
| PCBP2_HUMAN  | PCBP2    | Poly(rC)-binding protein 2                                    | 0 | 0 | 0 |
| PDC61_HUMAN  | PDCD6IP  | Programmed cell death 6-interacting protein                   | 0 | 0 | 0 |
| PDIA3_HUMAN  | PDIA3    | Protein disulfide-isomerase A3                                | 0 | 0 | 0 |
| PDLI1_HUMAN  | PDIM1    | PDZ and LIM domain protein 1                                  | 0 | 0 | 0 |
| PFKAP_HUMAN  | PFKP     | ATP-dependent 6-phosphofructokinase, platelet type            | 0 | 0 | 0 |
| PGAM1_HUMAN  | PGAM1    | Phosphoglycerate mutase 1                                     | 0 | 0 | 0 |
| PGK1_HUMAN   | PGK1     | Phosphoglycerate kinase 1                                     | 0 | 0 | 0 |
| PLEC_HUMAN   | PLEC     | Plectin                                                       | 0 | 0 | 0 |
| PLOD2_HUMAN  | PLOD2    | Procollagen-lysine,2-oxoglutarate 5-dioxygenase 2             | 0 | 0 | 0 |
| PPIA_HUMAN   | PPIA     | Peptidyl-prolyl cis-trans isomerase A                         | 0 | 0 | 0 |
| PRDX1_HUMAN  | PRDX1    | Peroxiredoxin-1                                               | 0 | 0 | 0 |
| PRDX6_HUMAN  | PRDX6    | Peroxiredoxin-6                                               | 0 | 0 | 0 |
| PRKDC_HUMAN  | PRKDC    | DNA-dependent protein kinase catalytic subunit                | 0 | 0 | 0 |
| PROF1_HUMAN  | PFN1     | Profilin-1                                                    | 0 | 0 | 0 |
| PRP8_HUMAN   | PRPF8    | Pre-mRNA-processing-splicing factor 8                         | 0 | 0 | 0 |
| PR56A_HUMAN  | PSMC3    | 26S protease regulatory subunit 6A                            | 0 | 0 | 0 |
| PRS7_HUMAN   | PSMC2    | 26S protease regulatory subunit 7                             | 0 | 0 | 0 |
| PSA7_HUMAN   | PSMA7    | Proteasome subunit alpha type-7                               | 0 | 0 | 0 |
| PSMD3_HUMAN  | PSMD3    | 26S proteasome non-ATPase regulatory subunit 3                | 0 | 0 | 0 |
| PTRF_HUMAN   | PTRF     | Polymerase I and transcript release factor                    | 0 | 0 | 0 |
| PTX3_HUMAN   | PTX3     | Pentraxin-related protein PTX3                                | 0 | 0 | 0 |
| PUR4_HUMAN   | PFAS     | Phosphoribosylformylglycinamide synthase                      | 0 | 0 | 0 |
| PUR6_HUMAN   | PAICS    | Multifunctional protein ADE2                                  | 0 | 0 | 0 |
| PYR1_HUMAN   | CAD      | CAD protein                                                   | 0 | 0 | 0 |
| RAB14_HUMAN  | RAB14    | Ras-related protein Rab-14                                    | 0 | 0 | 0 |
| RAB1A_HUMAN  | RAB1A    | Ras-related protein Rab-1A                                    | 0 | 0 | 0 |
| RAB5C_HUMAN  | RAB5C    | Ras-related protein Rab-5C                                    | 0 | 0 | 0 |
| RAB7A_HUMAN  | RAB7A    | Ras-related protein Rab-7a                                    | 0 | 0 | 0 |
| RAB8A_HUMAN  | RAB8A    | Ras-related protein Rab-8A                                    | 0 | 0 | 0 |
| RAB8B_HUMAN  | RAB8B    | Ras-related protein Rab-8B                                    | 0 | 0 | 0 |
| RAC1_HUMAN   | RAC1     | Ras-related C3 botulinum toxin substrate 1                    | 0 | 0 | 0 |
| RALA_HUMAN   | RALA     | Ras-related protein Ral-A                                     | 0 | 0 | 0 |
| RAN_HUMAN    | RAN      | GTP-binding nuclear protein Ran                               | 0 | 0 | 0 |
| RBM39_HUMAN  | RBM39    | RNA-binding protein 39                                        | 0 | 0 | 0 |
| RFTN1_HUMAN  | RFTN1    | Raftlin                                                       | 0 | 0 | 0 |
| RHOG_HUMAN   | RHOG     | Rho-related GTP-binding protein RhoG                          | 0 | 0 | 0 |

|             |           |                                                    |   |   |   |
|-------------|-----------|----------------------------------------------------|---|---|---|
| RINI_HUMAN  | RNH1      | Ribonuclease inhibitor                             | 0 | 0 | 0 |
| RL10_HUMAN  | RPL10     | 60S ribosomal protein L10                          | 0 | 0 | 0 |
| RL10A_HUMAN | RPL10A    | 60S ribosomal protein L10a                         | 0 | 0 | 0 |
| RL11_HUMAN  | RPL11     | 60S ribosomal protein L11                          | 0 | 0 | 0 |
| RL12_HUMAN  | RPL12     | 60S ribosomal protein L12                          | 0 | 0 | 0 |
| RL13_HUMAN  | RPL13     | 60S ribosomal protein L13                          | 0 | 0 | 0 |
| RL13A_HUMAN | RPL13A    | 60S ribosomal protein L13a                         | 0 | 0 | 0 |
| RL14_HUMAN  | RPL14     | 60S ribosomal protein L14                          | 0 | 0 | 0 |
| RL15_HUMAN  | RPL15     | 60S ribosomal protein L15                          | 0 | 0 | 0 |
| RL17_HUMAN  | RPL17     | 60S ribosomal protein L17                          | 0 | 0 | 0 |
| RL18_HUMAN  | RPL18     | 60S ribosomal protein L18                          | 0 | 0 | 0 |
| RL18A_HUMAN | RPL18A    | 60S ribosomal protein L18a                         | 0 | 0 | 0 |
| RL19_HUMAN  | RPL19     | 60S ribosomal protein L19                          | 0 | 0 | 0 |
| RL21_HUMAN  | RPL21     | 60S ribosomal protein L21                          | 0 | 0 | 0 |
| RL23_HUMAN  | RPL23     | 60S ribosomal protein L23                          | 0 | 0 | 0 |
| RL23A_HUMAN | RPL23A    | 60S ribosomal protein L23a                         | 0 | 0 | 0 |
| RL24_HUMAN  | RPL24     | 60S ribosomal protein L24                          | 0 | 0 | 0 |
| RL27_HUMAN  | RPL27     | 60S ribosomal protein L27                          | 0 | 0 | 0 |
| RL27A_HUMAN | RPL27A    | 60S ribosomal protein L27a                         | 0 | 0 | 0 |
| RL28_HUMAN  | RPL28     | 60S ribosomal protein L28                          | 0 | 0 | 0 |
| RL29_HUMAN  | RPL29     | 60S ribosomal protein L29                          | 0 | 0 | 0 |
| RL3_HUMAN   | RPL3      | 60S ribosomal protein L3                           | 0 | 0 | 0 |
| RL30_HUMAN  | RPL30     | 60S ribosomal protein L30                          | 0 | 0 | 0 |
| RL31_HUMAN  | RPL31     | 60S ribosomal protein L31                          | 0 | 0 | 0 |
| RL35A_HUMAN | RPL35A    | 60S ribosomal protein L35a                         | 0 | 0 | 0 |
| RL36_HUMAN  | RPL36     | 60S ribosomal protein L36                          | 0 | 0 | 0 |
| RL36A_HUMAN | RPL36A    | 60S ribosomal protein L36a                         | 0 | 0 | 0 |
| RL37A_HUMAN | RPL37A    | 60S ribosomal protein L37a                         | 0 | 0 | 0 |
| RL38_HUMAN  | RPL38     | 60S ribosomal protein L38                          | 0 | 0 | 0 |
| RL4_HUMAN   | RPL4      | 60S ribosomal protein L4                           | 0 | 0 | 0 |
| RL5_HUMAN   | RPL5      | 60S ribosomal protein L5                           | 0 | 0 | 0 |
| RL6_HUMAN   | RPL6      | 60S ribosomal protein L6                           | 0 | 0 | 0 |
| RL7_HUMAN   | RPL7      | 60S ribosomal protein L7                           | 0 | 0 | 0 |
| RL7A_HUMAN  | RPL7A     | 60S ribosomal protein L7a                          | 0 | 0 | 0 |
| RL8_HUMAN   | RPL8      | 60S ribosomal protein L8                           | 0 | 0 | 0 |
| RL9_HUMAN   | RPL9      | 60S ribosomal protein L9                           | 0 | 0 | 0 |
| RLA1_HUMAN  | RPLP1     | 60S acidic ribosomal protein P1                    | 0 | 0 | 0 |
| RLA2_HUMAN  | RPLP2     | 60S acidic ribosomal protein P2                    | 0 | 0 | 0 |
| ROA2_HUMAN  | HNRNPA2B1 | Heterogeneous nuclear ribonucleoproteins A2/B1     | 0 | 0 | 0 |
| RS11_HUMAN  | RPS11     | 40S ribosomal protein S11                          | 0 | 0 | 0 |
| RS12_HUMAN  | RPS12     | 40S ribosomal protein S12                          | 0 | 0 | 0 |
| RS13_HUMAN  | RPS13     | 40S ribosomal protein S13                          | 0 | 0 | 0 |
| RS14_HUMAN  | RPS14     | 40S ribosomal protein S14                          | 0 | 0 | 0 |
| RS15A_HUMAN | RPS15A    | 40S ribosomal protein S15a                         | 0 | 0 | 0 |
| RS16_HUMAN  | RPS16     | 40S ribosomal protein S16                          | 0 | 0 | 0 |
| RS18_HUMAN  | RPS18     | 40S ribosomal protein S18                          | 0 | 0 | 0 |
| RS19_HUMAN  | RPS19     | 40S ribosomal protein S19                          | 0 | 0 | 0 |
| RS2_HUMAN   | RPS2      | 40S ribosomal protein S2                           | 0 | 0 | 0 |
| RS20_HUMAN  | RPS20     | 40S ribosomal protein S20                          | 0 | 0 | 0 |
| RS21_HUMAN  | RPS21     | 40S ribosomal protein S21                          | 0 | 0 | 0 |
| RS23_HUMAN  | RPS23     | 40S ribosomal protein S23                          | 0 | 0 | 0 |
| RS26_HUMAN  | RPS26     | 40S ribosomal protein S26                          | 0 | 0 | 0 |
| RS27A_HUMAN | RPS27A    | Ubiquitin-40S ribosomal protein S27a               | 0 | 0 | 0 |
| RS28_HUMAN  | RPS28     | 40S ribosomal protein S28                          | 0 | 0 | 0 |
| RS3_HUMAN   | RPS3      | 40S ribosomal protein S3                           | 0 | 0 | 0 |
| RS3A_HUMAN  | RPS3A     | 40S ribosomal protein S3a                          | 0 | 0 | 0 |
| RS4X_HUMAN  | RPS4X     | 40S ribosomal protein S4, X isoform                | 0 | 0 | 0 |
| RS5_HUMAN   | RPS5      | 40S ribosomal protein S5                           | 0 | 0 | 0 |
| RS6_HUMAN   | RPS6      | 40S ribosomal protein S6                           | 0 | 0 | 0 |
| RS7_HUMAN   | RPS7      | 40S ribosomal protein S7                           | 0 | 0 | 0 |
| RS8_HUMAN   | RPS8      | 40S ribosomal protein S8                           | 0 | 0 | 0 |
| RS9_HUMAN   | RPS9      | 40S ribosomal protein S9                           | 0 | 0 | 0 |
| RSSA_HUMAN  | RPSA      | 40S ribosomal protein SA                           | 0 | 0 | 0 |
| RTN4_HUMAN  | RTN4      | Reticulon-4                                        | 0 | 0 | 0 |
| RUVB1_HUMAN | RUVBL1    | RuvB-like 1                                        | 0 | 0 | 0 |
| RUVB2_HUMAN | RUVBL2    | RuvB-like 2                                        | 0 | 0 | 0 |
| SCAM3_HUMAN | SCAMP3    | Secretory carrier-associated membrane protein 3    | 0 | 0 | 0 |
| SEPT9_HUMAN | 9-Sep     | Septin-9                                           | 0 | 0 | 0 |
| SMC2_HUMAN  | SMC2      | Structural maintenance of chromosomes protein 2    | 0 | 0 | 0 |
| SMD3_HUMAN  | SNRPD3    | Small nuclear ribonucleoprotein Sm D3              | 0 | 0 | 0 |
| SNP23_HUMAN | SNAP23    | Synaptosomal-associated protein 23                 | 0 | 0 | 0 |
| SPP2A_HUMAN | SPPL2A    | Signal peptide peptidase-like 2A                   | 0 | 0 | 0 |
| SQSTM_HUMAN | SQSTM1    | Sequestosome-1                                     | 0 | 0 | 0 |
| SRC8_HUMAN  | CTTN      | Src substrate cortactin                            | 0 | 0 | 0 |
| SRRM2_HUMAN | SRRM2     | Serine/arginine repetitive matrix protein 2        | 0 | 0 | 0 |
| SRSF3_HUMAN | SRSF3     | Serine/arginine-rich splicing factor 3             | 0 | 0 | 0 |
| SRSF6_HUMAN | SRSF6     | Serine/arginine-rich splicing factor 6             | 0 | 0 | 0 |
| SRSF7_HUMAN | SRSF7     | Serine/arginine-rich splicing factor 7             | 0 | 0 | 0 |
| SSBP_HUMAN  | SSBP1     | Single-stranded DNA-binding protein, mitochondrial | 0 | 0 | 0 |
| SSRP1_HUMAN | SSRP1     | FACT complex subunit SSRP1                         | 0 | 0 | 0 |
| STMN1_HUMAN | STMN1     | Stathmin                                           | 0 | 0 | 0 |
| STOM_HUMAN  | STOM      | Erythrocyte band 7 integral membrane protein       | 0 | 0 | 0 |
| STX7_HUMAN  | STX7      | Syntaxin-7                                         | 0 | 0 | 0 |
| STXB1_HUMAN | STXBP1    | Syntaxin-binding protein 1                         | 0 | 0 | 0 |
| SYEP_HUMAN  | EPRS      | Bifunctional glutamate/proline-tRNA ligase         | 0 | 0 | 0 |
| SYIC_HUMAN  | IARS      | Isoleucine-tRNA ligase, cytoplasmic                | 0 | 0 | 0 |
| SYMC_HUMAN  | MARS      | Methionine-tRNA ligase, cytoplasmic                | 0 | 0 | 0 |
| SYRC_HUMAN  | RARS      | Arginine-tRNA ligase, cytoplasmic                  | 0 | 0 | 0 |
| SYSC_HUMAN  | SARS      | Serine-tRNA ligase, cytoplasmic                    | 0 | 0 | 0 |
| TAGL2_HUMAN | TAGLN2    | Transgelin-2                                       | 0 | 0 | 0 |
| TBB5_HUMAN  | TUBB      | Tubulin beta chain                                 | 0 | 0 | 0 |
| TBB6_HUMAN  | TUBB6     | Tubulin beta-6 chain                               | 0 | 0 | 0 |
| TCPA_HUMAN  | TCP1      | T-complex protein 1 subunit alpha                  | 0 | 0 | 0 |
| TCPB_HUMAN  | CCT2      | T-complex protein 1 subunit beta                   | 0 | 0 | 0 |

|             |          |                                                          |   |   |   |
|-------------|----------|----------------------------------------------------------|---|---|---|
| TCPD_HUMAN  | CCT4     | T-complex protein 1 subunit delta                        | 0 | 0 | 0 |
| TCPE_HUMAN  | CCT5     | T-complex protein 1 subunit epsilon                      | 0 | 0 | 0 |
| TCPG_HUMAN  | CCT3     | T-complex protein 1 subunit gamma                        | 0 | 0 | 0 |
| TCPH_HUMAN  | CCT7     | T-complex protein 1 subunit eta                          | 0 | 0 | 0 |
| TCPO_HUMAN  | CCT8     | T-complex protein 1 subunit theta                        | 0 | 0 | 0 |
| TCPZ_HUMAN  | CCT6A    | T-complex protein 1 subunit zeta                         | 0 | 0 | 0 |
| TEBP_HUMAN  | PTGES3   | Prostaglandin E synthase 3                               | 0 | 0 | 0 |
| TERA_HUMAN  | VCP      | Transitional endoplasmic reticulum ATPase                | 0 | 0 | 0 |
| TFR1_HUMAN  | TFRC     | Transferrin receptor protein 1                           | 0 | 0 | 0 |
| TGM2_HUMAN  | TGM2     | Protein-glutamine gamma-glutamyltransferase 2            | 0 | 0 | 0 |
| TLDC1_HUMAN | TLDC1    | TLD domain-containing protein 1                          | 0 | 0 | 0 |
| TLN1_HUMAN  | TLN1     | Talin-1                                                  | 0 | 0 | 0 |
| TPIS_HUMAN  | TP11     | Triosephosphate isomerase                                | 0 | 0 | 0 |
| TPM3_HUMAN  | TPM3     | Tropomyosin alpha-3 chain                                | 0 | 0 | 0 |
| TRA2B_HUMAN | TRA2B    | Transformer-2 protein homolog beta                       | 0 | 0 | 0 |
| U520_HUMAN  | SNRNP200 | U5 small nuclear ribonucleoprotein 200 kDa helicase      | 0 | 0 | 0 |
| U551_HUMAN  | EFTUD2   | 116 kDa U5 small nuclear ribonucleoprotein component     | 0 | 0 | 0 |
| UAP1_HUMAN  | UAP1     | UDP-N-acetylhexosamine pyrophosphorylase                 | 0 | 0 | 0 |
| UBA1_HUMAN  | UBA1     | Ubiquitin-like modifier-activating enzyme 1              | 0 | 0 | 0 |
| UGDH_HUMAN  | UGDH     | UDP-glucose 6-dehydrogenase                              | 0 | 0 | 0 |
| VA0D1_HUMAN | ATP6VOD1 | V-type proton ATPase subunit d 1                         | 0 | 0 | 0 |
| VASP_HUMAN  | VASP     | Vasodilator-stimulated phosphoprotein                    | 0 | 0 | 0 |
| VAT1_HUMAN  | VAT1     | Synaptic vesicle membrane protein VAT-1 homolog          | 0 | 0 | 0 |
| VIME_HUMAN  | VIM      | Vimentin                                                 | 0 | 0 | 0 |
| VINC_HUMAN  | VCL      | Vinculin                                                 | 0 | 0 | 0 |
| WDR1_HUMAN  | WDR1     | WD repeat-containing protein 1                           | 0 | 0 | 0 |
| ZCHV_HUMAN  | ZC3HAV1  | Zinc finger CCCH-type antiviral protein 1                | 0 | 0 | 0 |
| ZO1_HUMAN   | TJP1     | Tight junction protein ZO-1                              | 0 | 0 | 0 |
| ZO2_HUMAN   | TJP2     | Tight junction protein ZO-2                              | 0 | 0 | 0 |
| ZYX_HUMAN   | ZYX      | Zyxin                                                    | 0 | 0 | 0 |
| GBLP_HUMAN  | RACK1    | Guanine nucleotide-binding protein subunit beta-2-like 1 | 0 | 0 | 0 |
| HSP71_HUMAN | HSPA1A/B | Heat shock 70 kDa protein 1A/1B                          | 0 | 0 | 0 |
| RS17L_HUMAN | RPS17    | 40S ribosomal protein S17-like                           | 0 | 0 | 0 |
| 1433F_HUMAN | YWHAH    | 14-3-3 protein eta                                       | 0 | 0 | 0 |
| 1433T_HUMAN | YWHAQ    | 14-3-3 protein theta                                     | 0 | 0 | 0 |
| AATM_HUMAN  | GOT2     | Aspartate aminotransferase, mitochondrial                | 0 | 0 | 0 |
| ABCE1_HUMAN | ABCE1    | ATP-binding cassette sub-family E member 1               | 0 | 0 | 0 |
| ACACA_HUMAN | ACACA    | Acetyl-CoA carboxylase 1                                 | 0 | 0 | 0 |
| ACAD9_HUMAN | ACAD9    | Acyl-CoA dehydrogenase family member 9, mitochondrial    | 0 | 0 | 0 |
| ACON_HUMAN  | ACO2     | Aconitate hydratase, mitochondrial                       | 0 | 0 | 0 |
| ACSL3_HUMAN | ACSL3    | Long-chain-fatty-acid-CoA ligase 3                       | 0 | 0 | 0 |
| ACTC_HUMAN  | ACTC1    | Actin, alpha cardiac muscle 1                            | 0 | 0 | 0 |
| ACTN1_HUMAN | ACTN1    | Alpha-actinin-1                                          | 0 | 0 | 0 |
| ACTN4_HUMAN | ACTN4    | Alpha-actinin-4                                          | 0 | 0 | 0 |
| ACTZ_HUMAN  | ACTR1A   | Alpha-centractin                                         | 0 | 0 | 0 |
| ADAS_HUMAN  | AGPS     | Alkyldihydroxyacetonephosphate synthase, peroxisomal     | 0 | 0 | 0 |
| ADRM1_HUMAN | ADRM1    | Proteasomal ubiquitin receptor ADRM1                     | 0 | 0 | 0 |
| ADT2_HUMAN  | SLC25A5  | ADP/ATP translocase 2                                    | 0 | 0 | 0 |
| ADT3_HUMAN  | SLC25A6  | ADP/ATP translocase 3                                    | 0 | 0 | 0 |
| AHSA1_HUMAN | AHSA1    | Activator of 90 kDa heat shock protein ATPase homolog 1  | 0 | 0 | 0 |
| AIFM1_HUMAN | AIFM1    | Apoptosis-inducing factor 1, mitochondrial               | 0 | 0 | 0 |
| AKA12_HUMAN | AKAP12   | A-kinase anchor protein 12                               | 0 | 0 | 0 |
| AL9A1_HUMAN | ALDH9A1  | 4-trimethylaminobutylaldehyde dehydrogenase              | 0 | 0 | 0 |
| ALDH2_HUMAN | ALDH2    | Aldehyde dehydrogenase, mitochondrial                    | 0 | 0 | 0 |
| AMPL_HUMAN  | LAP3     | Cytosol aminopeptidase                                   | 0 | 0 | 0 |
| ANLN_HUMAN  | ANLN     | Actin-binding protein anillin                            | 0 | 0 | 0 |
| AOFA_HUMAN  | MAOA     | Amine oxidase [flavin-containing] A                      | 0 | 0 | 0 |
| AP2B1_HUMAN | AP2B1    | AP-2 complex subunit beta                                | 0 | 0 | 0 |
| APMAP_HUMAN | APMAP    | Adipocyte plasma membrane-associated protein             | 0 | 0 | 0 |
| ARC1B_HUMAN | ARPC1B   | Actin-related protein 2/3 complex subunit 1B             | 0 | 0 | 0 |
| ARL2_HUMAN  | ARL2     | ADP-ribosylation factor-like protein 2                   | 0 | 0 | 0 |
| ARP2_HUMAN  | ACTR2    | Actin-related protein 2                                  | 0 | 0 | 0 |
| ARP3_HUMAN  | ACTR3    | Actin-related protein 3                                  | 0 | 0 | 0 |
| ARPC2_HUMAN | ARPC2    | Actin-related protein 2/3 complex subunit 2              | 0 | 0 | 0 |
| ARPC3_HUMAN | ARPC3    | Actin-related protein 2/3 complex subunit 3              | 0 | 0 | 0 |
| AT2A2_HUMAN | ATP2A2   | Sarcoplasmic/endoplasmic reticulum calcium ATPase 2      | 0 | 0 | 0 |
| ATP5H_HUMAN | ATP5H    | ATP synthase subunit d, mitochondrial                    | 0 | 0 | 0 |
| ATP5J_HUMAN | ATP5J    | ATP synthase-coupling factor 6, mitochondrial            | 0 | 0 | 0 |
| ATPA_HUMAN  | ATP5A1   | ATP synthase subunit alpha, mitochondrial                | 0 | 0 | 0 |
| ATPB_HUMAN  | ATP5B    | ATP synthase subunit beta, mitochondrial                 | 0 | 0 | 0 |
| ATPG_HUMAN  | ATP5C1   | ATP synthase subunit gamma, mitochondrial                | 0 | 0 | 0 |
| ATPO_HUMAN  | ATP5O    | ATP synthase subunit O, mitochondrial                    | 0 | 0 | 0 |
| BAG3_HUMAN  | BAG3     | BAG family molecular chaperone regulator 3               | 0 | 0 | 0 |
| BTF3_HUMAN  | BTF3     | Transcription factor BTF3                                | 0 | 0 | 0 |
| CALD1_HUMAN | CALD1    | Caldesmon                                                | 0 | 0 | 0 |
| CALR_HUMAN  | CALR     | Calreticulin                                             | 0 | 0 | 0 |
| CALU_HUMAN  | CALU     | Calumenin                                                | 0 | 0 | 0 |
| CALX_HUMAN  | CANX     | Calnexin                                                 | 0 | 0 | 0 |
| CAPR1_HUMAN | CAPRIN1  | Caprin-1                                                 | 0 | 0 | 0 |
| CATA_HUMAN  | CAT      | Catalase                                                 | 0 | 0 | 0 |
| CAZA1_HUMAN | CAPZA1   | F-actin-capping protein subunit alpha-1                  | 0 | 0 | 0 |
| CBX3_HUMAN  | CBX3     | Chromobox protein homolog 3                              | 0 | 0 | 0 |
| CH10_HUMAN  | HSP61    | 10 kDa heat shock protein, mitochondrial                 | 0 | 0 | 0 |
| CH60_HUMAN  | HSPD1    | 60 kDa heat shock protein, mitochondrial                 | 0 | 0 | 0 |
| CHD9_HUMAN  | CHD9     | Chromodomain-helicase-DNA-binding protein 9              | 0 | 0 | 0 |
| CHIP_HUMAN  | STUB1    | E3 ubiquitin-protein ligase CHIP                         | 0 | 0 | 0 |
| CHSP1_HUMAN | CARHSP1  | Calcium-regulated heat stable protein 1                  | 0 | 0 | 0 |
| CISY_HUMAN  | CS       | Citrate synthase, mitochondrial                          | 0 | 0 | 0 |
| CKAP4_HUMAN | CKAP4    | Cytoskeleton-associated protein 4                        | 0 | 0 | 0 |
| CLCB_HUMAN  | CLTB     | Clathrin light chain B                                   | 0 | 0 | 0 |
| CLIC1_HUMAN | CLIC1    | Chloride intracellular channel protein 1                 | 0 | 0 | 0 |
| CNPY2_HUMAN | CNPY2    | Protein canopy homolog 2                                 | 0 | 0 | 0 |
| COMT_HUMAN  | COMT     | Catechol O-methyltransferase                             | 0 | 0 | 0 |
| COPB2_HUMAN | COPB2    | Coatomer subunit beta'                                   | 0 | 0 | 0 |



|             |          |                                                                   |   |   |
|-------------|----------|-------------------------------------------------------------------|---|---|
| COPG1_HUMAN | COPG1    | Coatamer subunit gamma-1                                          | 0 | 0 |
| COR1B_HUMAN | CORO1B   | Coronin-1B                                                        | 0 | 0 |
| COX2_HUMAN  | MT-CO2   | Cytochrome c oxidase subunit 2                                    | 0 | 0 |
| COX41_HUMAN | COX41    | Cytochrome c oxidase subunit 4 isoform 1, mitochondrial           | 0 | 0 |
| COX5A_HUMAN | COX5A    | Cytochrome c oxidase subunit 5A, mitochondrial                    | 0 | 0 |
| COX5B_HUMAN | COX5B    | Cytochrome c oxidase subunit 5B, mitochondrial                    | 0 | 0 |
| CPT1A_HUMAN | CPT1A    | Carnitine O-palmitoyltransferase 1, liver isoform                 | 0 | 0 |
| CSDE1_HUMAN | CSDE1    | Cold shock domain-containing protein E1                           | 0 | 0 |
| CSK_HUMAN   | CSK      | Tyrosine-protein kinase CSK                                       | 0 | 0 |
| CSK21_HUMAN | CSNK2A1  | Casein kinase II subunit alpha                                    | 0 | 0 |
| CSK2B_HUMAN | CSNK2B   | Casein kinase II subunit beta                                     | 0 | 0 |
| CX6B1_HUMAN | COX6B1   | Cytochrome c oxidase subunit 6B1                                  | 0 | 0 |
| CY1_HUMAN   | CYC1     | Cytochrome c1, heme protein, mitochondrial                        | 0 | 0 |
| DC1L1_HUMAN | DYNC1L1  | Cytoplasmic dynein 1 light intermediate chain 1                   | 0 | 0 |
| DCTN1_HUMAN | DCTN1    | Dynactin subunit 1                                                | 0 | 0 |
| DD19B_HUMAN | DDX19B   | ATP-dependent RNA helicase DDX19B                                 | 0 | 0 |
| DDX3X_HUMAN | DDX3X    | ATP-dependent RNA helicase DDX3X                                  | 0 | 0 |
| DDX5_HUMAN  | DDX5     | Probable ATP-dependent RNA helicase DDX5                          | 0 | 0 |
| DEST_HUMAN  | DSTN     | Dextrin                                                           | 0 | 0 |
| DHB4_HUMAN  | HSD17B4  | Peroxisomal multifunctional enzyme type 2                         | 0 | 0 |
| DHCR7_HUMAN | DHCR7    | 7-dehydrocholesterol reductase                                    | 0 | 0 |
| DHE3_HUMAN  | GLUD1    | Glutamate dehydrogenase 1, mitochondrial                          | 0 | 0 |
| DLDH_HUMAN  | DLG      | Dihydrolipoyl dehydrogenase, mitochondrial                        | 0 | 0 |
| DNJB1_HUMAN | DNJB1    | DnaJ homolog subfamily B member 1                                 | 0 | 0 |
| DNJB4_HUMAN | DNJB4    | DnaJ homolog subfamily B member 4                                 | 0 | 0 |
| DPYL3_HUMAN | DPYL3    | Dihydropyrimidinase-related protein 3                             | 0 | 0 |
| DREB_HUMAN  | DBN1     | Drebrin                                                           | 0 | 0 |
| DSRAD_HUMAN | ADAR     | Double-stranded RNA-specific adenosine deaminase                  | 0 | 0 |
| DUT_HUMAN   | DUT      | Deoxyuridine 5'-triphosphate nucleotidohydrolase, mitochondrial   | 0 | 0 |
| DYN2_HUMAN  | DNM2     | Dynamin-2                                                         | 0 | 0 |
| DYST_HUMAN  | DST      | Dystonin                                                          | 0 | 0 |
| ECHA_HUMAN  | HADHA    | Trifunctional enzyme subunit alpha, mitochondrial                 | 0 | 0 |
| ECHB_HUMAN  | HADHB    | Trifunctional enzyme subunit beta, mitochondrial                  | 0 | 0 |
| ECHM_HUMAN  | ECHS1    | Enoyl-CoA hydratase, mitochondrial                                | 0 | 0 |
| ECI2_HUMAN  | ECI2     | Enoyl-CoA delta isomerase 2, mitochondrial                        | 0 | 0 |
| EF1B_HUMAN  | EEF1B2   | Elongation factor 1-beta                                          | 0 | 0 |
| EFHD2_HUMAN | EFHD2    | EF-hand domain-containing protein D2                              | 0 | 0 |
| EFTU_HUMAN  | TUFM     | Elongation factor Tu, mitochondrial                               | 0 | 0 |
| EMC1_HUMAN  | EMC1     | ER membrane protein complex subunit 1                             | 0 | 0 |
| EMC7_HUMAN  | EMC7     | ER membrane protein complex subunit 7                             | 0 | 0 |
| EMD_HUMAN   | EMD      | Emerin                                                            | 0 | 0 |
| ENAH_HUMAN  | ENAH     | Protein enabled homolog                                           | 0 | 0 |
| ERAP1_HUMAN | ERAP1    | Endoplasmic reticulum aminopeptidase 1                            | 0 | 0 |
| ERF3A_HUMAN | GSPT1    | Eukaryotic peptide chain release factor GTP-binding subunit ERF3A | 0 | 0 |
| ERGI1_HUMAN | ERGI1    | Endoplasmic reticulum-Golgi intermediate compartment protein 1    | 0 | 0 |
| ERLN1_HUMAN | ERLN1    | Erlin-1                                                           | 0 | 0 |
| ERP29_HUMAN | ERP29    | Endoplasmic reticulum resident protein 29                         | 0 | 0 |
| ERP44_HUMAN | ERP44    | Endoplasmic reticulum resident protein 44                         | 0 | 0 |
| ESTD_HUMAN  | ESD      | S-formylglutathione hydrolase                                     | 0 | 0 |
| ESYT1_HUMAN | ESYT1    | Extended synaptotagmin-1                                          | 0 | 0 |
| ETFA_HUMAN  | ETFA     | Electron transfer flavoprotein subunit alpha, mitochondrial       | 0 | 0 |
| ETFB_HUMAN  | ETFB     | Electron transfer flavoprotein subunit beta                       | 0 | 0 |
| F120A_HUMAN | FAM120A  | Constitutive coactivator of PPAR-gamma-like protein 1             | 0 | 0 |
| FBLI1_HUMAN | FBLIM1   | Filamin-binding LIM protein 1                                     | 0 | 0 |
| FBRL_HUMAN  | FBL      | rRNA 2'-O-methyltransferase fibrillar                             | 0 | 0 |
| FHL2_HUMAN  | FHL2     | Four and a half LIM domains protein 2                             | 0 | 0 |
| FKB10_HUMAN | FKBP10   | Peptidyl-prolyl cis-trans isomerase FKBP10                        | 0 | 0 |
| FLI1_HUMAN  | FLI1     | Protein flightless-1 homolog                                      | 0 | 0 |
| FSCN1_HUMAN | FSCN1    | Fascin                                                            | 0 | 0 |
| FUBP1_HUMAN | FUBP1    | Far upstream element-binding protein 1                            | 0 | 0 |
| FUBP2_HUMAN | KHSRP    | Far upstream element-binding protein 2                            | 0 | 0 |
| FUBP3_HUMAN | FUBP3    | Far upstream element-binding protein 3                            | 0 | 0 |
| FXR1_HUMAN  | FXR1     | Fragile X mental retardation syndrome-related protein 1           | 0 | 0 |
| G3BP2_HUMAN | G3BP2    | Ras GTPase-activating protein-binding protein 2                   | 0 | 0 |
| GALT2_HUMAN | GALNT2   | Polypeptide N-acetylgalactosaminyltransferase 2                   | 0 | 0 |
| GDIR2_HUMAN | ARHGDI2  | Rho GDI-dissociation inhibitor 2                                  | 0 | 0 |
| GFPT1_HUMAN | GFPT1    | Glutamine--fructose-6-phosphate aminotransferase [isomerizing] 1  | 0 | 0 |
| GLU2B_HUMAN | PRKCSH   | Glucosidase 2 subunit beta                                        | 0 | 0 |
| GLYM_HUMAN  | SHMT2    | Serine hydroxymethyltransferase, mitochondrial                    | 0 | 0 |
| GPDM_HUMAN  | GP2D     | Glycerol-3-phosphate dehydrogenase, mitochondrial                 | 0 | 0 |
| GPX1_HUMAN  | GPX1     | Glutathione peroxidase 1                                          | 0 | 0 |
| GRN_HUMAN   | GRN      | Granulins                                                         | 0 | 0 |
| GRP75_HUMAN | HSPA9    | Stress-70 protein, mitochondrial                                  | 0 | 0 |
| GRSF1_HUMAN | GRSF1    | G-rich sequence factor 1                                          | 0 | 0 |
| GSH0_HUMAN  | GCLM     | Glutamate--cysteine ligase regulatory subunit                     | 0 | 0 |
| GSTP1_HUMAN | GSTP1    | Glutathione S-transferase P                                       | 0 | 0 |
| GT251_HUMAN | COLGALT1 | Procollagen galactosyltransferase 1                               | 0 | 0 |
| HCD2_HUMAN  | HSD17B10 | 3-hydroxyacyl-CoA dehydrogenase type-2                            | 0 | 0 |
| HMOX2_HUMAN | HMOX2    | Heme oxygenase 2                                                  | 0 | 0 |
| HNRH3_HUMAN | HNRNPH3  | Heterogeneous nuclear ribonucleoprotein H3                        | 0 | 0 |
| HNRPF_HUMAN | HNRNPF   | Heterogeneous nuclear ribonucleoprotein F                         | 0 | 0 |
| HNRPL_HUMAN | HNRNPL   | Heterogeneous nuclear ribonucleoprotein L                         | 0 | 0 |
| HNRPO_HUMAN | SYNCRIP  | Heterogeneous nuclear ribonucleoprotein Q                         | 0 | 0 |
| HPRT1_HUMAN | HPRT1    | Hypoxanthine-guanine phosphoribosyltransferase                    | 0 | 0 |
| HSDL2_HUMAN | HSDL2    | Hydroxysteroid dehydrogenase-like protein 2                       | 0 | 0 |
| HSP74_HUMAN | HSPA4    | Heat shock 70 kDa protein 4                                       | 0 | 0 |
| HXK1_HUMAN  | HK1      | Hexokinase-1                                                      | 0 | 0 |
| HYOU1_HUMAN | HYOU1    | Hypoxia up-regulated protein 1                                    | 0 | 0 |
| IBP7_HUMAN  | IGFBP7   | Insulin-like growth factor-binding protein 7                      | 0 | 0 |
| IDH3A_HUMAN | IDH3A    | Isocitrate dehydrogenase [NAD] subunit alpha, mitochondrial       | 0 | 0 |
| IDHP_HUMAN  | IDH2     | Isocitrate dehydrogenase [NADP], mitochondrial                    | 0 | 0 |
| IF2B2_HUMAN | IGF2BP2  | Insulin-like growth factor 2 mRNA-binding protein 2               | 0 | 0 |
| IF2B3_HUMAN | IGF2BP3  | Insulin-like growth factor 2 mRNA-binding protein 3               | 0 | 0 |
| IF2G_HUMAN  | EIF2S3   | Eukaryotic translation initiation factor 2 subunit 3              | 0 | 0 |

|             |          |                                                                                                                 |   |   |
|-------------|----------|-----------------------------------------------------------------------------------------------------------------|---|---|
| IF4A1_HUMAN | EIF4A1   | Eukaryotic initiation factor 4A-1                                                                               | 0 | 0 |
| IF4G1_HUMAN | EIF4G1   | Eukaryotic translation initiation factor 4 gamma 1                                                              | 0 | 0 |
| IF4H_HUMAN  | EIF4H    | Eukaryotic translation initiation factor 4H                                                                     | 0 | 0 |
| IF5A1_HUMAN | EIF5A    | Eukaryotic translation initiation factor 5A-1                                                                   | 0 | 0 |
| IMA1_HUMAN  | KPNA2    | Importin subunit alpha-1                                                                                        | 0 | 0 |
| IMA7_HUMAN  | KPNA6    | Importin subunit alpha-7                                                                                        | 0 | 0 |
| IMB1_HUMAN  | KPNB1    | Importin subunit beta-1                                                                                         | 0 | 0 |
| ISG15_HUMAN | ISG15    | Ubiquitin-like protein ISG15                                                                                    | 0 | 0 |
| K22E_HUMAN  | KRT2     | Keratin, type II cytoskeletal 2 epidermal                                                                       | 0 | 0 |
| KAD2_HUMAN  | AK2      | Adenylate kinase 2, mitochondrial                                                                               | 0 | 0 |
| KAP2_HUMAN  | PRKAR2A  | cAMP-dependent protein kinase type II-alpha regulatory subunit                                                  | 0 | 0 |
| KCC2D_HUMAN | CAMK2D   | Calcium/calmodulin-dependent protein kinase type II subunit delta                                               | 0 | 0 |
| KCD12_HUMAN | KCTD12   | BTB/POZ domain-containing protein KCTD12                                                                        | 0 | 0 |
| KCY_HUMAN   | CMPK1    | UMP-CMP kinase                                                                                                  | 0 | 0 |
| KINH_HUMAN  | KIF5B    | Kinesin-1 heavy chain                                                                                           | 0 | 0 |
| KITH_HUMAN  | TK1      | Thymidine kinase, cytosolic                                                                                     | 0 | 0 |
| KTHY_HUMAN  | DTYMK    | Thymidylate kinase                                                                                              | 0 | 0 |
| LAP2B_HUMAN | TMPO     | Lamina-associated polypeptide 2, isoforms beta/gamma                                                            | 0 | 0 |
| LASP1_HUMAN | LASP1    | LIM and SH3 domain protein 1                                                                                    | 0 | 0 |
| LGUL_HUMAN  | GLO1     | Lactoylglutathione lyase                                                                                        | 0 | 0 |
| LMAN1_HUMAN | LMAN1    | Protein ERGIC-53                                                                                                | 0 | 0 |
| LMAN2_HUMAN | LMAN2    | Vesicular integral-membrane protein VIP36                                                                       | 0 | 0 |
| LMNB2_HUMAN | LMNB2    | Lamin-B2                                                                                                        | 0 | 0 |
| LONM_HUMAN  | LONP1    | Lon protease homolog, mitochondrial                                                                             | 0 | 0 |
| LPPRC_HUMAN | LRPPRC   | Leucine-rich PPR motif-containing protein, mitochondrial                                                        | 0 | 0 |
| LRC59_HUMAN | LRRCS9   | Leucine-rich repeat-containing protein 59                                                                       | 0 | 0 |
| LUZP1_HUMAN | LUZP1    | Leucine zipper protein 1                                                                                        | 0 | 0 |
| MACF1_HUMAN | MACF1    | Microtubule-actin cross-linking factor 1, isoforms 1/2/3/5                                                      | 0 | 0 |
| MANF_HUMAN  | MANF     | Mesencephalic astrocyte-derived neurotrophic factor                                                             | 0 | 0 |
| MAOM_HUMAN  | ME2      | NAD-dependent malic enzyme, mitochondrial                                                                       | 0 | 0 |
| MAP1A_HUMAN | MAP1A    | Microtubule-associated protein 1A                                                                               | 0 | 0 |
| MBNL1_HUMAN | MBNL1    | Muscleblind-like protein 1                                                                                      | 0 | 0 |
| MBOA7_HUMAN | MBOAT7   | Lysophospholipid acyltransferase 7                                                                              | 0 | 0 |
| MCM7_HUMAN  | MCM7     | DNA replication licensing factor MCM7                                                                           | 0 | 0 |
| MDHM_HUMAN  | MDH2     | Malate dehydrogenase, mitochondrial                                                                             | 0 | 0 |
| METK2_HUMAN | MAT2A    | S-adenosylmethionine synthase isoform type-2                                                                    | 0 | 0 |
| MIC19_HUMAN | CHCHD3   | MICOS complex subunit MIC19                                                                                     | 0 | 0 |
| MIC60_HUMAN | IMMT     | MICOS complex subunit MIC60                                                                                     | 0 | 0 |
| ML12A_HUMAN | MYL12A   | Myosin regulatory light chain 12A                                                                               | 0 | 0 |
| MPCP_HUMAN  | SLC25A3  | Phosphate carrier protein, mitochondrial                                                                        | 0 | 0 |
| MPRI_HUMAN  | IGF2R    | Cation-independent mannose-6-phosphate receptor                                                                 | 0 | 0 |
| MTA2_HUMAN  | MTA2     | Metastasis-associated protein MTA2                                                                              | 0 | 0 |
| MTCH2_HUMAN | MTCH2    | Mitochondrial carrier homolog 2                                                                                 | 0 | 0 |
| MYH10_HUMAN | MYH10    | Myosin-10                                                                                                       | 0 | 0 |
| MYO1B_HUMAN | MYO1B    | Unconventional myosin-Ib                                                                                        | 0 | 0 |
| MYO6_HUMAN  | MYO6     | Unconventional myosin-VI                                                                                        | 0 | 0 |
| NAMPT_HUMAN | NAMPT    | Nicotinamide phosphoribosyltransferase                                                                          | 0 | 0 |
| NB5R3_HUMAN | CY5R3    | NADH-cytochrome b5 reductase 3                                                                                  | 0 | 0 |
| NCEH1_HUMAN | NCEH1    | Neutral cholesterol ester hydrolase 1                                                                           | 0 | 0 |
| NCLN_HUMAN  | NCLN     | Nicalin                                                                                                         | 0 | 0 |
| NDUA8_HUMAN | NDUF8    | NADH dehydrogenase [ubiquinone] 1 alpha subcomplex subunit 8                                                    | 0 | 0 |
| NDUB9_HUMAN | NDUF9    | NADH dehydrogenase [ubiquinone] 1 beta subcomplex subunit 9                                                     | 0 | 0 |
| NDUS1_HUMAN | NDUF51   | NADH-ubiquinone oxidoreductase 75 kDa subunit, mitochondrial                                                    | 0 | 0 |
| NDUS3_HUMAN | NDUF53   | NADH dehydrogenase [ubiquinone] iron-sulfur protein 3, mitochondrial                                            | 0 | 0 |
| NDUS6_HUMAN | NDUF56   | NADH dehydrogenase [ubiquinone] iron-sulfur protein 6, mitochondrial                                            | 0 | 0 |
| NDUV1_HUMAN | NDUFV1   | NADH dehydrogenase [ubiquinone] flavoprotein 1, mitochondrial                                                   | 0 | 0 |
| NFKB2_HUMAN | NFKB2    | Nuclear factor NF-kappa-B p100 subunit                                                                          | 0 | 0 |
| NHRF1_HUMAN | SLC9A3R1 | Na(+)/H(+) exchange regulatory cofactor NHE-RF1                                                                 | 0 | 0 |
| NLTP_HUMAN  | SCP2     | Non-specific lipid-transfer protein                                                                             | 0 | 0 |
| NONO_HUMAN  | NONO     | Non-POU domain-containing octamer-binding protein                                                               | 0 | 0 |
| NP11L_HUMAN | NAP11L   | Nucleosome assembly protein 1-like 1                                                                            | 0 | 0 |
| NSF_HUMAN   | NSF      | Vesicle-fusing ATPase                                                                                           | 0 | 0 |
| NSFL1_HUMAN | NSFL1C   | NSFL1 cofactor p47                                                                                              | 0 | 0 |
| NSUN2_HUMAN | NSUN2    | tRNA (cytosine(34)-C(5))-methyltransferase                                                                      | 0 | 0 |
| NUDT5_HUMAN | NUDT5    | ADP-sugar pyrophosphatase                                                                                       | 0 | 0 |
| NUMA1_HUMAN | NUMA1    | Nuclear mitotic apparatus protein 1                                                                             | 0 | 0 |
| NUP93_HUMAN | NUP93    | Nuclear pore complex protein Nup93                                                                              | 0 | 0 |
| ODO1_HUMAN  | OGDH     | 2-oxoglutarate dehydrogenase, mitochondrial                                                                     | 0 | 0 |
| ODO2_HUMAN  | DLST     | Dihydropolyllysine-residue succinyltransferase component of 2-oxoglutarate dehydrogenase complex, mitochondrial | 0 | 0 |
| ODP2_HUMAN  | DLAT     | Dihydropolyllysine-residue acetyltransferase component of pyruvate dehydrogenase complex, mitochondrial         | 0 | 0 |
| ODPA_HUMAN  | PDHA1    | Pyruvate dehydrogenase E1 component subunit alpha, somatic form, mitochondrial                                  | 0 | 0 |
| ODPB_HUMAN  | PDHB     | Pyruvate dehydrogenase E1 component subunit beta, mitochondrial                                                 | 0 | 0 |
| OSBP1_HUMAN | OSBP     | Oxysterol-binding protein 1                                                                                     | 0 | 0 |
| OST48_HUMAN | DDOST    | Dolichyl-diphosphooligosaccharide-protein glycosyltransferase 48 kDa subunit                                    | 0 | 0 |
| P4HA1_HUMAN | P4HA1    | Prolyl 4-hydroxylase subunit alpha-1                                                                            | 0 | 0 |
| P4HA2_HUMAN | P4HA2    | Prolyl 4-hydroxylase subunit alpha-2                                                                            | 0 | 0 |
| P53_HUMAN   | TP53     | Cellular tumor antigen p53                                                                                      | 0 | 0 |
| P5CS_HUMAN  | ALDH18A1 | Delta-1-pyrroline-5-carboxylate synthase                                                                        | 0 | 0 |
| PA2G4_HUMAN | PA2G4    | Proliferation-associated protein 2G4                                                                            | 0 | 0 |
| PABP4_HUMAN | PABPC4   | Polyadenylate-binding protein 4                                                                                 | 0 | 0 |
| PAPS2_HUMAN | PAPSS2   | Bifunctional 3'-phosphoadenosine 5'-phosphosulfate synthase 2                                                   | 0 | 0 |
| PARK7_HUMAN | PARK7    | Protein deglycase DJ-1                                                                                          | 0 | 0 |
| PCBP1_HUMAN | PCBP1    | Poly(rC)-binding protein 1                                                                                      | 0 | 0 |
| PCH2_HUMAN  | TRIP13   | Pachytene checkpoint protein 2 homolog                                                                          | 0 | 0 |
| PDIA1_HUMAN | P4HB     | Protein disulfide-isomerase                                                                                     | 0 | 0 |
| PDIA4_HUMAN | PDIA4    | Protein disulfide-isomerase A4                                                                                  | 0 | 0 |
| PDIA6_HUMAN | PDIA6    | Protein disulfide-isomerase A6                                                                                  | 0 | 0 |
| PDLI5_HUMAN | PDLIM5   | PDZ and LIM domain protein 5                                                                                    | 0 | 0 |
| PGAM5_HUMAN | PGAM5    | Serine/threonine-protein phosphatase PGAM5, mitochondrial                                                       | 0 | 0 |
| PGRC1_HUMAN | PGRMC1   | Membrane-associated progesterone receptor component 1                                                           | 0 | 0 |
| PGRC2_HUMAN | PGRMC2   | Membrane-associated progesterone receptor component 2                                                           | 0 | 0 |
| PHB_HUMAN   | PHB      | Prohibitin                                                                                                      | 0 | 0 |

|              |          |                                                                          |   |   |
|--------------|----------|--------------------------------------------------------------------------|---|---|
| PHB2_HUMAN   | PHB2     | Prohibitin-2                                                             | 0 | 0 |
| PIMT_HUMAN   | PCMT1    | Protein-L-isoaspartate(D-aspartate) O-methyltransferase                  | 0 | 0 |
| PKN1_HUMAN   | PKN1     | Serine/threonine-protein kinase N1                                       | 0 | 0 |
| PLOD1_HUMAN  | PLOD1    | Procollagen-lysine,2-oxoglutarate 5-dioxygenase 1                        | 0 | 0 |
| PLOD3_HUMAN  | PLOD3    | Procollagen-lysine,2-oxoglutarate 5-dioxygenase 3                        | 0 | 0 |
| PML_HUMAN    | PML      | Protein PML                                                              | 0 | 0 |
| PNPT1_HUMAN  | PNPT1    | Polyribonucleotide nucleotidyltransferase 1, mitochondrial               | 0 | 0 |
| PODXL_HUMAN  | PODXL    | Podocalyxin                                                              | 0 | 0 |
| PPP1CB_HUMAN | PPP1CB   | Serine/threonine-protein phosphatase PP1-beta catalytic subunit          | 0 | 0 |
| PPIB_HUMAN   | PPIB     | Peptidyl-prolyl cis-trans isomerase B                                    | 0 | 0 |
| PRAF3_HUMAN  | ARL6IP5  | PRA1 family protein 3                                                    | 0 | 0 |
| PRDX2_HUMAN  | PRDX2    | Peroxiredoxin-2                                                          | 0 | 0 |
| PRDX4_HUMAN  | PRDX4    | Peroxiredoxin-4                                                          | 0 | 0 |
| PRS10_HUMAN  | PSMC6    | 26S protease regulatory subunit 10B                                      | 0 | 0 |
| PRS4_HUMAN   | PSMC1    | 26S protease regulatory subunit 4                                        | 0 | 0 |
| PRS6B_HUMAN  | PSMC4    | 26S protease regulatory subunit 6B                                       | 0 | 0 |
| PRS8_HUMAN   | PSMC5    | 26S protease regulatory subunit 8                                        | 0 | 0 |
| PSA2_HUMAN   | PSMA2    | Proteasome subunit alpha type-2                                          | 0 | 0 |
| PSA5_HUMAN   | PSMA5    | Proteasome subunit alpha type-5                                          | 0 | 0 |
| PSA6_HUMAN   | PSMA6    | Proteasome subunit alpha type-6                                          | 0 | 0 |
| PSD11_HUMAN  | PSMD11   | 26S proteasome non-ATPase regulatory subunit 11                          | 0 | 0 |
| PSD12_HUMAN  | PSMD12   | 26S proteasome non-ATPase regulatory subunit 12                          | 0 | 0 |
| PSMD1_HUMAN  | PSMD1    | 26S proteasome non-ATPase regulatory subunit 1                           | 0 | 0 |
| PSMD2_HUMAN  | PSMD2    | 26S proteasome non-ATPase regulatory subunit 2                           | 0 | 0 |
| PSMD4_HUMAN  | PSMD4    | 26S proteasome non-ATPase regulatory subunit 4                           | 0 | 0 |
| PSMD6_HUMAN  | PSMD6    | 26S proteasome non-ATPase regulatory subunit 6                           | 0 | 0 |
| PSMD7_HUMAN  | PSMD7    | 26S proteasome non-ATPase regulatory subunit 7                           | 0 | 0 |
| PSMD9_HUMAN  | PSMD9    | 26S proteasome non-ATPase regulatory subunit 9                           | 0 | 0 |
| PSPC1_HUMAN  | PSPC1    | Paraspeckle component 1                                                  | 0 | 0 |
| PTBP1_HUMAN  | PTBP1    | Polypyrimidine tract-binding protein 1                                   | 0 | 0 |
| PTN1_HUMAN   | PTPN1    | Tyrosine-protein phosphatase non-receptor type 1                         | 0 | 0 |
| PUR2_HUMAN   | GART     | Trifunctional purine biosynthetic protein adenosine-3                    | 0 | 0 |
| PUR9_HUMAN   | ATIC     | Bifunctional purine biosynthesis protein PURH                            | 0 | 0 |
| PURA2_HUMAN  | ADSS     | Adenylosuccinate synthetase isozyme 2                                    | 0 | 0 |
| PYC_HUMAN    | PC       | Pyruvate carboxylase, mitochondrial                                      | 0 | 0 |
| QCR1_HUMAN   | UQCRC1   | Cytochrome b-c1 complex subunit 1, mitochondrial                         | 0 | 0 |
| QCR2_HUMAN   | UQCRC2   | Cytochrome b-c1 complex subunit 2, mitochondrial                         | 0 | 0 |
| RAB18_HUMAN  | RAB18    | Ras-related protein Rab-18                                               | 0 | 0 |
| RAB21_HUMAN  | RAB21    | Ras-related protein Rab-21                                               | 0 | 0 |
| RAB23_HUMAN  | RAB23    | Ras-related protein Rab-23                                               | 0 | 0 |
| RAB2A_HUMAN  | RAB2A    | Ras-related protein Rab-2A                                               | 0 | 0 |
| RAB35_HUMAN  | RAB35    | Ras-related protein Rab-35                                               | 0 | 0 |
| RAGP1_HUMAN  | RANGAP1  | Ran GTPase-activating protein 1                                          | 0 | 0 |
| RALY_HUMAN   | RALY     | RNA-binding protein Raly                                                 | 0 | 0 |
| RB11B_HUMAN  | RAB11B   | Ras-related protein Rab-11B                                              | 0 | 0 |
| RBM14_HUMAN  | RBM14    | RNA-binding protein 14                                                   | 0 | 0 |
| RCN1_HUMAN   | RCN1     | Reticulocalbin-1                                                         | 0 | 0 |
| RENT1_HUMAN  | UPF1     | Regulator of nonsense transcripts 1                                      | 0 | 0 |
| RFA1_HUMAN   | RPA1     | Replication protein A 70 kDa DNA-binding subunit                         | 0 | 0 |
| RFC2_HUMAN   | RFC2     | Replication factor C subunit 2                                           | 0 | 0 |
| RGAP1_HUMAN  | RACGAP1  | Rac GTPase-activating protein 1                                          | 0 | 0 |
| RHOA_HUMAN   | RHOA     | Transforming protein RhoA                                                | 0 | 0 |
| RL34_HUMAN   | RPL34    | 60S ribosomal protein L34                                                | 0 | 0 |
| RM15_HUMAN   | MRPL15   | 39S ribosomal protein L15, mitochondrial                                 | 0 | 0 |
| RM23_HUMAN   | MRPL23   | 39S ribosomal protein L23, mitochondrial                                 | 0 | 0 |
| RM41_HUMAN   | MRPL41   | 39S ribosomal protein L41, mitochondrial                                 | 0 | 0 |
| RN213_HUMAN  | RNF213   | E3 ubiquitin-protein ligase RNF213                                       | 0 | 0 |
| ROA1_HUMAN   | HNRNPA1  | Heterogeneous nuclear ribonucleoprotein A1                               | 0 | 0 |
| RPN1_HUMAN   | RPN1     | Dolichyl-diphosphooligosaccharide-protein glycosyltransferase subunit 1  | 0 | 0 |
| RPN2_HUMAN   | RPN2     | Dolichyl-diphosphooligosaccharide-protein glycosyltransferase subunit 2  | 0 | 0 |
| RRAS2_HUMAN  | RRAS2    | Ras-related protein R-Ras2                                               | 0 | 0 |
| RTCB_HUMAN   | RTCB     | tRNA-splicing ligase RtcB homolog                                        | 0 | 0 |
| RYS2_HUMAN   | RYS2     | Ryanodine receptor 2                                                     | 0 | 0 |
| S61A1_HUMAN  | SEC61A1  | Protein transport protein Sec61 subunit alpha isoform 1                  | 0 | 0 |
| SAM50_HUMAN  | SAMM50   | Sorting and assembly machinery component 50 homolog                      | 0 | 0 |
| SAMH1_HUMAN  | SAMHD1   | Deoxynucleoside triphosphate triphosphohydrolase SAMHD1                  | 0 | 0 |
| SC22B_HUMAN  | SEC22B   | Vesicle-trafficking protein SEC22b                                       | 0 | 0 |
| SC23A_HUMAN  | SEC23A   | Protein transport protein Sec23A                                         | 0 | 0 |
| SC31A_HUMAN  | SEC31A   | Protein transport protein Sec31A                                         | 0 | 0 |
| SC61B_HUMAN  | SEC61B   | Protein transport protein Sec61 subunit beta                             | 0 | 0 |
| SCRB2_HUMAN  | SCARB2   | Lysosome membrane protein 2                                              | 0 | 0 |
| SCRN1_HUMAN  | SCRN1    | Secernin-1                                                               | 0 | 0 |
| SDHA_HUMAN   | SDHA     | Succinate dehydrogenase [ubiquinone] flavoprotein subunit, mitochondrial | 0 | 0 |
| SDPR_HUMAN   | SDPR     | Serum deprivation-response protein                                       | 0 | 0 |
| SEPT2_HUMAN  | SEPT2    | Septin-2                                                                 | 0 | 0 |
| SEPT7_HUMAN  | SEPT7    | Septin-7                                                                 | 0 | 0 |
| SERPH_HUMAN  | SERPINH1 | Serpin H1                                                                | 0 | 0 |
| SF3B3_HUMAN  | SF3B3    | Splicing factor 3B subunit 3                                             | 0 | 0 |
| SFPQ_HUMAN   | SFPQ     | Splicing factor, proline- and glutamine-rich                             | 0 | 0 |
| SFXN3_HUMAN  | SFXN3    | Sideroflexin-3                                                           | 0 | 0 |
| SH3G1_HUMAN  | SH3GL1   | Endophilin-A2                                                            | 0 | 0 |
| SH3L3_HUMAN  | SH3BGL3  | SH3 domain-binding glutamic acid-rich-like protein 3                     | 0 | 0 |
| SLIRP_HUMAN  | SLIRP    | SRA stem-loop-interacting RNA-binding protein, mitochondrial             | 0 | 0 |
| SMC1A_HUMAN  | SMC1A    | Structural maintenance of chromosomes protein 1A                         | 0 | 0 |
| SMC4_HUMAN   | SMC4     | Structural maintenance of chromosomes protein 4                          | 0 | 0 |
| SND1_HUMAN   | SND1     | Staphylococcal nuclease domain-containing protein 1                      | 0 | 0 |
| SNTB2_HUMAN  | SNTB2    | Beta-2-syntrophin                                                        | 0 | 0 |
| SNX3_HUMAN   | SNX3     | Sorting nexin-3                                                          | 0 | 0 |
| SNX6_HUMAN   | SNX6     | Sorting nexin-6                                                          | 0 | 0 |
| SODM_HUMAN   | SOD2     | Superoxide dismutase [Mn], mitochondrial                                 | 0 | 0 |
| SPEE_HUMAN   | SRM      | Spermidine synthase                                                      | 0 | 0 |
| SPTB2_HUMAN  | SPTBN1   | Spectrin beta chain, non-erythrocytic 1                                  | 0 | 0 |
| SPTN1_HUMAN  | SPTAN1   | Spectrin alpha chain, non-erythrocytic 1                                 | 0 | 0 |
| SQRD_HUMAN   | SQRDL    | Sulfide:quinone oxidoreductase, mitochondrial                            | 0 | 0 |

|             |          |                                                                       |   |   |
|-------------|----------|-----------------------------------------------------------------------|---|---|
| SRP14_HUMAN | SRP14    | Signal recognition particle 14 kDa protein                            | 0 | 0 |
| SRP68_HUMAN | SRP68    | Signal recognition particle subunit SRP68                             | 0 | 0 |
| SRPRB_HUMAN | SRPRB    | Signal recognition particle receptor subunit beta                     | 0 | 0 |
| SRSF9_HUMAN | SRSF9    | Serine/arginine-rich splicing factor 9                                | 0 | 0 |
| SSR4_HUMAN  | SSR4     | Translocon-associated protein subunit delta                           | 0 | 0 |
| STAT1_HUMAN | STAT1    | Signal transducer and activator of transcription 1-alpha/beta         | 0 | 0 |
| STIP1_HUMAN | STIP1    | Stress-induced-phosphoprotein 1                                       | 0 | 0 |
| STML2_HUMAN | STOML2   | Stomatin-like protein 2, mitochondrial                                | 0 | 0 |
| SUCB1_HUMAN | SUCLA2   | Succinyl-CoA ligase [ADP-forming] subunit beta, mitochondrial         | 0 | 0 |
| SUCB2_HUMAN | SUCLG2   | Succinyl-CoA ligase [GDP-forming] subunit beta, mitochondrial         | 0 | 0 |
| SUN2_HUMAN  | SUN2     | SUN domain-containing protein 2                                       | 0 | 0 |
| SYAC_HUMAN  | AARS     | Alanine-tRNA ligase, cytoplasmic                                      | 0 | 0 |
| SYDC_HUMAN  | DARS     | Aspartate-tRNA ligase, cytoplasmic                                    | 0 | 0 |
| SYFB_HUMAN  | FAR5B    | Phenylalanine-tRNA ligase beta subunit                                | 0 | 0 |
| SYG_HUMAN   | GARS     | Glycine-tRNA ligase                                                   | 0 | 0 |
| SYIM_HUMAN  | IARS2    | Isoleucine-tRNA ligase, mitochondrial                                 | 0 | 0 |
| SYK_HUMAN   | KARS     | Lysine-tRNA ligase                                                    | 0 | 0 |
| SYTC_HUMAN  | TARS     | Threonine-tRNA ligase, cytoplasmic                                    | 0 | 0 |
| SYVC_HUMAN  | VARS     | Valine-tRNA ligase                                                    | 0 | 0 |
| TADBP_HUMAN | TARDBP   | TAR DNA-binding protein 43                                            | 0 | 0 |
| TALDO_HUMAN | TALDO1   | Transaldolase                                                         | 0 | 0 |
| TBA1C_HUMAN | TUBA1C   | Tubulin alpha-1C chain                                                | 0 | 0 |
| TBB2B_HUMAN | TUBB2B   | Tubulin beta-2B chain                                                 | 0 | 0 |
| TBB4B_HUMAN | TUBB4B   | Tubulin beta-4B chain                                                 | 0 | 0 |
| TBCA_HUMAN  | TBCA     | Tubulin-specific chaperone A                                          | 0 | 0 |
| TCTP_HUMAN  | TPT1     | Translationally-controlled tumor protein                              | 0 | 0 |
| TES_HUMAN   | TES      | Testin                                                                | 0 | 0 |
| Tf65_HUMAN  | RELA     | Transcription factor p65                                              | 0 | 0 |
| THIL_HUMAN  | ACAT1    | Acetyl-CoA acetyltransferase, mitochondrial                           | 0 | 0 |
| THIO_HUMAN  | TXN      | Thioredoxin                                                           | 0 | 0 |
| TKT_HUMAN   | TKT      | Transketolase                                                         | 0 | 0 |
| TM205_HUMAN | TMEM205  | Transmembrane protein 205                                             | 0 | 0 |
| TM9S3_HUMAN | TM9SF3   | Transmembrane 9 superfamily member 3                                  | 0 | 0 |
| TMED7_HUMAN | TMED7    | Transmembrane emp24 domain-containing protein 7                       | 0 | 0 |
| TMEDA_HUMAN | TMED10   | Transmembrane emp24 domain-containing protein 10                      | 0 | 0 |
| TMM43_HUMAN | TMEM43   | Transmembrane protein 43                                              | 0 | 0 |
| TMOD3_HUMAN | TMOD3    | Tropomodulin-3                                                        | 0 | 0 |
| TMX1_HUMAN  | TMX1     | Thioredoxin-related transmembrane protein 1                           | 0 | 0 |
| TPM1_HUMAN  | TPM1     | Tropomyosin alpha-1 chain                                             | 0 | 0 |
| TPM4_HUMAN  | TPM4     | Tropomyosin alpha-4 chain                                             | 0 | 0 |
| TPR_HUMAN   | TPR      | Nucleoprotein TPR                                                     | 0 | 0 |
| TPSN_HUMAN  | TAPBP    | Tapasin                                                               | 0 | 0 |
| TR150_HUMAN | THRAP3   | Thyroid hormone receptor-associated protein 3                         | 0 | 0 |
| TRAP1_HUMAN | TRAP1    | Heat shock protein 75 kDa, mitochondrial                              | 0 | 0 |
| TRXR1_HUMAN | TXNRD1   | Thioredoxin reductase 1, cytoplasmic                                  | 0 | 0 |
| TTL12_HUMAN | TTL12    | Tubulin-tyrosine ligase-like protein 12                               | 0 | 0 |
| TXND5_HUMAN | TXNDC5   | Thioredoxin domain-containing protein 5                               | 0 | 0 |
| UACA_HUMAN  | UACA     | Uveal autoantigen with coiled-coil domains and ankyrin repeats        | 0 | 0 |
| UBP10_HUMAN | USP10    | Ubiquitin carboxyl-terminal hydrolase 10                              | 0 | 0 |
| UBP5_HUMAN  | USP5     | Ubiquitin carboxyl-terminal hydrolase 5                               | 0 | 0 |
| UBXN1_HUMAN | UBXN1    | UBX domain-containing protein 1                                       | 0 | 0 |
| UGGG1_HUMAN | UGGT1    | UDP-glucose:glycoprotein glucosyltransferase 1                        | 0 | 0 |
| VAPA_HUMAN  | VAPA     | Vesicle-associated membrane protein-associated protein A              | 0 | 0 |
| VAPB_HUMAN  | VAPB     | Vesicle-associated membrane protein-associated protein B/C            | 0 | 0 |
| VATA_HUMAN  | ATP6V1A  | V-type proton ATPase catalytic subunit A                              | 0 | 0 |
| VCAM1_HUMAN | VCAM1    | Vascular cell adhesion protein 1                                      | 0 | 0 |
| VDAC1_HUMAN | VDAC1    | Voltage-dependent anion-selective channel protein 1                   | 0 | 0 |
| VDAC2_HUMAN | VDAC2    | Voltage-dependent anion-selective channel protein 2                   | 0 | 0 |
| VIGLN_HUMAN | HDLBP    | Vigilin                                                               | 0 | 0 |
| VPS35_HUMAN | VPS35    | Vacuolar protein sorting-associated protein 35                        | 0 | 0 |
| VPS4B_HUMAN | VPS4B    | Vacuolar protein sorting-associated protein 4B                        | 0 | 0 |
| XPO2_HUMAN  | CSE1L    | Exportin-2                                                            | 0 | 0 |
| XRCC5_HUMAN | XRCC5    | X-ray repair cross-complementing protein 5                            | 0 | 0 |
| XRCC6_HUMAN | XRCC6    | X-ray repair cross-complementing protein 6                            | 0 | 0 |
| ZN185_HUMAN | ZNF185   | Zinc finger protein 185                                               | 0 | 0 |
| CD2A1_HUMAN | CDKN2A   | Cyclin-dependent kinase inhibitor 2A, isoforms 1/2/3                  | 0 | 0 |
| CS010_HUMAN | MYDGF    | UPF0556 protein C19orf10                                              | 0 | 0 |
| GCN1L_HUMAN | GCN1     | Translational activator GCN1                                          | 0 | 0 |
| 1B07_HUMAN  | HLA-B    | HLA class I histocompatibility antigen, B-7 alpha chain               | 0 | 0 |
| AIMP1_HUMAN | AIMP1    | Aminoacyl tRNA synthase complex-interacting multifunctional protein 1 | 0 | 0 |
| AK1A1_HUMAN | AKR1A1   | Alcohol dehydrogenase [NADP(+)]                                       | 0 | 0 |
| BAF_HUMAN   | BANF1    | Barrier-to-autointegration factor                                     | 0 | 0 |
| CALM_HUMAN  | CALM1    | Calmodulin                                                            | 0 | 0 |
| COPD_HUMAN  | ARCNI    | Coatomer subunit delta                                                | 0 | 0 |
| DDAH1_HUMAN | DDAH1    | N(G),N(G)-dimethylarginine dimethylaminohydrolase 1                   | 0 | 0 |
| DDX27_HUMAN | DDX27    | Probable ATP-dependent RNA helicase DDX27                             | 0 | 0 |
| FRIH_HUMAN  | FTH1     | Ferritin heavy chain                                                  | 0 | 0 |
| H13_HUMAN   | HIST1H1D | Histone H1.3                                                          | 0 | 0 |
| H15_HUMAN   | HIST1H1B | Histone H1.5                                                          | 0 | 0 |
| H2AV_HUMAN  | H2AFV    | Histone H2A.V                                                         | 0 | 0 |
| H2AY_HUMAN  | H2AFY    | Core histone macro-H2A.1                                              | 0 | 0 |
| K1C10_HUMAN | KRT10    | Keratin, type I cytoskeletal 10                                       | 0 | 0 |
| K1C9_HUMAN  | KRT9     | Keratin, type I cytoskeletal 9                                        | 0 | 0 |
| LAMA5_HUMAN | LAMA5    | Laminin subunit alpha-5                                               | 0 | 0 |
| LAMB1_HUMAN | LAMB1    | Laminin subunit beta-1                                                | 0 | 0 |
| LDLR_HUMAN  | LDLR     | Low-density lipoprotein receptor                                      | 0 | 0 |
| LG3BP_HUMAN | LGALS3BP | Galectin-3-binding protein                                            | 0 | 0 |
| LOXL2_HUMAN | LOXL2    | Lysyl oxidase homolog 2                                               | 0 | 0 |
| LTOR1_HUMAN | LAMTOR1  | Ragulator complex protein LAMTOR1                                     | 0 | 0 |
| MARCS_HUMAN | MARCKS   | Myristoylated alanine-rich C-kinase substrate                         | 0 | 0 |
| MDR1_HUMAN  | ABC81    | Multidrug resistance protein 1                                        | 0 | 0 |
| MRT4_HUMAN  | MRT04    | mRNA turnover protein 4 homolog                                       | 0 | 0 |
| MYH11_HUMAN | MYH11    | Myosin-11                                                             | 0 | 0 |
| NDKB_HUMAN  | NME2     | Nucleoside diphosphate kinase B                                       | 0 | 0 |

|              |         |                                                                                               |   |   |
|--------------|---------|-----------------------------------------------------------------------------------------------|---|---|
| NOP2_HUMAN   | NOP2    | Probable 28S rRNA (cytosine(4447)-C(5))-methyltransferase                                     | 0 | 0 |
| PARP1_HUMAN  | PARP1   | Poly [ADP-ribose] polymerase 1                                                                | 0 | 0 |
| PSMB6_HUMAN  | PSMB6   | Proteasome subunit beta type-6                                                                | 0 | 0 |
| PTTG_HUMAN   | PTTG1IP | Pituitary tumor-transforming gene 1 protein-interacting protein                               | 0 | 0 |
| PYGM_HUMAN   | PYGM    | Glycogen phosphorylase, muscle form                                                           | 0 | 0 |
| RBM25_HUMAN  | RBM25   | RNA-binding protein 25                                                                        | 0 | 0 |
| RCC2_HUMAN   | RCC2    | Protein RCC2                                                                                  | 0 | 0 |
| RL26L_HUMAN  | RPL26L1 | 60S ribosomal protein L26-like 1                                                              | 0 | 0 |
| RL32_HUMAN   | RPL32   | 60S ribosomal protein L32                                                                     | 0 | 0 |
| RLA0_HUMAN   | RPLP0   | 60S acidic ribosomal protein P0                                                               | 0 | 0 |
| RS10_HUMAN   | RPS10   | 40S ribosomal protein S10                                                                     | 0 | 0 |
| RS24_HUMAN   | RPS24   | 40S ribosomal protein S24                                                                     | 0 | 0 |
| RS27_HUMAN   | RPS27   | 40S ribosomal protein S27                                                                     | 0 | 0 |
| RS30_HUMAN   | FAU     | 40S ribosomal protein S30                                                                     | 0 | 0 |
| RUXF_HUMAN   | SNRPF   | Small nuclear ribonucleoprotein F                                                             | 0 | 0 |
| SDCB1_HUMAN  | SDCBP   | Syntenin-1                                                                                    | 0 | 0 |
| SMCA5_HUMAN  | SMARCA5 | SWI/SNF-related matrix-associated actin-dependent regulator of chromatin subfamily A member 5 | 0 | 0 |
| SMD2_HUMAN   | SNRPD2  | Small nuclear ribonucleoprotein Sm D2                                                         | 0 | 0 |
| SP16H_HUMAN  | SUPT16H | FACT complex subunit SPT16                                                                    | 0 | 0 |
| SRSF10_HUMAN | SRSF10  | Serine/arginine-rich splicing factor 10                                                       | 0 | 0 |
| SRSF1_HUMAN  | SRSF1   | Serine/arginine-rich splicing factor 1                                                        | 0 | 0 |
| SYNC_HUMAN   | NARS    | Asparagine--tRNA ligase, cytoplasmic                                                          | 0 | 0 |
| TCP4_HUMAN   | SUB1    | Activated RNA polymerase II transcriptional coactivator p15                                   | 0 | 0 |
| TITIN_HUMAN  | TTN     | Titin                                                                                         | 0 | 0 |
| TOP1_HUMAN   | TOP1    | DNA topoisomerase 1                                                                           | 0 | 0 |
| TOP2A_HUMAN  | TOP2A   | DNA topoisomerase 2-alpha                                                                     | 0 | 0 |
| TPP2_HUMAN   | TPP2    | Tripeptidyl-peptidase 2                                                                       | 0 | 0 |
| TSR1_HUMAN   | TSR1    | Pre-rRNA-processing protein TSR1 homolog                                                      | 0 | 0 |
| VAMP3_HUMAN  | VAMP3   | Vesicle-associated membrane protein 3                                                         | 0 | 0 |
| YBOX1_HUMAN  | YBX1    | Nuclease-sensitive element-binding protein 1                                                  | 0 | 0 |
| 2A5D_HUMAN   | PPP2R5D | Serine/threonine-protein phosphatase 2A 56 kDa regulatory subunit delta isoform               | 0 | 0 |
| 2AAB_HUMAN   | PPP2R1B | Serine/threonine-protein phosphatase 2A 65 kDa regulatory subunit A beta isoform              | 0 | 0 |
| 3MG_HUMAN    | MPG     | DNA-3-methyladenine glycosylase                                                               | 0 | 0 |
| 6PGD_HUMAN   | PGD     | 6-phosphogluconate dehydrogenase, decarboxylating                                             | 0 | 0 |
| 6PGL_HUMAN   | PGLS    | 6-phosphogluconolactonase                                                                     | 0 | 0 |
| AAPK1_HUMAN  | PRKAA1  | 5'-AMP-activated protein kinase catalytic subunit alpha-1                                     | 0 | 0 |
| AASD1_HUMAN  | AARSD1  | Alanyl-tRNA editing protein Aarsd1                                                            | 0 | 0 |
| AATC_HUMAN   | GOT1    | Aspartate aminotransferase, cytoplasmic                                                       | 0 | 0 |
| ABCA1_HUMAN  | ABCA1   | ATP-binding cassette sub-family A member 1                                                    | 0 | 0 |
| ABCF1_HUMAN  | ABCF1   | ATP-binding cassette sub-family F member 1                                                    | 0 | 0 |
| ABCF3_HUMAN  | ABCF3   | ATP-binding cassette sub-family F member 3                                                    | 0 | 0 |
| ABLM3_HUMAN  | ABLM3   | Actin-binding LIM protein 3                                                                   | 0 | 0 |
| ABRAL_HUMAN  | ABRACL  | Costars family protein ABRACL                                                                 | 0 | 0 |
| ACADM_HUMAN  | ACADM   | Medium-chain specific acyl-CoA dehydrogenase, mitochondrial                                   | 0 | 0 |
| ACADV_HUMAN  | ACADVL  | Very long-chain specific acyl-CoA dehydrogenase, mitochondrial                                | 0 | 0 |
| ACAP1_HUMAN  | ACAP1   | Arf-GAP with coiled-coil, ANK repeat and PH domain-containing protein 1                       | 0 | 0 |
| ACINU_HUMAN  | ACIN1   | Apoptotic chromatin condensation inducer in the nucleus                                       | 0 | 0 |
| ACTL6A_HUMAN | ACTL6A  | Actin-like protein 6A                                                                         | 0 | 0 |
| ACOC_HUMAN   | ACO1    | Cytoplasmic aconitate hydratase                                                               | 0 | 0 |
| ADHX_HUMAN   | ADH5    | Alcohol dehydrogenase class-3                                                                 | 0 | 0 |
| ADIRF_HUMAN  | ADIRF   | Adipogenesis regulatory factor                                                                | 0 | 0 |
| ADPGK_HUMAN  | ADPGK   | ADP-dependent glucokinase                                                                     | 0 | 0 |
| AGFG1_HUMAN  | AGFG1   | Arf-GAP domain and FG repeat-containing protein 1                                             | 0 | 0 |
| AGM1_HUMAN   | PGM3    | Phosphoacetylglucosamine mutase                                                               | 0 | 0 |
| AHNAK2_HUMAN | AHNAK2  | Protein AHNAK2                                                                                | 0 | 0 |
| AIMP2_HUMAN  | AIMP2   | Aminoacyl tRNA synthase complex-interacting multifunctional protein 2                         | 0 | 0 |
| AIX_HUMAN    | INA     | Alpha-internexin                                                                              | 0 | 0 |
| AIP_HUMAN    | AIP     | AH receptor-interacting protein                                                               | 0 | 0 |
| AKAP2_HUMAN  | AKAP2   | A-kinase anchor protein 2                                                                     | 0 | 0 |
| AL7A1_HUMAN  | ALDH7A1 | Alpha-aminoadipic semialdehyde dehydrogenase                                                  | 0 | 0 |
| ALDOC_HUMAN  | ALDOC   | Fructose-bisphosphate aldolase C                                                              | 0 | 0 |
| AN32A_HUMAN  | ANP32A  | Acidic leucine-rich nuclear phosphoprotein 32 family member A                                 | 0 | 0 |
| AN32B_HUMAN  | ANP32B  | Acidic leucine-rich nuclear phosphoprotein 32 family member B                                 | 0 | 0 |
| AN32C_HUMAN  | ANP32C  | Acidic leucine-rich nuclear phosphoprotein 32 family member C                                 | 0 | 0 |
| AN32E_HUMAN  | ANP32E  | Acidic leucine-rich nuclear phosphoprotein 32 family member E                                 | 0 | 0 |
| ANFY1_HUMAN  | ANKFY1  | Rabankyrin-5                                                                                  | 0 | 0 |
| ANM1_HUMAN   | PRMT1   | Protein arginine N-methyltransferase 1                                                        | 0 | 0 |
| ANM5_HUMAN   | PRMT5   | Protein arginine N-methyltransferase 5                                                        | 0 | 0 |
| ANR11_HUMAN  | ANKRD11 | Ankyrin repeat domain-containing protein 11                                                   | 0 | 0 |
| ANR26_HUMAN  | ANKRD26 | Ankyrin repeat domain-containing protein 26                                                   | 0 | 0 |
| AP1B1_HUMAN  | AP1B1   | AP-1 complex subunit beta-1                                                                   | 0 | 0 |
| AP1G1_HUMAN  | AP1G1   | AP-1 complex subunit gamma-1                                                                  | 0 | 0 |
| AP1M1_HUMAN  | AP1M1   | AP-1 complex subunit mu-1                                                                     | 0 | 0 |
| AP1S1_HUMAN  | AP1S1   | AP-1 complex subunit sigma-1A                                                                 | 0 | 0 |
| AP2M1_HUMAN  | AP2M1   | AP-2 complex subunit mu                                                                       | 0 | 0 |
| AP3B1_HUMAN  | AP3B1   | AP-3 complex subunit beta-1                                                                   | 0 | 0 |
| AP4A_HUMAN   | NUDT2   | Bis(5'-nucleosyl)-tetraphosphatase [asymmetrical]                                             | 0 | 0 |
| APC7_HUMAN   | ANAPC7  | Anaphase-promoting complex subunit 7                                                          | 0 | 0 |
| APEX1_HUMAN  | APEX1   | DNA-(apurinic or apyrimidinic site) lyase                                                     | 0 | 0 |
| API5_HUMAN   | API5    | Apoptosis inhibitor 5                                                                         | 0 | 0 |
| APT_HUMAN    | APRT    | Adenine phosphoribosyltransferase                                                             | 0 | 0 |
| AR6P4_HUMAN  | ARL6P4  | ADP-ribosylation factor-like protein 6-interacting protein 4                                  | 0 | 0 |
| ARFG2_HUMAN  | ARFGAP2 | ADP-ribosylation factor GTPase-activating protein 2                                           | 0 | 0 |
| ARFG3_HUMAN  | ARFGAP3 | ADP-ribosylation factor GTPase-activating protein 3                                           | 0 | 0 |
| ARHG2_HUMAN  | ARHGEF2 | Rho guanine nucleotide exchange factor 2                                                      | 0 | 0 |
| ARHL2_HUMAN  | ADPRHL2 | Poly(ADP-ribose) glycohydrolase ARH3                                                          | 0 | 0 |
| ARI1A_HUMAN  | ARID1A  | AT-rich interactive domain-containing protein 1A                                              | 0 | 0 |
| ARL8B_HUMAN  | ARL8B   | ADP-ribosylation factor-like protein 8B                                                       | 0 | 0 |
| ASML_HUMAN   | ASMTL   | N-acetylsertotonin O-methyltransferase-like protein                                           | 0 | 0 |
| ASNA_HUMAN   | ASNA1   | ATPase ASNA1                                                                                  | 0 | 0 |
| ASPH_HUMAN   | ASPH    | Aspartyl/asparaginyl beta-hydroxylase                                                         | 0 | 0 |
| AT2A3_HUMAN  | ATP2A3  | Sarcoplasmic/endoplasmic reticulum calcium ATPase 3                                           | 0 | 0 |
| AT5F1_HUMAN  | ATP5F1  | ATP synthase F(0) complex subunit B1, mitochondrial                                           | 0 | 0 |

|              |           |                                                                                |   |
|--------------|-----------|--------------------------------------------------------------------------------|---|
| ATD3A_HUMAN  | ATAD3A    | ATPase family AAA domain-containing protein 3A                                 | o |
| ATL3_HUMAN   | ATL3      | Atlastin-3                                                                     | o |
| ATOX1_HUMAN  | ATOX1     | Copper transport protein ATOX1                                                 | o |
| ATRIIP_HUMAN | ATRIIP    | ATR-interacting protein                                                        | o |
| ATRX_HUMAN   | ATRX      | Transcriptional regulator ATRX                                                 | o |
| ATX10_HUMAN  | ATXN10    | Ataxin-10                                                                      | o |
| ATX2_HUMAN   | ATXN2     | Ataxin-2                                                                       | o |
| ATX2L_HUMAN  | ATXN2L    | Ataxin-2-like protein                                                          | o |
| AXDN1_HUMAN  | AXDN1     | Axonemal dynein light chain domain-containing protein 1                        | o |
| BABA1_HUMAN  | BABAM1    | BRISC and BRCA1-A complex member 1                                             | o |
| BAG2_HUMAN   | BAG2      | BAG family molecular chaperone regulator 2                                     | o |
| BAP29_HUMAN  | BCAP29    | B-cell receptor-associated protein 29                                          | o |
| BAP31_HUMAN  | BCAP31    | B-cell receptor-associated protein 31                                          | o |
| BAX_HUMAN    | BAX       | Apoptosis regulator BAX                                                        | o |
| BAZZA_HUMAN  | BAZZA     | Bromodomain adjacent to zinc finger domain protein 2A                          | o |
| BID_HUMAN    | BID       | BH3-interacting domain death agonist                                           | o |
| BIEA_HUMAN   | BLVRA     | Biliverdin reductase A                                                         | o |
| BIN1_HUMAN   | BIN1      | Myc box-dependent-interacting protein 1                                        | o |
| BLM_HUMAN    | BLM       | Bloom syndrome protein                                                         | o |
| BLMH_HUMAN   | BLMH      | Bleomycin hydrolase                                                            | o |
| BMS1_HUMAN   | BMS1      | Ribosome biogenesis protein BMS1 homolog                                       | o |
| BOLA2_HUMAN  | BOLA2     | BolA-like protein 2                                                            | o |
| BOP1_HUMAN   | BOP1      | Ribosome biogenesis protein BOP1                                               | o |
| BT3L4_HUMAN  | BTF3L4    | Transcription factor BTF3 homolog 4                                            | o |
| BUB3_HUMAN   | BUB3      | Mitotic checkpoint protein BUB3                                                | o |
| BZW2_HUMAN   | BZW2      | Basic leucine zipper and W2 domain-containing protein 2                        | o |
| C10_HUMAN    | C12orf57  | Protein C10                                                                    | o |
| C2D1A_HUMAN  | CC2D1A    | Coiled-coil and C2 domain-containing protein 1A                                | o |
| CA167_HUMAN  | C1orf167  | Uncharacterized protein C1orf167                                               | o |
| CAF1B_HUMAN  | CHAF1B    | Chromatin assembly factor 1 subunit B                                          | o |
| CAH2_HUMAN   | CA2       | Carbonic anhydrase 2                                                           | o |
| CAND1_HUMAN  | CAND1     | Cullin-associated NEDD8-dissociated protein 1                                  | o |
| CANT1_HUMAN  | CANT1     | Soluble calcium-activated nucleotidase 1                                       | o |
| CAPG_HUMAN   | CAPG      | Macrophage-capping protein                                                     | o |
| CAPZB_HUMAN  | CAPZB     | F-actin-capping protein subunit beta                                           | o |
| CARF_HUMAN   | CDKN2AIP  | CDKN2A-interacting protein                                                     | o |
| CASP1_HUMAN  | CASP1     | Caspase-1                                                                      | o |
| CASP7_HUMAN  | CASP7     | Caspase-7                                                                      | o |
| CASPC_HUMAN  | CASP12    | Inactive caspase-12                                                            | o |
| CATB_HUMAN   | CTSB      | Cathepsin B                                                                    | o |
| CATD_HUMAN   | CTSD      | Cathepsin D                                                                    | o |
| CAZA2_HUMAN  | CAPZA2    | F-actin-capping protein subunit alpha-2                                        | o |
| CBR1_HUMAN   | CBR1      | Carbonyl reductase [NADPH] 1                                                   | o |
| CBR3_HUMAN   | CBR3      | Carbonyl reductase [NADPH] 3                                                   | o |
| CBX5_HUMAN   | CBX5      | Chromobox protein homolog 5                                                    | o |
| CC124_HUMAN  | CCDC124   | Coiled-coil domain-containing protein 124                                      | o |
| CCAR2_HUMAN  | CCAR2     | Cell cycle and apoptosis regulator protein 2                                   | o |
| CCG6_HUMAN   | CACNG6    | Voltage-dependent calcium channel gamma-6 subunit                              | o |
| CD11B_HUMAN  | CDK11B    | Cyclin-dependent kinase 11B                                                    | o |
| CD9_HUMAN    | CD9       | CD9 antigen                                                                    | o |
| CDC23_HUMAN  | CDC23     | Cell division cycle protein 23 homolog                                         | o |
| CDC37_HUMAN  | CDC37     | Hsp90 co-chaperone Cdc37                                                       | o |
| CDC5L_HUMAN  | CDC5L     | Cell division cycle 5-like protein                                             | o |
| CDK1_HUMAN   | CDK1      | Cyclin-dependent kinase 1                                                      | o |
| CDK2_HUMAN   | CDK2      | Cyclin-dependent kinase 2                                                      | o |
| CDV3_HUMAN   | CDV3      | Protein CDV3 homolog                                                           | o |
| CELF1_HUMAN  | CELF1     | CUGBP Elav-like family member 1                                                | o |
| CENPF_HUMAN  | CENPF     | Centromere protein F                                                           | o |
| CEP55_HUMAN  | CEP55     | Centrosomal protein of 55 kDa                                                  | o |
| CHCH2_HUMAN  | CHCH2     | Coiled-coil-helix-coiled-coil-helix domain-containing protein 2, mitochondrial | o |
| CHD4_HUMAN   | CHD4      | Chromodomain-helicase-DNA-binding protein 4                                    | o |
| CHD5_HUMAN   | CHD5      | Chromodomain-helicase-DNA-binding protein 5                                    | o |
| CHERP_HUMAN  | CHERP     | Calcium homeostasis endoplasmic reticulum protein                              | o |
| CHMP6_HUMAN  | CHMP6     | Charged multivesicular body protein 6                                          | o |
| C114_HUMAN   | C9orf114  | Putative methyltransferase C9orf114                                            | o |
| CIRBP_HUMAN  | CIRBP     | Cold-inducible RNA-binding protein                                             | o |
| CK054_HUMAN  | C11orf54  | Ester hydrolase C11orf54                                                       | o |
| CK068_HUMAN  | C11orf68  | UPF0696 protein C11orf68                                                       | o |
| CKAP5_HUMAN  | CKAP5     | Cytoskeleton-associated protein 5                                              | o |
| CLIC4_HUMAN  | CLIC4     | Chloride intracellular channel protein 4                                       | o |
| CLIP1_HUMAN  | CLIP1     | CAP-Gly domain-containing linker protein 1                                     | o |
| CLPP_HUMAN   | CLPP      | ATP-dependent Clp protease proteolytic subunit, mitochondrial                  | o |
| CLPT1_HUMAN  | CLPTM1    | Cleft lip and palate transmembrane protein 1                                   | o |
| CLPX_HUMAN   | CLPX      | ATP-dependent Clp protease ATP-binding subunit clpX-like, mitochondrial        | o |
| CLU_HUMAN    | CLUH      | Clustered mitochondria protein homolog                                         | o |
| CMC2_HUMAN   | SLC25A13  | Calcium-binding mitochondrial carrier protein Aralar2                          | o |
| CMPK2_HUMAN  | CMPK2     | UMP-CMP kinase 2, mitochondrial                                                | o |
| CMYA5_HUMAN  | CMYA5     | Cardiomyopathy-associated protein 5                                            | o |
| CN166_HUMAN  | C14orf166 | UPF0568 protein C14orf166                                                      | o |
| CNBP_HUMAN   | CNBP      | Cellular nucleic acid-binding protein                                          | o |
| CND1_HUMAN   | NCAPD2    | Condensin complex subunit 1                                                    | o |
| CNDP2_HUMAN  | CNDP2     | Cytosolic non-specific dipeptidase                                             | o |
| CNN2_HUMAN   | CNN2      | Calponin-2                                                                     | o |
| CNN3_HUMAN   | CNN3      | Calponin-3                                                                     | o |
| CNRP1_HUMAN  | CNRIP1    | CB1 cannabinoid receptor-interacting protein 1                                 | o |
| COL9A2_HUMAN | COL9A2    | Collagen alpha-2(I) chain                                                      | o |
| COASY_HUMAN  | COASY     | Bifunctional coenzyme A synthase                                               | o |
| COPB_HUMAN   | COPB1     | Coatamer subunit beta                                                          | o |
| COPE_HUMAN   | COPE      | Coatamer subunit epsilon                                                       | o |
| COPZ1_HUMAN  | COPZ1     | Coatamer subunit zeta-1                                                        | o |
| CORO7_HUMAN  | CORO7     | Coronin-7                                                                      | o |
| COTL1_HUMAN  | COTL1     | Coactosin-like protein                                                         | o |
| CP131_HUMAN  | CEP131    | Centrosomal protein of 131 kDa                                                 | o |
| CP27B_HUMAN  | CYP27B1   | 25-hydroxyvitamin D-1 alpha hydroxylase, mitochondrial                         | o |

|              |          |                                                                    |   |
|--------------|----------|--------------------------------------------------------------------|---|
| CPIN1_HUMAN  | CIAPIN1  | Anamorsin                                                          | o |
| CPNE1_HUMAN  | CPNE1    | Copine-1                                                           | o |
| CPNS1_HUMAN  | CAPNS1   | Calpain small subunit 1                                            | o |
| CPSF1_HUMAN  | CPSF1    | Cleavage and polyadenylation specificity factor subunit 1          | o |
| CPSF5_HUMAN  | NUDT21   | Cleavage and polyadenylation specificity factor subunit 5          | o |
| CPSF6_HUMAN  | CPSF6    | Cleavage and polyadenylation specificity factor subunit 6          | o |
| CPSF7_HUMAN  | CPSF7    | Cleavage and polyadenylation specificity factor subunit 7          | o |
| CRIP2_HUMAN  | CRIP2    | Cysteine-rich protein 2                                            | o |
| CRK_HUMAN    | CRK      | Adapter molecule crk                                               | o |
| CRNL1_HUMAN  | CRNL1    | Crooked neck-like protein 1                                        | o |
| CROCC_HUMAN  | CROCC    | Rootletin                                                          | o |
| CSN1_HUMAN   | GPS1     | COP9 signalosome complex subunit 1                                 | o |
| CSN2_HUMAN   | COPS2    | COP9 signalosome complex subunit 2                                 | o |
| CSN3_HUMAN   | COPS3    | COP9 signalosome complex subunit 3                                 | o |
| CSN4_HUMAN   | COPS4    | COP9 signalosome complex subunit 4                                 | o |
| CSN6_HUMAN   | COPS6    | COP9 signalosome complex subunit 6                                 | o |
| CSN8_HUMAN   | COPS8    | COP9 signalosome complex subunit 8                                 | o |
| CSTF1_HUMAN  | CSTF1    | Cleavage stimulation factor subunit 1                              | o |
| CSTF2_HUMAN  | CSTF2    | Cleavage stimulation factor subunit 2                              | o |
| CTBL1_HUMAN  | CTNNB1   | Beta-catenin-like protein 1                                        | o |
| CTBP1_HUMAN  | CTBP1    | C-terminal-binding protein 1                                       | o |
| CUL4B_HUMAN  | CUL4B    | Cullin-4B                                                          | o |
| CUL5_HUMAN   | CUL5     | Cullin-5                                                           | o |
| CX7A2_HUMAN  | COX7A2   | Cytochrome c oxidase subunit 7A2, mitochondrial                    | o |
| CYB5B_HUMAN  | CYB5B    | Cytochrome b5 type B                                               | o |
| CYBP_HUMAN   | CACYBP   | Calcyclin-binding protein                                          | o |
| CYC_HUMAN    | CYCS     | Cytochrome c                                                       | o |
| CYTB_HUMAN   | CSTB     | Cystatin-B                                                         | o |
| CYTSA_HUMAN  | SPECC1L  | Cytospin-A                                                         | o |
| DAXX_HUMAN   | DAXX     | Death domain-associated protein 6                                  | o |
| DAZP1_HUMAN  | DAZAP1   | DAZ-associated protein 1                                           | o |
| DBNL_HUMAN   | DBNL     | Drebrin-like protein                                               | o |
| DC1L2_HUMAN  | DYNC1L2  | Cytoplasmic dynein 1 light intermediate chain 2                    | o |
| DCPS_HUMAN   | DCPS     | m7GpppX diphosphatase                                              | o |
| DCTN2_HUMAN  | DCTN2    | Dynactin subunit 2                                                 | o |
| DCTP1_HUMAN  | DCTPP1   | dCTP pyrophosphatase 1                                             | o |
| DCUP_HUMAN   | UROD     | Uroporphyrinogen decarboxylase                                     | o |
| DDAH2_HUMAN  | DDAH2    | N(G),N(G)-dimethylarginine dimethylaminohydrolase 2                | o |
| DDB1_HUMAN   | DDB1     | DNA damage-binding protein 1                                       | o |
| DDX1_HUMAN   | DDX1     | ATP-dependent RNA helicase DDX1                                    | o |
| DDX24_HUMAN  | DDX24    | ATP-dependent RNA helicase DDX24                                   | o |
| DDX42_HUMAN  | DDX42    | ATP-dependent RNA helicase DDX42                                   | o |
| DDX46_HUMAN  | DDX46    | Probable ATP-dependent RNA helicase DDX46                          | o |
| DDX50_HUMAN  | DDX50    | ATP-dependent RNA helicase DDX50                                   | o |
| DDX56_HUMAN  | DDX56    | Probable ATP-dependent RNA helicase DDX56                          | o |
| DDX58_HUMAN  | DDX58    | Probable ATP-dependent RNA helicase DDX58                          | o |
| DDX6_HUMAN   | DDX6     | Probable ATP-dependent RNA helicase DDX6                           | o |
| DEK_HUMAN    | DEK      | Protein DEK                                                        | o |
| DENR_HUMAN   | DENR     | Density-regulated protein                                          | o |
| DERL1_HUMAN  | DERL1    | Derlin-1                                                           | o |
| DFFA_HUMAN   | DFFA     | DNA fragmentation factor subunit alpha                             | o |
| DHB12_HUMAN  | HSD17B12 | Very-long-chain 3-oxoacyl-CoA reductase                            | o |
| DHX15_HUMAN  | DHX15    | Putative pre-mRNA-splicing factor ATP-dependent RNA helicase DHX15 | o |
| DHX29_HUMAN  | DHX29    | ATP-dependent RNA helicase DHX29                                   | o |
| DHX30_HUMAN  | DHX30    | Putative ATP-dependent RNA helicase DHX30                          | o |
| DIAPH1_HUMAN | DIAPH1   | Protein diaphanous homolog 1                                       | o |
| DJB11_HUMAN  | DNAJB11  | DnaJ homolog subfamily B member 11                                 | o |
| DKC1_HUMAN   | DKC1     | H/ACA ribonucleoprotein complex subunit 4                          | o |
| DNJC1_HUMAN  | DNJC1    | DnaJ homolog subfamily C member 1                                  | o |
| DNJC2_HUMAN  | DNJC2    | DnaJ homolog subfamily C member 2                                  | o |
| DNJC7_HUMAN  | DNJC7    | DnaJ homolog subfamily C member 7                                  | o |
| DNJC9_HUMAN  | DNJC9    | DnaJ homolog subfamily C member 9                                  | o |
| DNM1L_HUMAN  | DNM1L    | Dynammin-1-like protein                                            | o |
| DNPEP_HUMAN  | DNPEP    | Aspartyl aminopeptidase                                            | o |
| DOHH_HUMAN   | DOHH     | Deoxyhypusine hydroxylase                                          | o |
| DPM3_HUMAN   | DPM3     | Dolichol-phosphate mannosyltransferase subunit 3                   | o |
| DPOLA_HUMAN  | POLA1    | DNA polymerase alpha catalytic subunit                             | o |
| DPP3_HUMAN   | DPP3     | Dipeptidyl peptidase 3                                             | o |
| DPP9_HUMAN   | DPP9     | Dipeptidyl peptidase 9                                             | o |
| DRG1_HUMAN   | DRG1     | Developmentally-regulated GTP-binding protein 1                    | o |
| DTD1_HUMAN   | DTD1     | D-tyrosyl-tRNA(Tyr) deacylase 1                                    | o |
| DTX3L_HUMAN  | DTX3L    | E3 ubiquitin-protein ligase DTX3L                                  | o |
| DX39B_HUMAN  | DDX39B   | Spliceosome RNA helicase DDX39B                                    | o |
| DYH10_HUMAN  | DNAH10   | Dynein heavy chain 10, axonemal                                    | o |
| DYH2_HUMAN   | DNAH2    | Dynein heavy chain 2, axonemal                                     | o |
| DYL1_HUMAN   | DYNLL1   | Dynein light chain 1, cytoplasmic                                  | o |
| DYN3_HUMAN   | DNM3     | Dynammin-3                                                         | o |
| E2AK2_HUMAN  | EIF2AK2  | Interferon-induced, double-stranded RNA-activated protein kinase   | o |
| EBP2_HUMAN   | EBNA1BP2 | Probable rRNA-processing protein EBP2                              | o |
| ECE1_HUMAN   | ECE1     | Endothelin-converting enzyme 1                                     | o |
| ECI1_HUMAN   | ECI1     | Enoyl-CoA delta isomerase 1, mitochondrial                         | o |
| ECM29_HUMAN  | ECM29    | Proteasome-associated protein ECM29 homolog                        | o |
| EDF1_HUMAN   | EDF1     | Endothelial differentiation-related factor 1                       | o |
| EEA1_HUMAN   | EEA1     | Early endosome antigen 1                                           | o |
| EEF1A2_HUMAN | EEF1A2   | Elongation factor 1-alpha 2                                        | o |
| EFCC1_HUMAN  | EFCC1    | EF-hand and coiled-coil domain-containing protein 1                | o |
| EGLN1_HUMAN  | EGLN1    | Egl nine homolog 1                                                 | o |
| EHD2_HUMAN   | EHD2     | EH domain-containing protein 2                                     | o |
| EHD4_HUMAN   | EHD4     | EH domain-containing protein 4                                     | o |
| EI2BD_HUMAN  | EIF2B4   | Translation initiation factor eIF-2B subunit delta                 | o |
| EIF1B_HUMAN  | EIF1B    | Eukaryotic translation initiation factor 1b                        | o |
| EIF2A_HUMAN  | EIF2A    | Eukaryotic translation initiation factor 2A                        | o |
| EIF3E_HUMAN  | EIF3E    | Eukaryotic translation initiation factor 3 subunit E               | o |
| EIF3F_HUMAN  | EIF3F    | Eukaryotic translation initiation factor 3 subunit F               | o |

|             |           |                                                                            |   |
|-------------|-----------|----------------------------------------------------------------------------|---|
| EIF3G_HUMAN | EIF3G     | Eukaryotic translation initiation factor 3 subunit G                       | o |
| EIF3K_HUMAN | EIF3K     | Eukaryotic translation initiation factor 3 subunit K                       | o |
| EIF3L_HUMAN | EIF3L     | Eukaryotic translation initiation factor 3 subunit L                       | o |
| ELAV1_HUMAN | ELAVL1    | ELAV-like protein 1                                                        | o |
| ELOB_HUMAN  | TCEB2     | Transcription elongation factor B polypeptide 2                            | o |
| ELOC_HUMAN  | TCEB1     | Transcription elongation factor B polypeptide 1                            | o |
| EMAL4_HUMAN | EML4      | Echinoderm microtubule-associated protein-like 4                           | o |
| EMC2_HUMAN  | EMC2      | ER membrane protein complex subunit 2                                      | o |
| ENAM_HUMAN  | ENAM      | Enamelin                                                                   | o |
| ENOG_HUMAN  | ENO2      | Gamma-enolase                                                              | o |
| ENOPH_HUMAN | ENOPH1    | Enolase-phosphatase E1                                                     | o |
| EP15R_HUMAN | EPS15L1   | Epidermal growth factor receptor substrate 15-like 1                       | o |
| EPN4_HUMAN  | CLINT1    | Clathrin interactor 1                                                      | o |
| ERF1_HUMAN  | ETF1      | Eukaryotic peptide chain release factor subunit 1                          | o |
| ERH_HUMAN   | ERH       | Enhancer of rudimentary homolog                                            | o |
| ERO1A_HUMAN | ERO1A     | ERO1-like protein alpha                                                    | o |
| ES8L2_HUMAN | EPS8L2    | Epidermal growth factor receptor kinase substrate 8-like protein 2         | o |
| EWS_HUMAN   | EWSR1     | RNA-binding protein EWS                                                    | o |
| EXOC8_HUMAN | EXOC8     | Exocyst complex component 8                                                | o |
| EXOS2_HUMAN | EXOSC2    | Exosome complex component RRP4                                             | o |
| EXOS4_HUMAN | EXOSC4    | Exosome complex component RRP41                                            | o |
| EXOS5_HUMAN | EXOSC5    | Exosome complex component RRP46                                            | o |
| EXOS6_HUMAN | EXOSC6    | Exosome complex component MTR3                                             | o |
| EXOSX_HUMAN | EXOSC10   | Exosome component 10                                                       | o |
| F10A1_HUMAN | ST13      | Hsc70-interacting protein                                                  | o |
| F192A_HUMAN | FAM192A   | Protein FAM192A                                                            | o |
| FA21A_HUMAN | FAM21A    | WASH complex subunit FAM21A                                                | o |
| FA49B_HUMAN | FAM49B    | Protein FAM49B                                                             | o |
| FA50A_HUMAN | FAM50A    | Protein FAM50A                                                             | o |
| FA98A_HUMAN | FAM98A    | Protein FAM98A                                                             | o |
| FA98B_HUMAN | FAM98B    | Protein FAM98B                                                             | o |
| FAAA_HUMAN  | FAH       | Fumarylacetoacetase                                                        | o |
| FABP5_HUMAN | FABP5     | Fatty acid-binding protein, epidermal                                      | o |
| FACD2_HUMAN | FANCD2    | Fanconi anemia group D2 protein                                            | o |
| FADS2_HUMAN | FADS2     | Fatty acid desaturase 2                                                    | o |
| FAF2_HUMAN  | FAF2      | FAS-associated factor 2                                                    | o |
| FDFT_HUMAN  | FDFT1     | Squalene synthase                                                          | o |
| FEN1_HUMAN  | FEN1      | Flap endonuclease 1                                                        | o |
| FHAD1_HUMAN | FHAD1     | Forkhead-associated domain-containing protein 1                            | o |
| FHL1_HUMAN  | FHL1      | Four and a half LIM domains protein 1                                      | o |
| FIP1_HUMAN  | FIP1L1    | Pre-mRNA 3'-end-processing factor FIP1                                     | o |
| FIS1_HUMAN  | FIS1      | Mitochondrial fission 1 protein                                            | o |
| FKB1A_HUMAN | FKBP1A    | Peptidyl-prolyl cis-trans isomerase FKBP1A                                 | o |
| FKBP3_HUMAN | FKBP3     | Peptidyl-prolyl cis-trans isomerase FKBP3                                  | o |
| FKBP4_HUMAN | FKBP4     | Peptidyl-prolyl cis-trans isomerase FKBP4                                  | o |
| FKBP5_HUMAN | FKBP5     | Peptidyl-prolyl cis-trans isomerase FKBP5                                  | o |
| FL2D_HUMAN  | WTAP      | Pre-mRNA-splicing regulator WTAP                                           | o |
| FPP5_HUMAN  | FDPS      | Farnesyl pyrophosphate synthase                                            | o |
| FUMH_HUMAN  | FH        | Fumarate hydratase, mitochondrial                                          | o |
| FUS_HUMAN   | FUS       | RNA-binding protein FUS                                                    | o |
| FXR2_HUMAN  | FXR2      | Fragile X mental retardation syndrome-related protein 2                    | o |
| G6PI_HUMAN  | GPI       | Glucose-6-phosphate isomerase                                              | o |
| GAPD1_HUMAN | GAPVD1    | GTPase-activating protein and VPS9 domain-containing protein 1             | o |
| GBB3_HUMAN  | GNB3      | Guanine nucleotide-binding protein G(I)/G(S)/G(T) subunit beta-3           | o |
| GBF1_HUMAN  | GBF1      | Golgi-specific brefeldin A-resistance guanine nucleotide exchange factor 1 | o |
| GBP1_HUMAN  | GBP1      | Interferon-induced guanylate-binding protein 1                             | o |
| GBP4_HUMAN  | GBP4      | Guanylate-binding protein 4                                                | o |
| GCP2_HUMAN  | TUBGCP2   | Gamma-tubulin complex component 2                                          | o |
| GCP60_HUMAN | ACBD3     | Golgi resident protein GCP60                                               | o |
| GDIA_HUMAN  | GD1       | Rab GDP dissociation inhibitor alpha                                       | o |
| GEM15_HUMAN | GEMIN5    | Gem-associated protein 5                                                   | o |
| GLCM_HUMAN  | GBA       | Glucosylceramidase                                                         | o |
| GLGB_HUMAN  | GBE1      | 1,4-alpha-glucan-branching enzyme                                          | o |
| GLRX1_HUMAN | GLRX      | Glutaredoxin-1                                                             | o |
| GLRX3_HUMAN | GLRX3     | Glutaredoxin-3                                                             | o |
| GLSK_HUMAN  | GLS       | Glutaminase kidney isoform, mitochondrial                                  | o |
| GMPPA_HUMAN | GMPPA     | Mannose-1-phosphate guanyltransferase alpha                                | o |
| GMPPB_HUMAN | GMPPB     | Mannose-1-phosphate guanyltransferase beta                                 | o |
| GMPR2_HUMAN | GMPR2     | GMP reductase 2                                                            | o |
| GNL1_HUMAN  | GNL1      | Guanine nucleotide-binding protein-like 1                                  | o |
| GNS_HUMAN   | GNS       | N-acetylglucosamine-6-sulfatase                                            | o |
| GOGA2_HUMAN | GOLGA2    | Golgin subfamily A member 2                                                | o |
| GORS2_HUMAN | GORASP2   | Golgi reassembly-stacking protein 2                                        | o |
| GRAP1_HUMAN | GRIPAP1   | GRIP1-associated protein 1                                                 | o |
| GRB2_HUMAN  | GRB2      | Growth factor receptor-bound protein 2                                     | o |
| GRHPR_HUMAN | GRHPR     | Glyoxylate reductase/hydroxypyruvate reductase                             | o |
| GRPE1_HUMAN | GRPEL1    | GrpE protein homolog 1, mitochondrial                                      | o |
| GSTO1_HUMAN | GSTO1     | Glutathione S-transferase omega-1                                          | o |
| GTF2I_HUMAN | GTF2I     | General transcription factor II-I                                          | o |
| GUAH_HUMAN  | GMPS      | GMP synthase [glutamine-hydrolyzing]                                       | o |
| GWL_HUMAN   | MASTL     | Serine/threonine-protein kinase greatwall                                  | o |
| H10_HUMAN   | H1FO      | Histone H1.0                                                               | o |
| H14_HUMAN   | HIST1H1E  | Histone H1.4                                                               | o |
| H2A1D_HUMAN | HIST1H2AD | Histone H2A type 1-D                                                       | o |
| H2B1B_HUMAN | HIST1H2BB | Histone H2B type 1-B                                                       | o |
| H2B1K_HUMAN | HIST1H2BK | Histone H2B type 1-K                                                       | o |
| H32_HUMAN   | HIST2H3A  | Histone H3.2                                                               | o |
| HAP28_HUMAN | PDAP1     | 28 kDa heat- and acid-stable phosphoprotein                                | o |
| HCDH_HUMAN  | HADH      | Hydroxyacyl-coenzyme A dehydrogenase, mitochondrial                        | o |
| HCFC1_HUMAN | HCFC1     | Host cell factor 1                                                         | o |
| HCLS1_HUMAN | HCLS1     | Hematopoietic lineage cell-specific protein                                | o |
| HDAC2_HUMAN | HDAC2     | Histone deacetylase 2                                                      | o |
| HDGF_HUMAN  | HDGF      | Hepatoma-derived growth factor                                             | o |
| HDHD2_HUMAN | HDHD2     | Haloacid dehalogenase-like hydrolase domain-containing protein 2           | o |



|             |          |                                                                             |   |
|-------------|----------|-----------------------------------------------------------------------------|---|
| HECD1_HUMAN | HECTD1   | E3 ubiquitin-protein ligase HECTD1                                          | o |
| HECD3_HUMAN | HECTD3   | E3 ubiquitin-protein ligase HECTD3                                          | o |
| HELZ2_HUMAN | HELZ2    | Helicase with zinc finger domain 2                                          | o |
| HGS_HUMAN   | HGS      | Hepatocyte growth factor-regulated tyrosine kinase substrate                | o |
| HIG2A_HUMAN | HIGD2A   | HIG1 domain family member 2A, mitochondrial                                 | o |
| HINT1_HUMAN | HINT1    | Histidine triad nucleotide-binding protein 1                                | o |
| HIP1R_HUMAN | HIP1R    | Huntingtin-interacting protein 1-related protein                            | o |
| HM20A_HUMAN | HMG20A   | High mobility group protein 20A                                             | o |
| HMC51_HUMAN | HMGCS1   | Hydroxymethylglutaryl-CoA synthase, cytoplasmic                             | o |
| HMG2A_HUMAN | HMG2A    | High mobility group protein HMG1-C                                          | o |
| HMG81_HUMAN | HMG81    | High mobility group protein B1                                              | o |
| HMG82_HUMAN | HMG82    | High mobility group protein B2                                              | o |
| HMG83_HUMAN | HMG83    | High mobility group protein B3                                              | o |
| HMG2_HUMAN  | HMG2     | Non-histone chromosomal protein HMG-17                                      | o |
| HN1L_HUMAN  | HN1L     | Hematological and neurological expressed 1-like protein                     | o |
| HNRDL_HUMAN | HNRNPD   | Heterogeneous nuclear ribonucleoprotein D-like                              | o |
| HNRH2_HUMAN | HNRNPH2  | Heterogeneous nuclear ribonucleoprotein H2                                  | o |
| HNRL1_HUMAN | HNRNPUL1 | Heterogeneous nuclear ribonucleoprotein U-like protein 1                    | o |
| HNRL2_HUMAN | HNRNPUL2 | Heterogeneous nuclear ribonucleoprotein U-like protein 2                    | o |
| HNRL3_HUMAN | HNRNPL3  | Heterogeneous nuclear ribonucleoprotein L-like                              | o |
| HNRPD_HUMAN | HNRNPD   | Heterogeneous nuclear ribonucleoprotein D0                                  | o |
| HOOK3_HUMAN | HOOK3    | Protein Hook homolog 3                                                      | o |
| HTRA2_HUMAN | HTRA2    | Serine protease HTRA2, mitochondrial                                        | o |
| HUNK_HUMAN  | HUNK     | Hormonally up-regulated neu tumor-associated kinase                         | o |
| HUWE1_HUMAN | HUWE1    | E3 ubiquitin-protein ligase HUWE1                                           | o |
| IAH1_HUMAN  | IAH1     | Isoamyl acetate-hydrolyzing esterase 1 homolog                              | o |
| IASPP_HUMAN | PPP1R13L | RelA-associated inhibitor                                                   | o |
| ICAL_HUMAN  | CAST     | Calpastatin                                                                 | o |
| IDH1_HUMAN  | IDH1     | Isocitrate dehydrogenase [NADP] cytoplasmic                                 | o |
| IDI1_HUMAN  | IDI1     | Isopentenyl-diphosphate Delta-isomerase 1                                   | o |
| IF16_HUMAN  | IF16     | Gamma-interferon-inducible protein 16                                       | o |
| IF1AX_HUMAN | EIF1AX   | Eukaryotic translation initiation factor 1A, X-chromosomal                  | o |
| IF2A_HUMAN  | EIF2S1   | Eukaryotic translation initiation factor 2 subunit 1                        | o |
| IF2B_HUMAN  | EIF2S2   | Eukaryotic translation initiation factor 2 subunit 2                        | o |
| IF2B1_HUMAN | IGF2BP1  | Insulin-like growth factor 2 mRNA-binding protein 1                         | o |
| IF4A3_HUMAN | IF4A3    | Eukaryotic initiation factor 4A-III                                         | o |
| IF4B_HUMAN  | EIF4B    | Eukaryotic translation initiation factor 4B                                 | o |
| IF4E_HUMAN  | EIF4E    | Eukaryotic translation initiation factor 4E                                 | o |
| IF4G2_HUMAN | EIF4G2   | Eukaryotic translation initiation factor 4 gamma 2                          | o |
| IF5_HUMAN   | EIF5     | Eukaryotic translation initiation factor 5                                  | o |
| IF144_HUMAN | IF144    | Interferon-induced protein 44                                               | o |
| IFIT1_HUMAN | IFIT1    | Interferon-induced protein with tetratricopeptide repeats 1                 | o |
| IFIT2_HUMAN | IFIT2    | Interferon-induced protein with tetratricopeptide repeats 2                 | o |
| IFIT3_HUMAN | IFIT3    | Interferon-induced protein with tetratricopeptide repeats 3                 | o |
| IFIX_HUMAN  | PYHIN1   | Pyrin and HIN domain-containing protein 1                                   | o |
| ILF2_HUMAN  | ILF2     | Interleukin enhancer-binding factor 2                                       | o |
| ILF3_HUMAN  | ILF3     | Interleukin enhancer-binding factor 3                                       | o |
| ILKAP_HUMAN | ILKAP    | Integrin-linked kinase-associated serine/threonine phosphatase 2C           | o |
| IMA3_HUMAN  | KPNA4    | Importin subunit alpha-3                                                    | o |
| IMA4_HUMAN  | KPNA3    | Importin subunit alpha-4                                                    | o |
| IMP3_HUMAN  | IMP3     | U3 small nucleolar ribonucleoprotein protein IMP3                           | o |
| IMPA1_HUMAN | IMPA1    | Inositol monophosphatase 1                                                  | o |
| IN35_HUMAN  | IFI35    | Interferon-induced 35 kDa protein                                           | o |
| IPO5_HUMAN  | IPO5     | Importin-5                                                                  | o |
| IPO7_HUMAN  | IPO7     | Importin-7                                                                  | o |
| IPO9_HUMAN  | IPO9     | Importin-9                                                                  | o |
| IPP2M_HUMAN | PPP1R2P3 | Protein phosphatase inhibitor 2-like protein 3                              | o |
| IPYR_HUMAN  | PPA1     | Inorganic pyrophosphatase                                                   | o |
| ISG20_HUMAN | ISG20    | Interferon-stimulated gene 20 kDa protein                                   | o |
| ITPR2_HUMAN | ITPR2    | Inositol 1,4,5-trisphosphate receptor type 2                                | o |
| JIP4_HUMAN  | SPAG9    | C-Jun-amino-terminal kinase-interacting protein 4                           | o |
| K2C1B_HUMAN | KRT77    | Keratin, type II cytoskeletal 1b                                            | o |
| KAD1_HUMAN  | AK1      | Adenylate kinase isoenzyme 1                                                | o |
| KAPCA_HUMAN | PRKACA   | cAMP-dependent protein kinase catalytic subunit alpha                       | o |
| KBP_HUMAN   | KIF1BP   | KIF1-binding protein                                                        | o |
| KC1D_HUMAN  | CSNK1D   | Casein kinase I isoform delta                                               | o |
| KDEL2_HUMAN | KDEL2    | KDEL motif-containing protein 2                                             | o |
| KHDR1_HUMAN | KHDRBS1  | KH domain-containing, RNA-binding, signal transduction-associated protein 1 | o |
| KI67_HUMAN  | MKI67    | Antigen KI-67                                                               | o |
| KIF11_HUMAN | KIF11    | Kinesin-like protein KIF11                                                  | o |
| KIFC1_HUMAN | KIFC1    | Kinesin-like protein KIFC1                                                  | o |
| KRI1_HUMAN  | KRI1     | Protein KRI1 homolog                                                        | o |
| KS6A4_HUMAN | RPS6KA4  | Ribosomal protein S6 kinase alpha-4                                         | o |
| KTN1_HUMAN  | KTN1     | Kinetin                                                                     | o |
| LA_HUMAN    | SSB      | Lupus La protein                                                            | o |
| LAP2A_HUMAN | TMPO     | Lamina-associated polypeptide 2, isoform alpha                              | o |
| LARP4_HUMAN | LARP4    | La-related protein 4                                                        | o |
| LC7L3_HUMAN | LUC7L3   | Luc7-like protein 3                                                         | o |
| LEG3_HUMAN  | LGALS3   | Galectin-3                                                                  | o |
| LETM1_HUMAN | LETM1    | LETM1 and EF-hand domain-containing protein 1, mitochondrial                | o |
| LIMA1_HUMAN | LIMA1    | LIM domain and actin-binding protein 1                                      | o |
| LIMD1_HUMAN | LIMD1    | LIM domain-containing protein 1                                             | o |
| LIMS1_HUMAN | LIMS1    | LIM and senescent cell antigen-like-containing domain protein 1             | o |
| LIS1_HUMAN  | PAFAH1B1 | Platelet-activating factor acetylhydrolase IB subunit alpha                 | o |
| LKHA4_HUMAN | LTA4H    | Leukotriene A-4 hydrolase                                                   | o |
| LMNB1_HUMAN | LMNB1    | Lamin-B1                                                                    | o |
| LMO7_HUMAN  | LMO7     | LIM domain only protein 7                                                   | o |
| LPP_HUMAN   | LPP      | Lipoma-preferred partner                                                    | o |
| LRC47_HUMAN | LRR47    | Leucine-rich repeat-containing protein 47                                   | o |
| LRRF1_HUMAN | LRRF1P1  | Leucine-rich repeat flightless-interacting protein 1                        | o |
| LRWD1_HUMAN | LRWD1    | Leucine-rich repeat and WD repeat-containing protein 1                      | o |
| LSM3_HUMAN  | LSM3     | U6 snRNA-associated Sm-like protein Lsm3                                    | o |
| LSM8_HUMAN  | LSM8     | U6 snRNA-associated Sm-like protein Lsm8                                    | o |
| LUC7L_HUMAN | LUC7L    | Putative RNA-binding protein Luc7-like 1                                    | o |

|              |          |                                                                              |   |
|--------------|----------|------------------------------------------------------------------------------|---|
| LYP1A1_HUMAN | LYPLA1   | Acyl-protein thioesterase 1                                                  | o |
| MA2OM_HUMAN  | SLC25A11 | Mitochondrial 2-oxoglutarate/malate carrier protein                          | o |
| MA7D1_HUMAN  | MAP7D1   | MAP7 domain-containing protein 1                                             | o |
| MAGD2_HUMAN  | MAGED2   | Melanoma-associated antigen D2                                               | o |
| MAK16_HUMAN  | MAK16    | Protein MAK16 homolog                                                        | o |
| MAP1B_HUMAN  | MAP1B    | Microtubule-associated protein 1B                                            | o |
| MAP2_HUMAN   | METAP2   | Methionine aminopeptidase 2                                                  | o |
| MARE1_HUMAN  | MAPRE1   | Microtubule-associated protein RP/EB family member 1                         | o |
| MAT2B_HUMAN  | MAT2B    | Methionine adenosyltransferase 2 subunit beta                                | o |
| MBB1A_HUMAN  | MYBBP1A  | Myb-binding protein 1A                                                       | o |
| MBD3_HUMAN   | MBD3     | Methyl-CpG-binding domain protein 3                                          | o |
| MCM2_HUMAN   | MCM2     | DNA replication licensing factor MCM2                                        | o |
| MCM3_HUMAN   | MCM3     | DNA replication licensing factor MCM3                                        | o |
| MCM4_HUMAN   | MCM4     | DNA replication licensing factor MCM4                                        | o |
| MCM5_HUMAN   | MCM5     | DNA replication licensing factor MCM5                                        | o |
| MCM6_HUMAN   | MCM6     | DNA replication licensing factor MCM6                                        | o |
| MCMBP_HUMAN  | MCMBP    | Mini-chromosome maintenance complex-binding protein                          | o |
| MCTS1_HUMAN  | MCTS1    | Malignant T-cell-amplified sequence 1                                        | o |
| MD1L1_HUMAN  | MAD1L1   | Mitotic spindle assembly checkpoint protein MAD1                             | o |
| MDC1_HUMAN   | MDC1     | Mediator of DNA damage checkpoint protein 1                                  | o |
| MED15_HUMAN  | MED15    | Mediator of RNA polymerase II transcription subunit 15                       | o |
| MED24_HUMAN  | MED24    | Mediator of RNA polymerase II transcription subunit 24                       | o |
| MEMO1_HUMAN  | MEMO1    | Protein MEMO1                                                                | o |
| MEP50_HUMAN  | WDR77    | Methylosome protein 50                                                       | o |
| MESD_HUMAN   | MESDC2   | LDLR chaperone MESD                                                          | o |
| METH_HUMAN   | MTR      | Methionine synthase                                                          | o |
| MFAP1_HUMAN  | MFAP1    | Microfibrillar-associated protein 1                                          | o |
| MFN1_HUMAN   | MFN1     | Mitofusin-1                                                                  | o |
| MFS6L_HUMAN  | MFSD6L   | Major facilitator superfamily domain-containing protein 6-like               | o |
| MGN2_HUMAN   | MAGOHB   | Protein mago nashi homolog 2                                                 | o |
| MK01_HUMAN   | MAPK1    | Mitogen-activated protein kinase 1                                           | o |
| MK03_HUMAN   | MAPK3    | Mitogen-activated protein kinase 3                                           | o |
| MMGT1_HUMAN  | MMGT1    | Membrane magnesium transporter 1                                             | o |
| MMS19_HUMAN  | MMS19    | MMS19 nucleotide excision repair protein homolog                             | o |
| MOFA1_HUMAN  | MRFAP1   | MORF4 family-associated protein 1                                            | o |
| MOV10_HUMAN  | MOV10    | Putative helicase MOV-10                                                     | o |
| MPP5_HUMAN   | MPP5     | MAGUK p55 subfamily member 5                                                 | o |
| MPRD_HUMAN   | M6PR     | Cation-dependent mannose-6-phosphate receptor                                | o |
| MPRIP_HUMAN  | MPRIP    | Myosin phosphatase Rho-interacting protein                                   | o |
| MRRP1_HUMAN  | TRMT10C  | Mitochondrial ribonuclease P protein 1                                       | o |
| MSH2_HUMAN   | MSH2     | DNA mismatch repair protein Msh2                                             | o |
| MSH6_HUMAN   | MSH6     | DNA mismatch repair protein Msh6                                             | o |
| MT2_HUMAN    | MT2A     | Metallothionein-2                                                            | o |
| MTAP_HUMAN   | MTAP     | S-methyl-5'-thioadenosine phosphorylase                                      | o |
| MTCL1_HUMAN  | MTCL1    | Microtubule cross-linking factor 1                                           | o |
| MTNA_HUMAN   | MRI1     | Methylthioribose-1-phosphate isomerase                                       | o |
| MTND_HUMAN   | ADI1     | 1,2-dihydroxy-3-keto-5-methylthiopentene dioxygenase                         | o |
| MTPN_HUMAN   | MTPN     | Myotrophin                                                                   | o |
| MTX1_HUMAN   | MTX1     | Metaxin-1                                                                    | o |
| MUTA_HUMAN   | MUT      | Methylmalonyl-CoA mutase, mitochondrial                                      | o |
| MX2_HUMAN    | MX2      | Interferon-induced GTP-binding protein Mx2                                   | o |
| MYG1_HUMAN   | C12orf10 | UPF0160 protein MYG1, mitochondrial                                          | o |
| MYH13_HUMAN  | MYH13    | Myosin-13                                                                    | o |
| MYH14_HUMAN  | MYH14    | Myosin-14                                                                    | o |
| MYLK_HUMAN   | MYLK     | Myosin light chain kinase, smooth muscle                                     | o |
| MYOME_HUMAN  | PDE4DIP  | Myomegalin                                                                   | o |
| NAA15_HUMAN  | NAA15    | N-alpha-acetyltransferase 15, NatA auxiliary subunit                         | o |
| NAA30_HUMAN  | NAA30    | N-alpha-acetyltransferase 30                                                 | o |
| NAA50_HUMAN  | NAA50    | N-alpha-acetyltransferase 50                                                 | o |
| NACAM_HUMAN  | NACA     | Nascent polypeptide-associated complex subunit alpha, muscle-specific form   | o |
| NAGK_HUMAN   | NAGK     | N-acetyl-D-glucosamine kinase                                                | o |
| NASP_HUMAN   | NASP     | Nuclear autoantigenic sperm protein                                          | o |
| NAV1_HUMAN   | NAV1     | Neuron navigator 1                                                           | o |
| NCP_R_HUMAN  | POR      | NADPH-cytochrome P450 reductase                                              | o |
| NDKA_HUMAN   | NME1     | Nucleoside diphosphate kinase A                                              | o |
| NDUA5_HUMAN  | NDUFA5   | NADH dehydrogenase [ubiquinone] 1 alpha subcomplex subunit 5                 | o |
| NDUA6_HUMAN  | NDUFA6   | NADH dehydrogenase [ubiquinone] 1 alpha subcomplex subunit 6                 | o |
| NDUAA_HUMAN  | NDUFA10  | NADH dehydrogenase [ubiquinone] 1 alpha subcomplex subunit 10, mitochondrial | o |
| NDUS8_HUMAN  | NDUFS8   | NADH dehydrogenase [ubiquinone] iron-sulfur protein 8, mitochondrial         | o |
| NECP2_HUMAN  | NECAP2   | Adaptin ear-binding coat-associated protein 2                                | o |
| NED4L_HUMAN  | NEDD4L   | E3 ubiquitin-protein ligase NEDD4-like                                       | o |
| NEDD8_HUMAN  | NEDD8    | NEDD8                                                                        | o |
| NEXN_HUMAN   | NEXN     | Nexilin                                                                      | o |
| NFH_HUMAN    | NEFH     | Neurofilament heavy polypeptide                                              | o |
| NFKB1_HUMAN  | NFKB1    | Nuclear factor NF-kappa-B p105 subunit                                       | o |
| NH2L1_HUMAN  | SNU13    | NHP2-like protein 1                                                          | o |
| NHLC2_HUMAN  | NHLRC2   | NHL repeat-containing protein 2                                              | o |
| NICA_HUMAN   | NCSTN    | Nicastrin                                                                    | o |
| NIN_HUMAN    | NIN      | Ninein                                                                       | o |
| NIT2_HUMAN   | NIT2     | Omega-amidase NIT2                                                           | o |
| NMT1_HUMAN   | NMT1     | Glycylpeptide N-tetradecanoyltransferase 1                                   | o |
| NNMT_HUMAN   | NNMT     | Nicotinamide N-methyltransferase                                             | o |
| NOG1_HUMAN   | GTPBP4   | Nucleolar GTP-binding protein 1                                              | o |
| NOL6_HUMAN   | NOL6     | Nucleolar protein 6                                                          | o |
| NOP56_HUMAN  | NOP56    | Nucleolar protein 56                                                         | o |
| NOP58_HUMAN  | NOP58    | Nucleolar protein 58                                                         | o |
| NOP9_HUMAN   | NOP9     | Nucleolar protein 9                                                          | o |
| NP1L4_HUMAN  | NAP1L4   | Nucleosome assembly protein 1-like 4                                         | o |
| NPC2_HUMAN   | NPC2     | Epididymal secretory protein E1                                              | o |
| NPL4_HUMAN   | NPLOC4   | Nuclear protein localization protein 4 homolog                               | o |
| NQO1_HUMAN   | NQO1     | NAD(P)H dehydrogenase [quinone] 1                                            | o |
| NRBP_HUMAN   | NRBP1    | Nuclear receptor-binding protein                                             | o |
| NRDC_HUMAN   | NRDC     | Nardilysin                                                                   | o |
| NRIP1_HUMAN  | NRIP1    | Nuclear receptor-interacting protein 1                                       | o |

|             |          |                                                                         |   |
|-------------|----------|-------------------------------------------------------------------------|---|
| NSDHL_HUMAN | NSDHL    | Sterol-4-alpha-carboxylate 3-dehydrogenase, decarboxylating             | o |
| NT5D2_HUMAN | NT5DC2   | 5'-nucleotidase domain-containing protein 2                             | o |
| NTF2_HUMAN  | NTF2     | Nuclear transport factor 2                                              | o |
| NTM1A_HUMAN | NTMT1    | N-terminal Xaa-Pro-Lys N-methyltransferase 1                            | o |
| NU133_HUMAN | NUP133   | Nuclear pore complex protein Nup133                                     | o |
| NU155_HUMAN | NUP155   | Nuclear pore complex protein Nup155                                     | o |
| NU188_HUMAN | NUP188   | Nucleoporin NUP188 homolog                                              | o |
| NU214_HUMAN | NUP214   | Nuclear pore complex protein Nup214                                     | o |
| NUCB2_HUMAN | NUCB2    | Nucleobindin-2                                                          | o |
| NUCKS_HUMAN | NUCKS1   | Nuclear ubiquitous casein and cyclin-dependent kinase substrate 1       | o |
| NUDC_HUMAN  | NUDC     | Nuclear migration protein nudC                                          | o |
| NUP37_HUMAN | NUP37    | Nucleoporin Nup37                                                       | o |
| NUP50_HUMAN | NUP50    | Nuclear pore complex protein Nup50                                      | o |
| NUP53_HUMAN | NUP35    | Nucleoporin NUP53                                                       | o |
| NVL_HUMAN   | NVL      | Nuclear valosin-containing protein-like                                 | o |
| NXF1_HUMAN  | NXF1     | Nuclear RNA export factor 1                                             | o |
| NXN_HUMAN   | NXN      | Nucleoredoxin                                                           | o |
| OAS1_HUMAN  | OAS1     | 2'-5'-oligoadenylate synthase 1                                         | o |
| OAS2_HUMAN  | OAS2     | 2'-5'-oligoadenylate synthase 2                                         | o |
| OAS3_HUMAN  | OAS3     | 2'-5'-oligoadenylate synthase 3                                         | o |
| OASL_HUMAN  | OASL     | 2'-5'-oligoadenylate synthase-like protein                              | o |
| OAT_HUMAN   | OAT      | Ornithine aminotransferase, mitochondrial                               | o |
| OCAD2_HUMAN | OCAD2    | OCIA domain-containing protein 2                                        | o |
| OFUT1_HUMAN | POFUT1   | GDP-fucose protein O-fucosyltransferase 1                               | o |
| OGA_HUMAN   | MGEA5    | Protein O-GlcNAcase                                                     | o |
| OGFR_HUMAN  | OGFR     | Opioid growth factor receptor                                           | o |
| OLA1_HUMAN  | OLA1     | Obg-like ATPase 1                                                       | o |
| OPA1_HUMAN  | OPA1     | Dynamin-like 120 kDa protein, mitochondrial                             | o |
| OPTN_HUMAN  | OPTN     | Optineurin                                                              | o |
| OTUB1_HUMAN | OTUB1    | Ubiquitin thioesterase OTUB1                                            | o |
| OVCH1_HUMAN | OVCH1    | Ovochymase-1                                                            | o |
| OXS1_HUMAN  | OXS1     | Serine/threonine-protein kinase OSR1                                    | o |
| P4K2A_HUMAN | PI4K2A   | Phosphatidylinositol 4-kinase type 2-alpha                              | o |
| P5CR2_HUMAN | PYCR2    | Proline-5-carboxylate reductase 2                                       | o |
| PABP2_HUMAN | PABPN1   | Polyadenylate-binding protein 2                                         | o |
| PAIRB_HUMAN | SERBP1   | Plasminogen activator inhibitor 1 RNA-binding protein                   | o |
| PAK2_HUMAN  | PAK2     | Serine/threonine-protein kinase PAK 2                                   | o |
| PAPD1_HUMAN | MTPAP    | Poly(A) RNA polymerase, mitochondrial                                   | o |
| PAR10_HUMAN | PARP10   | Poly [ADP-ribose] polymerase 10                                         | o |
| PAR14_HUMAN | PARP14   | Poly [ADP-ribose] polymerase 14                                         | o |
| PARP9_HUMAN | PARP9    | Poly [ADP-ribose] polymerase 9                                          | o |
| PAWR_HUMAN  | PAWR     | PRKC apoptosis WT1 regulator protein                                    | o |
| PAXI_HUMAN  | PXN      | Paxillin                                                                | o |
| PBDC1_HUMAN | PBDC1    | Protein PBDC1                                                           | o |
| PCAT1_HUMAN | LPCAT1   | Lysophosphatidylcholine acyltransferase 1                               | o |
| PCDG4_HUMAN | PCDHGA4  | Protocadherin gamma-A4                                                  | o |
| PCNA_HUMAN  | PCNA     | Proliferating cell nuclear antigen                                      | o |
| PCNP_HUMAN  | PCNP     | PEST proteolytic signal-containing nuclear protein                      | o |
| PCY1A_HUMAN | PCYT1A   | Choline-phosphate cytidyltransferase A                                  | o |
| PDCD4_HUMAN | PDCD4    | Programmed cell death protein 4                                         | o |
| PDCD5_HUMAN | PDCD5    | Programmed cell death protein 5                                         | o |
| PDIP3_HUMAN | POLDIP3  | Polymerase delta-interacting protein 3                                  | o |
| PDLI4_HUMAN | PDLIM4   | PDZ and LIM domain protein 4                                            | o |
| PDLI7_HUMAN | PDLIM7   | PDZ and LIM domain protein 7                                            | o |
| PDS5A_HUMAN | PDS5A    | Sister chromatid cohesion protein PDS5 homolog A                        | o |
| PDXK_HUMAN  | PDXK     | Pyridoxal kinase                                                        | o |
| PDZD2_HUMAN | PDZD2    | PDZ domain-containing protein 2                                         | o |
| PEA15_HUMAN | PEA15    | Astrocytic phosphoprotein PEA-15                                        | o |
| PEBP1_HUMAN | PEBP1    | Phosphatidylethanolamine-binding protein 1                              | o |
| PELO_HUMAN  | PELO     | Protein pelota homolog                                                  | o |
| PELP1_HUMAN | PELP1    | Proline-, glutamic acid- and leucine-rich protein 1                     | o |
| PEPD_HUMAN  | PEPD     | Xaa-Pro dipeptidase                                                     | o |
| PERQ2_HUMAN | GIGYF2   | PERQ amino acid-rich with GYF domain-containing protein 2               | o |
| PFD1_HUMAN  | PFDN1    | Prefoldin subunit 1                                                     | o |
| PFD2_HUMAN  | PFDN2    | Prefoldin subunit 2                                                     | o |
| PFD4_HUMAN  | PFDN4    | Prefoldin subunit 4                                                     | o |
| PFD6_HUMAN  | PFDN6    | Prefoldin subunit 6                                                     | o |
| PFKAL_HUMAN | PFKL     | ATP-dependent 6-phosphofructokinase, liver type                         | o |
| PGM1_HUMAN  | PGM1     | Phosphoglucomutase-1                                                    | o |
| PGM2_HUMAN  | PGM2     | Phosphoglucomutase-2                                                    | o |
| PGP_HUMAN   | PGP      | Phosphoglycolate phosphatase                                            | o |
| PHAX_HUMAN  | PHAX     | Phosphorylated adapter RNA export protein                               | o |
| PHF5A_HUMAN | PHF5A    | PHD finger-like domain-containing protein 5A                            | o |
| PI42A_HUMAN | PIP4K2A  | Phosphatidylinositol 5-phosphate 4-kinase type-2 alpha                  | o |
| PICAL_HUMAN | PICALM   | Phosphatidylinositol-binding clathrin assembly protein                  | o |
| PIGS_HUMAN  | PIGS     | GPI transamidase component PIG-S                                        | o |
| PIN1_HUMAN  | PIN1     | Peptidyl-prolyl cis-trans isomerase NIMA-interacting 1                  | o |
| PININ_HUMAN | PNN      | Pinin                                                                   | o |
| PKHD1_HUMAN | PKHD1    | Fibrocystin                                                             | o |
| PLAK_HUMAN  | JUP      | Junction plakoglobin                                                    | o |
| PLCG1_HUMAN | PLCG1    | 1-phosphatidylinositol 4,5-bisphosphate phosphodiesterase gamma-1       | o |
| PLIN3_HUMAN | PLIN3    | Perilipin-3                                                             | o |
| PLPP_HUMAN  | PDXP     | Pyridoxal phosphate phosphatase                                         | o |
| PLRG1_HUMAN | PLRG1    | Pleiotropic regulator 1                                                 | o |
| PLSL_HUMAN  | LCP1     | Plastin-2                                                               | o |
| PLST_HUMAN  | PLS3     | Plastin-3                                                               | o |
| PMVK_HUMAN  | PMVK     | Phosphomevalonate kinase                                                | o |
| PNCB_HUMAN  | NAPRT    | Nicotinate phosphoribosyltransferase                                    | o |
| PNPH_HUMAN  | PNP      | Purine nucleoside phosphorylase                                         | o |
| POP1_HUMAN  | POP1     | Ribonucleases P/MRP protein subunit POP1                                | o |
| PP14B_HUMAN | PPP1R14B | Protein phosphatase 1 regulatory subunit 14B                            | o |
| PP2AA_HUMAN | PPP2CA   | Serine/threonine-protein phosphatase 2A catalytic subunit alpha isoform | o |
| PP2BA_HUMAN | PPP3CA   | Serine/threonine-protein phosphatase 2B catalytic subunit alpha isoform | o |
| PPAC_HUMAN  | ACP1     | Low molecular weight phosphotyrosine protein phosphatase                | o |

|             |           |                                                                               |   |
|-------------|-----------|-------------------------------------------------------------------------------|---|
| PPIG_HUMAN  | PPIG      | Peptidyl-prolyl cis-trans isomerase G                                         | o |
| PPIL1_HUMAN | PPIL1     | Peptidyl-prolyl cis-trans isomerase-like 1                                    | o |
| PPM1G_HUMAN | PPM1G     | Protein phosphatase 1G                                                        | o |
| PPM1H_HUMAN | PPM1H     | Protein phosphatase 1H                                                        | o |
| PPME1_HUMAN | PPME1     | Protein phosphatase methylesterase 1                                          | o |
| PPP5_HUMAN  | PPP5C     | Serine/threonine-protein phosphatase 5                                        | o |
| PPP6_HUMAN  | PPP6C     | Serine/threonine-protein phosphatase 6 catalytic subunit                      | o |
| PPR18_HUMAN | PPP1R18   | Phostensin                                                                    | o |
| PQBP1_HUMAN | PQBP1     | Polyglutamine-binding protein 1                                               | o |
| PR38A_HUMAN | PRPF38A   | Pre-mRNA-splicing factor 38A                                                  | o |
| PR40A_HUMAN | PRPF40A   | Pre-mRNA-processing factor 40 homolog A                                       | o |
| PRDX3_HUMAN | PRDX3     | Thioredoxin-dependent peroxide reductase, mitochondrial                       | o |
| PRDX5_HUMAN | PRDX5     | Peroxiredoxin-5, mitochondrial                                                | o |
| PRKRA_HUMAN | PRKRA     | Interferon-inducible double-stranded RNA-dependent protein kinase activator A | o |
| PROF2_HUMAN | PFN2      | Profilin-2                                                                    | o |
| PROSC_HUMAN | PROSC     | Proline synthase co-transcribed bacterial homolog protein                     | o |
| PRP19_HUMAN | PRPF19    | Pre-mRNA-processing factor 19                                                 | o |
| PRP4_HUMAN  | PRPF4     | U4/U6 small nuclear ribonucleoprotein Prp4                                    | o |
| PRP6_HUMAN  | PRPF6     | Pre-mRNA-processing factor 6                                                  | o |
| PRRC1_HUMAN | PRRC1     | Protein PRRC1                                                                 | o |
| PSA_HUMAN   | NPEPPS    | Puromycin-sensitive aminopeptidase                                            | o |
| PSA1_HUMAN  | PSMA1     | Proteasome subunit alpha type-1                                               | o |
| PSA3_HUMAN  | PSMA3     | Proteasome subunit alpha type-3                                               | o |
| PSB1_HUMAN  | PSMB1     | Proteasome subunit beta type-1                                                | o |
| PSB10_HUMAN | PSMB10    | Proteasome subunit beta type-10                                               | o |
| PSB2_HUMAN  | PSMB2     | Proteasome subunit beta type-2                                                | o |
| PSB3_HUMAN  | PSMB3     | Proteasome subunit beta type-3                                                | o |
| PSB4_HUMAN  | PSMB4     | Proteasome subunit beta type-4                                                | o |
| PSB5_HUMAN  | PSMB5     | Proteasome subunit beta type-5                                                | o |
| PSB8_HUMAN  | PSMB8     | Proteasome subunit beta type-8                                                | o |
| PSB9_HUMAN  | PSMB9     | Proteasome subunit beta type-9                                                | o |
| PSD13_HUMAN | PSMD13    | 26S proteasome non-ATPase regulatory subunit 13                               | o |
| PSIP1_HUMAN | PSIP1     | PC4 and SFRS1-interacting protein                                             | o |
| PSMD5_HUMAN | PSMD5     | 26S proteasome non-ATPase regulatory subunit 5                                | o |
| PSME1_HUMAN | PSME1     | Proteasome activator complex subunit 1                                        | o |
| PSME2_HUMAN | PSME2     | Proteasome activator complex subunit 2                                        | o |
| PSME3_HUMAN | PSME3     | Proteasome activator complex subunit 3                                        | o |
| PSMG2_HUMAN | PSMG2     | Proteasome assembly chaperone 2                                               | o |
| PTGR1_HUMAN | PTGR1     | Prostaglandin reductase 1                                                     | o |
| PTH2_HUMAN  | PTRH2     | Peptidyl-tRNA hydrolase 2, mitochondrial                                      | o |
| PTN11_HUMAN | PTPN11    | Tyrosine-protein phosphatase non-receptor type 11                             | o |
| PTN23_HUMAN | PTPN23    | Tyrosine-protein phosphatase non-receptor type 23                             | o |
| PTPA_HUMAN  | PPP2R4    | Serine/threonine-protein phosphatase 2A activator                             | o |
| PUF60_HUMAN | PUF60     | Poly(U)-binding-splicing factor PUF60                                         | o |
| PUR1_HUMAN  | PPAT      | Amidophosphoribosyltransferase                                                | o |
| PUR8_HUMAN  | ADSL      | Adenylosuccinate lyase                                                        | o |
| PWP1_HUMAN  | PWP1      | Periodic tryptophan protein 1 homolog                                         | o |
| PWP2_HUMAN  | PWP2      | Periodic tryptophan protein 2 homolog                                         | o |
| PYGB_HUMAN  | PYGB      | Glycogen phosphorylase, brain form                                            | o |
| PYGL_HUMAN  | PYGL      | Glycogen phosphorylase, liver form                                            | o |
| PYRG1_HUMAN | CTPS1     | CTP synthase 1                                                                | o |
| QOR_HUMAN   | CRYZ      | Quinone oxidoreductase                                                        | o |
| QTRD1_HUMAN | QTRT1     | Queuine tRNA-ribosyltransferase subunit QTRT1                                 | o |
| RAB1B_HUMAN | RAB1B     | Ras-related protein Rab-1B                                                    | o |
| RAB6A_HUMAN | RAB6A     | Ras-related protein Rab-6A                                                    | o |
| RAD21_HUMAN | RAD21     | Double-strand-break repair protein rad21 homolog                              | o |
| RAD50_HUMAN | RAD50     | DNA repair protein RAD50                                                      | o |
| RADI_HUMAN  | RDX       | Radixin                                                                       | o |
| RANG_HUMAN  | RANBP1    | Ran-specific GTPase-activating protein                                        | o |
| RAP1B_HUMAN | RAP1B     | Ras-related protein Rap-1b                                                    | o |
| RAPH1_HUMAN | RAPH1     | Ras-associated and pleckstrin homology domains-containing protein 1           | o |
| RASH_HUMAN  | HRAS      | GTPase HRas                                                                   | o |
| RAVR1_HUMAN | RAVER1    | Ribonucleoprotein PTB-binding 1                                               | o |
| RB6I2_HUMAN | ERC1      | ELKS/Rab6-interacting/CAST family member 1                                    | o |
| RBBP4_HUMAN | RBBP4     | Histone-binding protein RBBP4                                                 | o |
| RBBP7_HUMAN | RBBP7     | Histone-binding protein RBBP7                                                 | o |
| RBGPR_HUMAN | RAB3GAP2  | Rab3 GTPase-activating protein non-catalytic subunit                          | o |
| RBM10_HUMAN | RBM10     | RNA-binding protein 10                                                        | o |
| RBM12_HUMAN | RBM12     | RNA-binding protein 12                                                        | o |
| RBM15_HUMAN | RBM15     | Putative RNA-binding protein 15                                               | o |
| RBM3_HUMAN  | RBM3      | RNA-binding protein 3                                                         | o |
| RBM4_HUMAN  | RBM4      | RNA-binding protein 4                                                         | o |
| RBMX_HUMAN  | RBMX      | RNA-binding motif protein, X chromosome                                       | o |
| RBP2_HUMAN  | RANBP2    | E3 SUMO-protein ligase RanBP2                                                 | o |
| RBP56_HUMAN | TAF15     | TATA-binding protein-associated factor 2N                                     | o |
| RCC1_HUMAN  | RCC1      | Regulator of chromosome condensation                                          | o |
| RCN2_HUMAN  | RCN2      | Reticulocalbin-2                                                              | o |
| RD23B_HUMAN | RAD23B    | UV excision repair protein RAD23 homolog B                                    | o |
| RDH11_HUMAN | RDH11     | Retinol dehydrogenase 11                                                      | o |
| RECQ1_HUMAN | RECQL     | ATP-dependent DNA helicase Q1                                                 | o |
| RED_HUMAN   | IK        | Protein Red                                                                   | o |
| RFA2_HUMAN  | RPA2      | Replication protein A 32 kDa subunit                                          | o |
| RFA3_HUMAN  | RPA3      | Replication protein A 14 kDa subunit                                          | o |
| RFC1_HUMAN  | RFC1      | Replication factor C subunit 1                                                | o |
| RFC3_HUMAN  | RFC3      | Replication factor C subunit 3                                                | o |
| RFC4_HUMAN  | RFC4      | Replication factor C subunit 4                                                | o |
| RFIP5_HUMAN | RAB11FIP5 | Rab11 family-interacting protein 5                                            | o |
| RHG01_HUMAN | ARHGAP1   | Rho GTPase-activating protein 1                                               | o |
| RHG18_HUMAN | ARHGAP18  | Rho GTPase-activating protein 18                                              | o |
| RHG30_HUMAN | ARHGAP30  | Rho GTPase-activating protein 30                                              | o |
| RIC8A_HUMAN | RIC8A     | Synembryn-A                                                                   | o |
| RIPK2_HUMAN | RIPK2     | Receptor-interacting serine/threonine-protein kinase 2                        | o |
| RIR2_HUMAN  | RRM2      | Ribonucleoside-diphosphate reductase subunit M2                               | o |
| RL1D1_HUMAN | RSL1D1    | Ribosomal L1 domain-containing protein 1                                      | o |

|              |          |                                                                                               |   |
|--------------|----------|-----------------------------------------------------------------------------------------------|---|
| RL35_HUMAN   | RPL35    | 60S ribosomal protein L35                                                                     | o |
| RM01_HUMAN   | MRPL1    | 39S ribosomal protein L1, mitochondrial                                                       | o |
| RM04_HUMAN   | MRPL4    | 39S ribosomal protein L4, mitochondrial                                                       | o |
| RM11_HUMAN   | MRPL11   | 39S ribosomal protein L11, mitochondrial                                                      | o |
| RM12_HUMAN   | MRPL12   | 39S ribosomal protein L12, mitochondrial                                                      | o |
| RM19_HUMAN   | MRPL19   | 39S ribosomal protein L19, mitochondrial                                                      | o |
| RM37_HUMAN   | MRPL37   | 39S ribosomal protein L37, mitochondrial                                                      | o |
| RM47_HUMAN   | MRPL47   | 39S ribosomal protein L47, mitochondrial                                                      | o |
| RN22_HUMAN   | ELAC2    | Zinc phosphodiesterase ELAC protein 2                                                         | o |
| ROS2_HUMAN   | TRIM21   | E3 ubiquitin-protein ligase TRIM21                                                            | o |
| RO60_HUMAN   | TROVE2   | 60 kDa SS-A/Ro ribonucleoprotein                                                              | o |
| ROA0_HUMAN   | HNRNPA0  | Heterogeneous nuclear ribonucleoprotein A0                                                    | o |
| ROA3_HUMAN   | HNRNPA3  | Heterogeneous nuclear ribonucleoprotein A3                                                    | o |
| ROAA_HUMAN   | HNRNPAB  | Heterogeneous nuclear ribonucleoprotein A/B                                                   | o |
| RPAC1_HUMAN  | POLR1C   | DNA-directed RNA polymerases I and III subunit RPAC1                                          | o |
| RPB1_HUMAN   | POLR2A   | DNA-directed RNA polymerase II subunit RPB1                                                   | o |
| RPB2_HUMAN   | POLR2B   | DNA-directed RNA polymerase II subunit RPB2                                                   | o |
| RPC3_HUMAN   | POLR3C   | DNA-directed RNA polymerase III subunit RPC3                                                  | o |
| RPE_HUMAN    | RPE      | Ribulose-phosphate 3-epimerase                                                                | o |
| RPP30_HUMAN  | RPP30    | Ribonuclease P protein subunit p30                                                            | o |
| RPR1B_HUMAN  | RPRD1B   | Regulation of nuclear pre-mRNA domain-containing protein 1B                                   | o |
| RRBP1_HUMAN  | RRBP1    | Ribosome-binding protein 1                                                                    | o |
| RRP1B_HUMAN  | RRP1B    | Ribosomal RNA processing protein 1 homolog B                                                  | o |
| RRP44_HUMAN  | DIS3     | Exosome complex exonuclease RRP44                                                             | o |
| RRP5_HUMAN   | PDCD11   | Protein RRP5 homolog                                                                          | o |
| RS15_HUMAN   | RPS15    | 40S ribosomal protein S15                                                                     | o |
| RS25_HUMAN   | RPS25    | 40S ribosomal protein S25                                                                     | o |
| RSF1_HUMAN   | RSF1     | Remodeling and spacing factor 1                                                               | o |
| RSMB_HUMAN   | SNRPB    | Small nuclear ribonucleoprotein-associated proteins B and B'                                  | o |
| RSU1_HUMAN   | RSU1     | Ras suppressor protein 1                                                                      | o |
| RT18B_HUMAN  | MRPS18B  | 28S ribosomal protein S18b, mitochondrial                                                     | o |
| RTCA_HUMAN   | RTCA     | RNA 3'-terminal phosphate cyclase                                                             | o |
| RU17_HUMAN   | SNRNP70  | U1 small nuclear ribonucleoprotein 70 kDa                                                     | o |
| RU2A_HUMAN   | SNRPA1   | U2 small nuclear ribonucleoprotein A'                                                         | o |
| RUXE_HUMAN   | SNRPE    | Small nuclear ribonucleoprotein E                                                             | o |
| S10A6_HUMAN  | S100A6   | Protein S100-A6                                                                               | o |
| S10AA_HUMAN  | S100A10  | Protein S100-A10                                                                              | o |
| S10AB_HUMAN  | S100A11  | Protein S100-A11                                                                              | o |
| S10AD_HUMAN  | S100A13  | Protein S100-A13                                                                              | o |
| S23IP_HUMAN  | SEC23IP  | SEC23-interacting protein                                                                     | o |
| SAE2_HUMAN   | UBA2     | SUMO-activating enzyme subunit 2                                                              | o |
| SAFB1_HUMAN  | SAFB     | Scaffold attachment factor B1                                                                 | o |
| SAHH_HUMAN   | AHCY     | Adenosylhomocysteinase                                                                        | o |
| SAR1A_HUMAN  | SAR1A    | GTP-binding protein SAR1a                                                                     | o |
| SARNP_HUMAN  | SARNP    | SAP domain-containing ribonucleoprotein                                                       | o |
| SC23B_HUMAN  | SEC23B   | Protein transport protein Sec23B                                                              | o |
| SC24C_HUMAN  | SEC24C   | Protein transport protein Sec24C                                                              | o |
| SCAFB_HUMAN  | SCAF11   | Protein SCAF11                                                                                | o |
| SCFD1_HUMAN  | SCFD1    | Sec1 family domain-containing protein 1                                                       | o |
| SCMC1_HUMAN  | SCL25A24 | Calcium-binding mitochondrial carrier protein ScaMC-1                                         | o |
| SCOT1_HUMAN  | OXC1T    | Succinyl-CoA:3-ketoacid coenzyme A transferase 1, mitochondrial                               | o |
| SEC13_HUMAN  | SEC13    | Protein SEC13 homolog                                                                         | o |
| SEPT11_HUMAN | SEPT11   | Septin-11                                                                                     | o |
| SEPT8_HUMAN  | SEPT8    | Septin-8                                                                                      | o |
| SET_HUMAN    | SET      | Protein SET                                                                                   | o |
| SF01_HUMAN   | SF1      | Splicing factor 1                                                                             | o |
| SF3A1_HUMAN  | SF3A1    | Splicing factor 3A subunit 1                                                                  | o |
| SF3A3_HUMAN  | SF3A3    | Splicing factor 3A subunit 3                                                                  | o |
| SF3B1_HUMAN  | SF3B1    | Splicing factor 3B subunit 1                                                                  | o |
| SF3B2_HUMAN  | SF3B2    | Splicing factor 3B subunit 2                                                                  | o |
| SF3B4_HUMAN  | SF3B4    | Splicing factor 3B subunit 4                                                                  | o |
| SF3B6_HUMAN  | SF3B6    | Splicing factor 3B subunit 6                                                                  | o |
| SH3L1_HUMAN  | SH3BGR1  | SH3 domain-binding glutamic acid-rich-like protein                                            | o |
| SH3GLB1      | SH3GLB1  | Endophilin-B1                                                                                 | o |
| SIA5_HUMAN   | NANS     | Sialic acid synthase                                                                          | o |
| SK2L2_HUMAN  | SKIV2L2  | Superkiller viralicidic activity 2-like 2                                                     | o |
| SKP1_HUMAN   | SKP1     | S-phase kinase-associated protein 1                                                           | o |
| SLFN5_HUMAN  | SLFN5    | Schlafen family member 5                                                                      | o |
| SLK_HUMAN    | SLK      | STE20-like serine/threonine-protein kinase                                                    | o |
| SMBT2_HUMAN  | SFMBT2   | Scm-like with four MBT domains protein 2                                                      | o |
| SMC3_HUMAN   | SMC3     | Structural maintenance of chromosomes protein 3                                               | o |
| SMCA4_HUMAN  | SMARCA4  | Transcription activator BRG1                                                                  | o |
| SMCE1_HUMAN  | SMARCE1  | SWI/SNF-related matrix-associated actin-dependent regulator of chromatin subfamily E member 1 | o |
| SMD1_HUMAN   | SNRPD1   | Small nuclear ribonucleoprotein Sm D1                                                         | o |
| SMHD1_HUMAN  | SMCHD1   | Structural maintenance of chromosomes flexible hinge domain-containing protein 1              | o |
| SMRC2_HUMAN  | SMARCC2  | SWI/SNF complex subunit SMARCC2                                                               | o |
| SMU1_HUMAN   | SMU1     | WD40 repeat-containing protein SMU1                                                           | o |
| SNA4_HUMAN   | NAPA     | Alpha-soluble NSF attachment protein                                                          | o |
| SNP29_HUMAN  | SNAP29   | Synaptosomal-associated protein 29                                                            | o |
| SNUT1_HUMAN  | SART1    | U4/U6.U5 tri-snRNP-associated protein 1                                                       | o |
| SNW1_HUMAN   | SNW1     | SNW domain-containing protein 1                                                               | o |
| SNX1_HUMAN   | SNX1     | Sorting nexin-1                                                                               | o |
| SNX12_HUMAN  | SNX12    | Sorting nexin-12                                                                              | o |
| SNX9_HUMAN   | SNX9     | Sorting nexin-9                                                                               | o |
| SODC_HUMAN   | SOD1     | Superoxide dismutase [Cu-Zn]                                                                  | o |
| SORCN_HUMAN  | SRI      | Sorcin                                                                                        | o |
| SP100_HUMAN  | SP100    | Nuclear autoantigen Sp-100                                                                    | o |
| SPB1_HUMAN   | FTSJ3    | pre-rRNA processing protein FTSJ3                                                             | o |
| SPB6_HUMAN   | SERPINB6 | Serpin B6                                                                                     | o |
| SPG20_HUMAN  | SPG20    | Spartin                                                                                       | o |
| SPS2L_HUMAN  | SPATS2L  | SPATS2-like protein                                                                           | o |
| SPT2_HUMAN   | SPTY2D1  | Protein SPT2 homolog                                                                          | o |
| SPT6H_HUMAN  | SUPT6H   | Transcription elongation factor SPT6                                                          | o |

|               |          |                                                                   |   |
|---------------|----------|-------------------------------------------------------------------|---|
| SPTN4_HUMAN   | SPTN4    | Spectrin beta chain, non-erythrocytic 4                           | o |
| SRP72_HUMAN   | SRP72    | Signal recognition particle subunit SRP72                         | o |
| SRRT_HUMAN    | SRRT     | Serrate RNA effector molecule homolog                             | o |
| SRSF2_HUMAN   | SRSF2    | Serine/arginine-rich splicing factor 2                            | o |
| SRSF4_HUMAN   | SRSF4    | Serine/arginine-rich splicing factor 4                            | o |
| SRSF5_HUMAN   | SRSF5    | Serine/arginine-rich splicing factor 5                            | o |
| ST1A1_HUMAN   | SULT1A1  | Sulfotransferase 1A1                                              | o |
| ST1A3_HUMAN   | SULT1A3  | Sulfotransferase 1A3                                              | o |
| ST1E1_HUMAN   | SULT1E1  | Estrogen sulfotransferase                                         | o |
| STAR9_HUMAN   | STAR9    | STAR-related lipid transfer protein 9                             | o |
| STAT2_HUMAN   | STAT2    | Signal transducer and activator of transcription 2                | o |
| STAT3_HUMAN   | STAT3    | Signal transducer and activator of transcription 3                | o |
| STAT6_HUMAN   | STAT6    | Signal transducer and activator of transcription 6                | o |
| STAU1_HUMAN   | STAU1    | Double-stranded RNA-binding protein Staufen homolog 1             | o |
| STIM1_HUMAN   | STIM1    | Stromal interaction molecule 1                                    | o |
| STK10_HUMAN   | STK10    | Serine/threonine-protein kinase 10                                | o |
| STK24_HUMAN   | STK24    | Serine/threonine-protein kinase 24                                | o |
| STRAP_HUMAN   | STRAP    | Serine-threonine kinase receptor-associated protein               | o |
| STRUM_HUMAN   | KIAA0196 | WASH complex subunit strumpellin                                  | o |
| STX5_HUMAN    | STX5     | Syntaxin-5                                                        | o |
| SUMF2_HUMAN   | SUMF2    | Sulfatase-modifying factor 2                                      | o |
| SUMO1_HUMAN   | SUMO1    | Small ubiquitin-related modifier 1                                | o |
| SUMO2_HUMAN   | SUMO2    | Small ubiquitin-related modifier 2                                | o |
| SUN1_HUMAN    | SUN1     | SUN domain-containing protein 1                                   | o |
| SWP70_HUMAN   | SWAP70   | Switch-associated protein 70                                      | o |
| SYAP1_HUMAN   | SYAP1    | Synapse-associated protein 1                                      | o |
| SYDM_HUMAN    | DARS2    | Aspartate--tRNA ligase, mitochondrial                             | o |
| SYHC_HUMAN    | HARS     | Histidine--tRNA ligase, cytoplasmic                               | o |
| SYJ2B_HUMAN   | SYNJ2BP  | Synaptojanin-2-binding protein                                    | o |
| SYLC_HUMAN    | LARS     | Leucine--tRNA ligase, cytoplasmic                                 | o |
| SYNE1_HUMAN   | SYNE1    | Nesprin-1                                                         | o |
| SYQ_HUMAN     | QARS     | Glutamine--tRNA ligase                                            | o |
| SYUG_HUMAN    | SNCG     | Gamma-synuclein                                                   | o |
| SYWC_HUMAN    | WARS     | Tryptophan--tRNA ligase, cytoplasmic                              | o |
| SYYC_HUMAN    | YARS     | Tyrosine--tRNA ligase, cytoplasmic                                | o |
| T2EA_HUMAN    | GT2E1    | General transcription factor IIE subunit 1                        | o |
| TAB1_HUMAN    | TAB1     | TGF-beta-activated kinase 1 and MAP3K7-binding protein 1          | o |
| TACC3_HUMAN   | TACC3    | Transforming acidic coiled-coil-containing protein 3              | o |
| TAGL_HUMAN    | TAGLN    | Transgelin                                                        | o |
| TAP1_HUMAN    | TAP1     | Antigen peptide transporter 1                                     | o |
| TAP2_HUMAN    | TAP2     | Antigen peptide transporter 2                                     | o |
| TB182_HUMAN   | TNKS1BP1 | 182 kDa tankyrase-1-binding protein                               | o |
| TBB3_HUMAN    | TUBB3    | Tubulin beta-3 chain                                              | o |
| TBC15_HUMAN   | TBC1D15  | TBC1 domain family member 15                                      | o |
| TBCB_HUMAN    | TBCB     | Tubulin-folding cofactor B                                        | o |
| TCAL3_HUMAN   | TCEAL3   | Transcription elongation factor A protein-like 3                  | o |
| TCEA1_HUMAN   | TCEA1    | Transcription elongation factor A protein 1                       | o |
| TCOF_HUMAN    | TCOF1    | Treacle protein                                                   | o |
| TCRG1_HUMAN   | TCERG1   | Transcription elongation regulator 1                              | o |
| TE2IP_HUMAN   | TERF2IP  | Telomeric repeat-binding factor 2-interacting protein 1           | o |
| TENS3_HUMAN   | TNS3     | Tensin-3                                                          | o |
| TFAM_HUMAN    | TFAM     | Transcription factor A, mitochondrial                             | o |
| THIC_HUMAN    | ACAT2    | Acetyl-CoA acetyltransferase, cytosolic                           | o |
| THIM_HUMAN    | ACAA2    | 3-ketoacyl-CoA thiolase, mitochondrial                            | o |
| THOC4_HUMAN   | ALYREF   | THO complex subunit 4                                             | o |
| THOP1_HUMAN   | THOP1    | Thimet oligopeptidase                                             | o |
| THTM_HUMAN    | MPST     | 3-mercaptopyruvate sulfurtransferase                              | o |
| TIF1B_HUMAN   | TRIM28   | Transcription intermediary factor 1-beta                          | o |
| TIGAR_HUMAN   | TIGAR    | Fructose-2,6-bisphosphatase TIGAR                                 | o |
| TIM13_HUMAN   | TIMM13   | Mitochondrial import inner membrane translocase subunit Tim13     | o |
| TIM9_HUMAN    | TIMM9    | Mitochondrial import inner membrane translocase subunit Tim9      | o |
| TIPRL_HUMAN   | TIPRL    | TIP41-like protein                                                | o |
| TLN2_HUMAN    | TLN2     | Talin-2                                                           | o |
| TM214_HUMAN   | TMEM214  | Transmembrane protein 214                                         | o |
| TMX2_HUMAN    | TMX2     | Thioredoxin-related transmembrane protein 2                       | o |
| TNKS1_HUMAN   | TNKS     | Tankyrase-1                                                       | o |
| TNPO1_HUMAN   | TNPO1    | Transportin-1                                                     | o |
| TOIP1_HUMAN   | TOR1AIP1 | Torsin-1A-interacting protein 1                                   | o |
| TOM1_HUMAN    | TOM1     | Target of Myb protein 1                                           | o |
| TOM34_HUMAN   | TOMM34   | Mitochondrial import receptor subunit TOM34                       | o |
| TOM70_HUMAN   | TOMM70   | Mitochondrial import receptor subunit TOM70                       | o |
| TOP2B_HUMAN   | TOP2B    | DNA topoisomerase 2-beta                                          | o |
| TP53BP1_HUMAN | TP53BP1  | Tumor suppressor p53-binding protein 1                            | o |
| TPD52L2_HUMAN | TPD52L2  | Tumor protein D54                                                 | o |
| TPPC3_HUMAN   | TRAPPC3  | Trafficking protein particle complex subunit 3                    | o |
| TR112_HUMAN   | TRMT112  | Multifunctional methyltransferase subunit TRM112-like protein     | o |
| TRA2A_HUMAN   | TRA2A    | Transformer-2 protein homolog alpha                               | o |
| TRI25_HUMAN   | TRIM25   | E3 ubiquitin/ISG15 ligase TRIM25                                  | o |
| TRI56_HUMAN   | TRIM56   | E3 ubiquitin-protein ligase TRIM56                                | o |
| TRIO_HUMAN    | TRIO     | Triple functional domain protein                                  | o |
| TRIP6_HUMAN   | TRIP6    | Thyroid receptor-interacting protein 6                            | o |
| TRIPC_HUMAN   | TRIP12   | E3 ubiquitin-protein ligase TRIP12                                | o |
| TRM7_HUMAN    | FTSJ1    | Putative tRNA (cytidine(32)/guanosine(34)-2'-O)-methyltransferase | o |
| TSN_HUMAN     | TSN      | Translin                                                          | o |
| TTC37_HUMAN   | TTC37    | Tetratricopeptide repeat protein 37                               | o |
| TWF1_HUMAN    | TWF1     | Twinfilin-1                                                       | o |
| TWF2_HUMAN    | TWF2     | Twinfilin-2                                                       | o |
| TXD17_HUMAN   | TXNDC17  | Thioredoxin domain-containing protein 17                          | o |
| TXLNA_HUMAN   | TXLNA    | Alpha-taxilin                                                     | o |
| TXNL1_HUMAN   | TXNL1    | Thioredoxin-like protein 1                                        | o |
| TXTP_HUMAN    | SLC25A1  | Tricarboxylate transport protein, mitochondrial                   | o |
| TYB10_HUMAN   | TMSB10   | Thymosin beta-10                                                  | o |
| TYB4_HUMAN    | TMSB4X   | Thymosin beta-4                                                   | o |
| TYPH_HUMAN    | TYMP     | Thymidine phosphorylase                                           | o |

|              |          |                                                                     |   |   |   |
|--------------|----------|---------------------------------------------------------------------|---|---|---|
| U2AF1_HUMAN  | U2AF1    | Splicing factor U2AF 35 kDa subunit                                 | o |   |   |
| UB2L3_HUMAN  | UBE2L3   | Ubiquitin-conjugating enzyme E2 L3                                  | o |   |   |
| UB2L6_HUMAN  | UBE2L6   | Ubiquitin/ISG15-conjugating enzyme E2 L6                            | o |   |   |
| UBA3_HUMAN   | UBA3     | NEDD8-activating enzyme E1 catalytic subunit                        | o |   |   |
| UBA6_HUMAN   | UBA6     | Ubiquitin-like modifier-activating enzyme 6                         | o |   |   |
| UBA7_HUMAN   | UBA7     | Ubiquitin-like modifier-activating enzyme 7                         | o |   |   |
| UBC12_HUMAN  | UBE2M    | NEDD8-conjugating enzyme Ubc12                                      | o |   |   |
| UBC9_HUMAN   | UBE2I    | SUMO-conjugating enzyme UBC9                                        | o |   |   |
| UBCP1_HUMAN  | UBLCP1   | Ubiquitin-like domain-containing CTD phosphatase 1                  | o |   |   |
| UBE2A_HUMAN  | UBE2A    | Ubiquitin-conjugating enzyme E2 A                                   | o |   |   |
| UBE2K_HUMAN  | UBE2K    | Ubiquitin-conjugating enzyme E2 K                                   | o |   |   |
| UBE2N_HUMAN  | UBE2N    | Ubiquitin-conjugating enzyme E2 N                                   | o |   |   |
| UBF1_HUMAN   | UBTF     | Nucleolar transcription factor 1                                    | o |   |   |
| UBP14_HUMAN  | USP14    | Ubiquitin carboxyl-terminal hydrolase 14                            | o |   |   |
| UBP18_HUMAN  | USP18    | Ubl carboxyl-terminal hydrolase 18                                  | o |   |   |
| UBP19_HUMAN  | USP19    | Ubiquitin carboxyl-terminal hydrolase 19                            | o |   |   |
| UBP2L_HUMAN  | UBAP2L   | Ubiquitin-associated protein 2-like                                 | o |   |   |
| UBP7_HUMAN   | USP7     | Ubiquitin carboxyl-terminal hydrolase 7                             | o |   |   |
| UBQL2_HUMAN  | UBQLN2   | Ubiquilin-2                                                         | o |   |   |
| UBR4_HUMAN   | UBR4     | E3 ubiquitin-protein ligase UBR4                                    | o |   |   |
| UBS3B_HUMAN  | UBASH3B  | Ubiquitin-associated and SH3 domain-containing protein B            | o |   |   |
| UCHL3_HUMAN  | UCHL3    | Ubiquitin carboxyl-terminal hydrolase isozyme L3                    | o |   |   |
| UFC1_HUMAN   | UFC1     | Ubiquitin-fold modifier-conjugating enzyme 1                        | o |   |   |
| UFD1_HUMAN   | UFD1L    | Ubiquitin fusion degradation protein 1 homolog                      | o |   |   |
| UFM1_HUMAN   | UFM1     | Ubiquitin-fold modifier 1                                           | o |   |   |
| UGPA_HUMAN   | UGP2     | UTP-glucose-1-phosphate uridylyltransferase                         | o |   |   |
| UHRF2_HUMAN  | UHRF2    | E3 ubiquitin-protein ligase UHRF2                                   | o |   |   |
| UN45A_HUMAN  | UNC45A   | Protein unc-45 homolog A                                            | o |   |   |
| USO1_HUMAN   | USO1     | General vesicular transport factor p115                             | o |   |   |
| USP9X_HUMAN  | USP9X    | Probable ubiquitin carboxyl-terminal hydrolase FAF-X                | o |   |   |
| UTRO_HUMAN   | UTRN     | Utrrophin                                                           | o |   |   |
| VATC1_HUMAN  | ATP6V1C1 | V-type proton ATPase subunit C 1                                    | o |   |   |
| VDAC3_HUMAN  | VDAC3    | Voltage-dependent anion-selective channel protein 3                 | o |   |   |
| VPP3_HUMAN   | TCIRG1   | V-type proton ATPase 116 kDa subunit a isoform 3                    | o |   |   |
| VPS11_HUMAN  | VPS11    | Vacuolar protein sorting-associated protein 11 homolog              | o |   |   |
| VPS29_HUMAN  | VPS29    | Vacuolar protein sorting-associated protein 29                      | o |   |   |
| VPS41_HUMAN  | VPS41    | Vacuolar protein sorting-associated protein 41 homolog              | o |   |   |
| VPS45_HUMAN  | VPS45    | Vacuolar protein sorting-associated protein 45                      | o |   |   |
| VTA1_HUMAN   | VTA1     | Vacuolar protein sorting-associated protein VTA1 homolog            | o |   |   |
| WDHD1_HUMAN  | WDHD1    | WD repeat and HMG-box DNA-binding protein 1                         | o |   |   |
| WDR36_HUMAN  | WDR36    | WD repeat-containing protein 36                                     | o |   |   |
| WDR46_HUMAN  | WDR46    | WD repeat-containing protein 46                                     | o |   |   |
| WDR5_HUMAN   | WDR5     | WD repeat-containing protein 5                                      | o |   |   |
| WDR82_HUMAN  | WDR82    | WD repeat-containing protein 82                                     | o |   |   |
| XPO1_HUMAN   | XPO1     | Exportin-1                                                          | o |   |   |
| XPO5_HUMAN   | XPO5     | Exportin-5                                                          | o |   |   |
| XPP1_HUMAN   | XPNPEP1  | Xaa-Pro aminopeptidase 1                                            | o |   |   |
| XRN2_HUMAN   | XRN2     | 5'-3' exoribonuclease 2                                             | o |   |   |
| YAP1_HUMAN   | YAP1     | Transcriptional coactivator YAP1                                    | o |   |   |
| YBOX3_HUMAN  | YBX3     | Y-box-binding protein 3                                             | o |   |   |
| YLPM1_HUMAN  | YLPM1    | YLP motif-containing protein 1                                      | o |   |   |
| YTHD2_HUMAN  | YTHDF2   | YTH domain-containing family protein 2                              | o |   |   |
| ZC11A_HUMAN  | ZC3H11A  | Zinc finger CCCH domain-containing protein 11A                      | o |   |   |
| ZC3H4_HUMAN  | ZC3H4    | Zinc finger CCCH domain-containing protein 4                        | o |   |   |
| ZC3HF_HUMAN  | ZC3H15   | Zinc finger CCCH domain-containing protein 15                       | o |   |   |
| ZFR_HUMAN    | ZFR      | Zinc finger RNA-binding protein                                     | o |   |   |
| ZHANG_HUMAN  | CREBZF   | CREB/ATF bZIP transcription factor                                  | o |   |   |
| ZMY15_HUMAN  | ZMYND15  | Zinc finger MYND domain-containing protein 15                       | o |   |   |
| ZN326_HUMAN  | ZNF326   | DBIRD complex subunit ZNF326                                        | o |   |   |
| ZN428_HUMAN  | ZNF428   | Zinc finger protein 428                                             | o |   |   |
| ZN512_HUMAN  | ZNF512   | Zinc finger protein 512                                             | o |   |   |
| ZN878_HUMAN  | ZNF878   | Zinc finger protein 878                                             | o |   |   |
| ZNT7_HUMAN   | SLC30A7  | Zinc transporter 7                                                  | o |   |   |
| ZRAB2_HUMAN  | ZRANB2   | Zinc finger Ran-binding domain-containing protein 2                 | o |   |   |
| ZW10_HUMAN   | ZW10     | Centromere/kinetochore protein zw10 homolog                         | o |   |   |
| CD2A2_HUMAN  | CDKN2A   | Cyclin-dependent kinase inhibitor 2A, isoform 4                     | o |   |   |
| FBX18_HUMAN  | FBXO18   | F-box only protein 18                                               | o |   |   |
| NALP3_HUMAN  | NLRP3    | NACHT, LRR and PYD domains-containing protein 3                     | o |   |   |
| SRPR_HUMAN   | SRPRA    | Signal recognition particle receptor subunit alpha                  | o |   |   |
| SUGT1_HUMAN  | SUGT1    | Suppressor of G2 allele of SKP1 homolog                             | o |   |   |
| TENC1_HUMAN  | TNS2     | Tensin-like C1 domain-containing phosphatase                        | o |   |   |
| WIBG_HUMAN   | PYM1     | Partner of Y14 and mago                                             | o |   |   |
| AAAT_HUMAN   | SLC1A5   | Neutral amino acid transporter B(0)                                 | o | o | o |
| ACTBL_HUMAN  | ACTBL2   | Beta-actin-like protein 2                                           | o | o | o |
| ADAM9_HUMAN  | ADAM9    | Disintegrin and metalloproteinase domain-containing protein 9       | o | o | o |
| ALBU_HUMAN   | ALB      | Serum albumin                                                       | o | o | o |
| APOM_HUMAN   | APOM     | Apolipoprotein M                                                    | o | o | o |
| ATP1B1_HUMAN | ATP1B1   | Sodium/potassium-transporting ATPase subunit beta-1                 | o | o | o |
| AT2B4_HUMAN  | ATP2B4   | Plasma membrane calcium-transporting ATPase 4                       | o | o | o |
| CO3_HUMAN    | C3       | Complement C3                                                       | o | o | o |
| CSPG4_HUMAN  | CSPG4    | Chondroitin sulfate proteoglycan 4                                  | o | o | o |
| CTGF_HUMAN   | CTGF     | Connective tissue growth factor                                     | o | o | o |
| CYR61_HUMAN  | CYR61    | Protein CYR61                                                       | o | o | o |
| DLG1_HUMAN   | DLG1     | Disks large homolog 1                                               | o | o | o |
| FETUA_HUMAN  | AHSG     | Alpha-2-HS-glycoprotein                                             | o | o | o |
| GAPR1_HUMAN  | GLPR2    | Golgi-associated plant pathogenesis-related protein 1               | o | o | o |
| GBB4_HUMAN   | GNB4     | Guanine nucleotide-binding protein subunit beta-4                   | o | o | o |
| GNA11_HUMAN  | GNA11    | Guanine nucleotide-binding protein subunit alpha-11                 | o | o | o |
| GNAS1_HUMAN  | GNAS     | Guanine nucleotide-binding protein G(s) subunit alpha isoforms XLas | o | o | o |
| GTR1_HUMAN   | SLC2A1   | Solute carrier family 2, facilitated glucose transporter member 1   | o | o | o |
| HBA_HUMAN    | HBA1     | Hemoglobin subunit alpha                                            | o | o | o |
| HBE_HUMAN    | HBE1     | Hemoglobin subunit epsilon                                          | o | o | o |
| HP1B3_HUMAN  | HP1BP3   | Heterochromatin protein 1-binding protein 3                         | o | o | o |
| IFM1_HUMAN   | IFITM1   | Interferon-induced transmembrane protein 1                          | o | o | o |

|              |          |                                                                             |   |   |
|--------------|----------|-----------------------------------------------------------------------------|---|---|
| ITA6_HUMAN   | ITGA6    | Integrin alpha-6                                                            | 0 | 0 |
| ITAV_HUMAN   | ITGAV    | Integrin alpha-V                                                            | 0 | 0 |
| JAK1_HUMAN   | JAK1     | Tyrosine-protein kinase JAK1                                                | 0 | 0 |
| MFGM_HUMAN   | MFGE8    | Lactadherin                                                                 | 0 | 0 |
| NPTN_HUMAN   | NPTN     | Neuroplastin                                                                | 0 | 0 |
| NRP1_HUMAN   | NRP1     | Neuropilin-1                                                                | 0 | 0 |
| PABP1_HUMAN  | PABPC1   | Polyadenylate-binding protein 1                                             | 0 | 0 |
| PAI1_HUMAN   | SERPINE1 | Plasminogen activator inhibitor 1                                           | 0 | 0 |
| PECA1_HUMAN  | PECAM1   | Platelet endothelial cell adhesion molecule                                 | 0 | 0 |
| PESC_HUMAN   | PES1     | Pescadillo homolog                                                          | 0 | 0 |
| PLXA2_HUMAN  | PLXNA2   | Plexin-A2                                                                   | 0 | 0 |
| PLXB2_HUMAN  | PLXNB2   | Plexin-B2                                                                   | 0 | 0 |
| RAC2_HUMAN   | RAC2     | Ras-related C3 botulinum toxin substrate 2                                  | 0 | 0 |
| RHOC_HUMAN   | RHOC     | Rho-related GTP-binding protein RhoC                                        | 0 | 0 |
| RRAS_HUMAN   | RRAS     | Ras-related protein R-Ras                                                   | 0 | 0 |
| RS29_HUMAN   | RPS29    | 40S ribosomal protein S29                                                   | 0 | 0 |
| SCRB1_HUMAN  | SCARB1   | Scavenger receptor class B member 1                                         | 0 | 0 |
| SH3B4_HUMAN  | SH3BP4   | SH3 domain-binding protein 4                                                | 0 | 0 |
| SPTLC1_HUMAN | SPTLC1   | Serine palmitoyltransferase 1                                               | 0 | 0 |
| SRSF11_HUMAN | SRSF11   | Serine/arginine-rich splicing factor 11                                     | 0 | 0 |
| TACD2_HUMAN  | TACSTD2  | Tumor-associated calcium signal transducer 2                                | 0 | 0 |
| TFPI1_HUMAN  | TFPI     | Tissue factor pathway inhibitor                                             | 0 | 0 |
| TGFR2_HUMAN  | TGFR2    | TGF-beta receptor type-2                                                    | 0 | 0 |
| THRB_HUMAN   | F2       | Prothrombin                                                                 | 0 | 0 |
| TPA_HUMAN    | PLAT     | Tissue-type plasminogen activator                                           | 0 | 0 |
| TSP1_HUMAN   | THBS1    | Thrombospondin-1                                                            | 0 | 0 |
| UFO_HUMAN    | AXL      | Tyrosine-protein kinase receptor UFO                                        | 0 | 0 |
| UPAR_HUMAN   | PLAUR    | Urokinase plasminogen activator surface receptor                            | 0 | 0 |
| VTNC_HUMAN   | VTN      | Vitronectin                                                                 | 0 | 0 |
| XRP2_HUMAN   | RP2      | Protein XRP2                                                                | 0 | 0 |
| YES_HUMAN    | YES1     | Tyrosine-protein kinase Yes                                                 | 0 | 0 |
| A4_HUMAN     | APP      | Amyloid beta A4 protein                                                     | 0 | 0 |
| ABCF2_HUMAN  | ABCF2    | ATP-binding cassette sub-family F member 2                                  | 0 | 0 |
| ACOT9_HUMAN  | ACOT9    | Acyl-coenzyme A thioesterase 9, mitochondrial                               | 0 | 0 |
| AP3D1_HUMAN  | AP3D1    | AP-3 complex subunit delta-1                                                | 0 | 0 |
| ARHG1_HUMAN  | ARHGEF1  | Rho guanine nucleotide exchange factor 1                                    | 0 | 0 |
| AT1B3_HUMAN  | ATP1B3   | Sodium/potassium-transporting ATPase subunit beta-3                         | 0 | 0 |
| ATPD_HUMAN   | ATPSD    | ATP synthase subunit delta, mitochondrial                                   | 0 | 0 |
| C1TM_HUMAN   | MTHFD1L  | Monofunctional C1-tetrahydrofolate synthase, mitochondrial                  | 0 | 0 |
| CA2D1_HUMAN  | CACNA2D1 | Voltage-dependent calcium channel subunit alpha-2/delta-1                   | 0 | 0 |
| CAV1_HUMAN   | CAV1     | Caveolin-1                                                                  | 0 | 0 |
| CD320_HUMAN  | CD320    | CD320 antigen                                                               | 0 | 0 |
| CD47_HUMAN   | CD47     | Leukocyte surface antigen CD47                                              | 0 | 0 |
| CERS2_HUMAN  | CERS2    | Ceramide synthase 2                                                         | 0 | 0 |
| COX6C_HUMAN  | COX6C    | Cytochrome c oxidase subunit 6C                                             | 0 | 0 |
| CRTAP_HUMAN  | CRTAP    | Cartilage-associated protein                                                | 0 | 0 |
| CSK22_HUMAN  | CSNK2A2  | Casein kinase II subunit alpha'                                             | 0 | 0 |
| CSK12_HUMAN  | CASKIN2  | Caskin-2                                                                    | 0 | 0 |
| CTRO_HUMAN   | CIT      | Citron Rho-interacting kinase                                               | 0 | 0 |
| CYTC_HUMAN   | CST3     | Cystatin-C                                                                  | 0 | 0 |
| DAF_HUMAN    | CD55     | Complement decay-accelerating factor                                        | 0 | 0 |
| DJC13_HUMAN  | DNAJC13  | DnaJ homolog subfamily C member 13                                          | 0 | 0 |
| DNJA2_HUMAN  | DNJA2    | DnaJ homolog subfamily A member 2                                           | 0 | 0 |
| DX39A_HUMAN  | DDX39A   | ATP-dependent RNA helicase DDX39A                                           | 0 | 0 |
| ENDD1_HUMAN  | ENDOD1   | Endonuclease domain-containing 1 protein                                    | 0 | 0 |
| EPIPL_HUMAN  | EPPK1    | Epiplakin                                                                   | 0 | 0 |
| ERAP2_HUMAN  | ERAP2    | Endoplasmic reticulum aminopeptidase 2                                      | 0 | 0 |
| ESYT2_HUMAN  | ESYT2    | Extended synaptotagmin-2                                                    | 0 | 0 |
| FKBP2_HUMAN  | FKBP2    | Peptidyl-prolyl cis-trans isomerase FKBP2                                   | 0 | 0 |
| FKBP9_HUMAN  | FKBP9    | Peptidyl-prolyl cis-trans isomerase FKBP9                                   | 0 | 0 |
| FYV1_HUMAN   | PIKFYVE  | 1-phosphatidylinositol 3-phosphate 5-kinase                                 | 0 | 0 |
| G3PT_HUMAN   | GAPDH5   | Glyceraldehyde-3-phosphate dehydrogenase, testis-specific                   | 0 | 0 |
| GBG12_HUMAN  | GNG12    | Guanine nucleotide-binding protein G(i)/G(s)/G(o) subunit gamma-12          | 0 | 0 |
| GLIP1_HUMAN  | GLIPR1   | Glioma pathogenesis-related protein 1                                       | 0 | 0 |
| GNA13_HUMAN  | GNA13    | Guanine nucleotide-binding protein subunit alpha-13                         | 0 | 0 |
| GPAA1_HUMAN  | GPAA1    | Glycosylphosphatidylinositol anchor attachment 1 protein                    | 0 | 0 |
| GPI8_HUMAN   | PIGK     | GPI-anchor transamidase                                                     | 0 | 0 |
| GSHB_HUMAN   | GSS      | Glutathione synthetase                                                      | 0 | 0 |
| GSTK1_HUMAN  | GSTK1    | Glutathione S-transferase kappa 1                                           | 0 | 0 |
| H12_HUMAN    | HIST1H1C | Histone H1.2                                                                | 0 | 0 |
| H31T_HUMAN   | HIST3H3  | Histone H3.1t                                                               | 0 | 0 |
| HDAC1_HUMAN  | HDAC1    | Histone deacetylase 1                                                       | 0 | 0 |
| ITPR3_HUMAN  | ITPR3    | Inositol 1,4,5-trisphosphate receptor type 3                                | 0 | 0 |
| JAM1_HUMAN   | F11R     | Junctional adhesion molecule A                                              | 0 | 0 |
| KGUA_HUMAN   | GUK1     | Guanylate kinase                                                            | 0 | 0 |
| KIF23_HUMAN  | KIF23    | Kinesin-like protein KIF23                                                  | 0 | 0 |
| KIF4A_HUMAN  | KIF4A    | Chromosome-associated kinesin KIF4A                                         | 0 | 0 |
| KLC1_HUMAN   | KLC1     | Kinesin light chain 1                                                       | 0 | 0 |
| KPCA_HUMAN   | PRKCA    | Protein kinase C alpha type                                                 | 0 | 0 |
| LBR_HUMAN    | LBR      | Lamin-B receptor                                                            | 0 | 0 |
| LCAP_HUMAN   | LNPEP    | Leucyl-cystinyl aminopeptidase                                              | 0 | 0 |
| LRC8A_HUMAN  | LRRCA8A  | Volume-regulated anion channel subunit LRRCA8A                              | 0 | 0 |
| MCCB_HUMAN   | MCCC2    | Methylcrotonoyl-CoA carboxylase beta chain, mitochondrial                   | 0 | 0 |
| MLEC_HUMAN   | MLEC     | Malectin                                                                    | 0 | 0 |
| MMP14_HUMAN  | MMP14    | Matrix metalloproteinase-14                                                 | 0 | 0 |
| MOGS_HUMAN   | MOGS     | Mannosyl-oligosaccharide glucosidase                                        | 0 | 0 |
| MPPA_HUMAN   | PMPCA    | Mitochondrial-processing peptidase subunit alpha                            | 0 | 0 |
| MRP1_HUMAN   | ABCC1    | Multidrug resistance-associated protein 1                                   | 0 | 0 |
| NDUA2_HUMAN  | NDUFA2   | NADH dehydrogenase [ubiquinone] 1 alpha subcomplex subunit 2                | 0 | 0 |
| NDUA9_HUMAN  | NDUFA9   | NADH dehydrogenase [ubiquinone] 1 alpha subcomplex subunit 9, mitochondrial | 0 | 0 |
| NDUAD_HUMAN  | NDUFA13  | NADH dehydrogenase [ubiquinone] 1 alpha subcomplex subunit 13               | 0 | 0 |
| NDUB4_HUMAN  | NDUFB4   | NADH dehydrogenase [ubiquinone] 1 beta subcomplex subunit 4                 | 0 | 0 |
| NDUB5_HUMAN  | NDUFB5   | NADH dehydrogenase [ubiquinone] 1 beta subcomplex subunit 5, mitochondrial  | 0 | 0 |
| NDUB8_HUMAN  | NDUFB8   | NADH dehydrogenase [ubiquinone] 1 beta subcomplex subunit 8, mitochondrial  | 0 | 0 |



|             |          |                                                                             |   |
|-------------|----------|-----------------------------------------------------------------------------|---|
| NDUS2_HUMAN | NDUFS2   | NADH dehydrogenase [ubiquinone] iron-sulfur protein 2, mitochondrial        | o |
| NFS1_HUMAN  | NFS1     | Cysteine desulfurase, mitochondrial                                         | o |
| NHRF2_HUMAN | SLC9A3R2 | Na(+)/H(+) exchange regulatory cofactor NHE-RF2                             | o |
| NIPS1_HUMAN | NIPSNAP1 | Protein NipSnap homolog 1                                                   | o |
| NNTM_HUMAN  | NNT      | NAD(P) transhydrogenase, mitochondrial                                      | o |
| NOMO1_HUMAN | NOMO1    | Nodal modulator 1                                                           | o |
| NUCB1_HUMAN | NUCB1    | Nucleobindin-1                                                              | o |
| NUP88_HUMAN | NUP88    | Nuclear pore complex protein Nup88                                          | o |
| P3H1_HUMAN  | P3H1     | Prolyl 3-hydroxylase 1                                                      | o |
| PALLD_HUMAN | PALLD    | Palladin                                                                    | o |
| PD1L1_HUMAN | CD274    | Programmed cell death 1 ligand 1                                            | o |
| PIPNA_HUMAN | PITPNA   | Phosphatidylinositol transfer protein alpha isoform                         | o |
| PLP2_HUMAN  | PLP2     | Proteolipid protein 2                                                       | o |
| PP1R7_HUMAN | PPP1R7   | Protein phosphatase 1 regulatory subunit 7                                  | o |
| PP2AB_HUMAN | PPP2CB   | Serine/threonine-protein phosphatase 2A catalytic subunit beta isoform      | o |
| PR40B_HUMAN | PRPF40B  | Pre-mRNA-processing factor 40 homolog B                                     | o |
| PRC1_HUMAN  | PRC1     | Protein regulator of cytokinesis 1                                          | o |
| PRC2C_HUMAN | PRRC2C   | Protein PRRC2C                                                              | o |
| PREB_HUMAN  | PREB     | Prolactin regulatory element-binding protein                                | o |
| QCR6_HUMAN  | UQCRH    | Cytochrome b-c1 complex subunit 6, mitochondrial                            | o |
| RAB10_HUMAN | RAB10    | Ras-related protein Rab-10                                                  | o |
| RAB13_HUMAN | RAB13    | Ras-related protein Rab-13                                                  | o |
| RAP2C_HUMAN | RAP2C    | Ras-related protein Rap-2c                                                  | o |
| RASL3_HUMAN | RASAL3   | RAS protein activator like-3                                                | o |
| RASN_HUMAN  | NRAS     | GTPase NRas                                                                 | o |
| RDH14_HUMAN | RDH14    | Retinol dehydrogenase 14                                                    | o |
| RL26_HUMAN  | RPL26    | 60S ribosomal protein L26                                                   | o |
| RLAOL_HUMAN | RPLPOP6  | 60S acidic ribosomal protein P0-like                                        | o |
| RM13_HUMAN  | MRPL13   | 39S ribosomal protein L13, mitochondrial                                    | o |
| RM21_HUMAN  | MRPL21   | 39S ribosomal protein L21, mitochondrial                                    | o |
| RM45_HUMAN  | MRPL45   | 39S ribosomal protein L45, mitochondrial                                    | o |
| RMXL1_HUMAN | RBMXL1   | RNA binding motif protein, X-linked-like-1                                  | o |
| RS27L_HUMAN | RPS27L   | 40S ribosomal protein S27-like                                              | o |
| RSMN_HUMAN  | SNRPN    | Small nuclear ribonucleoprotein-associated protein N                        | o |
| RT22_HUMAN  | MRP522   | 28S ribosomal protein S22, mitochondrial                                    | o |
| RT28_HUMAN  | MRP528   | 28S ribosomal protein S28, mitochondrial                                    | o |
| RT36_HUMAN  | MRP536   | 28S ribosomal protein S36, mitochondrial                                    | o |
| RUXGL_HUMAN | SNRPGP15 | Putative small nuclear ribonucleoprotein G-like protein 15                  | o |
| RYR1_HUMAN  | RYR1     | Ryanodine receptor 1                                                        | o |
| S27A4_HUMAN | SLC27A4  | Long-chain fatty acid transport protein 4                                   | o |
| SAR1B_HUMAN | SAR1B    | GTP-binding protein SAR1b                                                   | o |
| SC11B_HUMAN | SEC11B   | Putative signal peptidase complex catalytic subunit SEC11B                  | o |
| SCAM2_HUMAN | SCAMP2   | Secretory carrier-associated membrane protein 2                             | o |
| SCAM4_HUMAN | SCAMP4   | Secretory carrier-associated membrane protein 4                             | o |
| SCO1_HUMAN  | SCO1     | Protein SCO1 homolog, mitochondrial                                         | o |
| SCRIB_HUMAN | SCRIB    | Protein scribble homolog                                                    | o |
| SGTA_HUMAN  | SGTA     | Small glutamine-rich tetratricopeptide repeat-containing protein alpha      | o |
| SH23A_HUMAN | SH2D3A   | SH2 domain-containing protein 3A                                            | o |
| SLN11_HUMAN | SLFN11   | Schlafen family member 11                                                   | o |
| SMAD9_HUMAN | SMAD9    | Mothers against decapentaplegic homolog 9                                   | o |
| SMN_HUMAN   | SMN1     | Survival motor neuron protein                                               | o |
| SPCS2_HUMAN | SPCS2    | Signal peptidase complex subunit 2                                          | o |
| SPTCS_HUMAN | SPG11    | Spatacin                                                                    | o |
| SSRG_HUMAN  | SSR3     | Translocon-associated protein subunit gamma                                 | o |
| STT3A_HUMAN | STT3A    | Dolichyl-diphosphooligosaccharide-protein glycosyltransferase subunit STT3A | o |
| STT3B_HUMAN | STT3B    | Dolichyl-diphosphooligosaccharide-protein glycosyltransferase subunit STT3B | o |
| STX8_HUMAN  | STX8     | Syntaxin-8                                                                  | o |
| SUCA_HUMAN  | SUCLG1   | Succinyl-CoA ligase [ADP/GDP-forming] subunit alpha, mitochondrial          | o |
| SYFA_HUMAN  | FARSA    | Phenylalanine-tRNA ligase alpha subunit                                     | o |
| SYPL1_HUMAN | SYPL1    | Synaptophysin-like protein 1                                                | o |
| TARA_HUMAN  | TRIOBP   | TRIO and F-actin-binding protein                                            | o |
| TBG1_HUMAN  | TUBG1    | Tubulin gamma-1 chain                                                       | o |
| TBL3_HUMAN  | TBL3     | Transducin beta-like protein 3                                              | o |
| THEM6_HUMAN | THEM6    | Protein THEM6                                                               | o |
| TIM16_HUMAN | PAM16    | Mitochondrial import inner membrane translocase subunit TIM16               | o |
| TMED9_HUMAN | TMED9    | Transmembrane emp24 domain-containing protein 9                             | o |
| TMM33_HUMAN | TMEM33   | Transmembrane protein 33                                                    | o |
| TOM22_HUMAN | TOMM22   | Mitochondrial import receptor subunit TOM22 homolog                         | o |
| TOR1B_HUMAN | TOR1B    | Torsin-1B                                                                   | o |
| UBQL4_HUMAN | UBQLN4   | Ubiquilin-4                                                                 | o |
| VATB2_HUMAN | ATP6V1B2 | V-type proton ATPase subunit B, brain isoform                               | o |
| VPP1_HUMAN  | ATP6V0A1 | V-type proton ATPase 116 kDa subunit a isoform 1                            | o |
| ABI1_HUMAN  | ABI1     | Abl interactor 1                                                            | o |
| ADA10_HUMAN | ADAM10   | Disintegrin and metalloproteinase domain-containing protein 10              | o |
| ADA15_HUMAN | ADAM15   | Disintegrin and metalloproteinase domain-containing protein 15              | o |
| ADA17_HUMAN | ADAM17   | Disintegrin and metalloproteinase domain-containing protein 17              | o |
| AGRIN_HUMAN | AGRN     | Agrin                                                                       | o |
| AMY2B_HUMAN | AMY2B    | Alpha-amylase 2B                                                            | o |
| ANO6_HUMAN  | ANO6     | Anoctamin-6                                                                 | o |
| ARRD1_HUMAN | ARRDC1   | Arrestin domain-containing protein 1                                        | o |
| AT2B3_HUMAN | ATP2B3   | Plasma membrane calcium-transporting ATPase 3                               | o |
| AT2C1_HUMAN | ATP2C1   | Calcium-transporting ATPase type 2C member 1                                | o |
| AT8B1_HUMAN | ATP8B1   | Phospholipid-transporting ATPase IC                                         | o |
| B3A2_HUMAN  | SLC4A2   | Anion exchange protein 2                                                    | o |
| B4GA1_HUMAN | B4GAT1   | Beta-1,4-glucuronyltransferase 1                                            | o |
| BAIP2_HUMAN | BAIAP2   | Brain-specific angiogenesis inhibitor 1-associated protein 2                | o |
| BST1_HUMAN  | BST1     | ADP-ribosyl cyclase/cyclic ADP-ribose hydrolase 2                           | o |
| CAC1E_HUMAN | CACNA1E  | Voltage-dependent R-type calcium channel subunit alpha-1E                   | o |
| CADH2_HUMAN | CDH2     | Cadherin-2                                                                  | o |
| CD151_HUMAN | CD151    | CD151 antigen                                                               | o |
| CD276_HUMAN | CD276    | CD276 antigen                                                               | o |
| CDCP1_HUMAN | CDCP1    | CUB domain-containing protein 1                                             | o |
| CHM2A_HUMAN | CHMP2A   | Charged multivesicular body protein 2a                                      | o |
| CJ076_HUMAN | C10orf76 | UPF0668 protein C10orf76                                                    | o |

|              |           |                                                                      |   |
|--------------|-----------|----------------------------------------------------------------------|---|
| CLC11_HUMAN  | CLEC11A   | C-type lectin domain family 11 member A                              | o |
| CLC14_HUMAN  | CLEC14A   | C-type lectin domain family 14 member A                              | o |
| CLD12_HUMAN  | CLDN12    | Claudin-12                                                           | o |
| COL1A1_HUMAN | COL1A1    | Collagen alpha-1(I) chain                                            | o |
| COL1A2_HUMAN | COL1A2    | Collagen alpha-2(I) chain                                            | o |
| COL4A2_HUMAN | COL4A2    | Collagen alpha-2(IV) chain                                           | o |
| COL5A1_HUMAN | COL5A1    | Collagen alpha-1(V) chain                                            | o |
| COL6A1_HUMAN | COL6A1    | Collagen alpha-1(VI) chain                                           | o |
| CO8B_HUMAN   | C8B       | Complement component C8 beta chain                                   | o |
| CO9_HUMAN    | C9        | Complement component C9                                              | o |
| COBA2_HUMAN  | COL11A2   | Collagen alpha-2(XI) chain                                           | o |
| COIA1_HUMAN  | COL18A1   | Collagen alpha-1(XVIII) chain                                        | o |
| COR1A_HUMAN  | CORO1A    | Coronin-1A                                                           | o |
| CRIM1_HUMAN  | CRIM1     | Cysteine-rich motor neuron 1 protein                                 | o |
| CSK23_HUMAN  | CSNK2A3   | Casein kinase II subunit alpha 3                                     | o |
| CTL1_HUMAN   | SLC44A1   | Choline transporter-like protein 1                                   | o |
| CTL2_HUMAN   | SLC44A2   | Choline transporter-like protein 2                                   | o |
| CTR1_HUMAN   | SLC7A1    | High affinity cationic amino acid transporter 1                      | o |
| CXA1_HUMAN   | GJA1      | Gap junction alpha-1 protein                                         | o |
| DCBD2_HUMAN  | DCBLD2    | Discoidin, CUB and LCLL domain-containing protein 2                  | o |
| DIP2B_HUMAN  | DIP2B     | Disco-interacting protein 2 homolog B                                | o |
| DMBT1_HUMAN  | DMBT1     | Deleted in malignant brain tumors 1 protein                          | o |
| DPP4_HUMAN   | DPP4      | Dipeptidyl peptidase 4                                               | o |
| EGFR_HUMAN   | EGFR      | Epidermal growth factor receptor                                     | o |
| EPHB2_HUMAN  | EPHB2     | Ephrin type-B receptor 2                                             | o |
| EVA1A_HUMAN  | EVA1A     | Protein eva-1 homolog A                                              | o |
| EVA1B_HUMAN  | EVA1B     | Protein eva-1 homolog B                                              | o |
| FA5_HUMAN    | F5        | Coagulation factor V                                                 | o |
| FARP1_HUMAN  | FARP1     | FERM, RhoGEF and pleckstrin domain-containing protein 1              | o |
| FBLN1_HUMAN  | FBLN1     | Fibulin-1                                                            | o |
| FGF2_HUMAN   | FGF2      | Fibroblast growth factor 2                                           | o |
| FIBB_HUMAN   | FGB       | Fibrinogen beta chain                                                | o |
| FMNL3_HUMAN  | FMNL3     | Formin-like protein 3                                                | o |
| FYN_HUMAN    | FYN       | Tyrosine-protein kinase Fyn                                          | o |
| FZD6_HUMAN   | FZD6      | Frizzled-6                                                           | o |
| GGT5_HUMAN   | GGT5      | Gamma-glutamyltransferase 5                                          | o |
| GIPC1_HUMAN  | GIPC1     | PDZ domain-containing protein GIPC1                                  | o |
| GP126_HUMAN  | GPR126    | G-protein coupled receptor 126                                       | o |
| GPC1_HUMAN   | GPC1      | Glypican-1                                                           | o |
| H2A1B_HUMAN  | HIST1H2AB | Histone H2A type 1-B/E                                               | o |
| H31_HUMAN    | HIST1H3A  | Histone H3.1                                                         | o |
| HABP2_HUMAN  | HABP2     | Hyaluronan-binding protein 2                                         | o |
| HHIP_HUMAN   | HHIP      | Hedgehog-interacting protein                                         | o |
| HTRA1_HUMAN  | HTRA1     | Serine protease HTRA1                                                | o |
| IGSF8_HUMAN  | IGSF8     | Immunoglobulin superfamily member 8                                  | o |
| IL4RA_HUMAN  | IL4R      | Interleukin-4 receptor subunit alpha                                 | o |
| IL6RB_HUMAN  | IL6ST     | Interleukin-6 receptor subunit beta                                  | o |
| IST1_HUMAN   | IST1      | IST1 homolog                                                         | o |
| ITB3_HUMAN   | ITGB3     | Integrin beta-3                                                      | o |
| ITB4_HUMAN   | ITGB4     | Integrin beta-4                                                      | o |
| ITIH1_HUMAN  | ITIH1     | Inter-alpha-trypsin inhibitor heavy chain H1                         | o |
| ITIH2_HUMAN  | ITIH2     | Inter-alpha-trypsin inhibitor heavy chain H2                         | o |
| ITIH3_HUMAN  | ITIH3     | Inter-alpha-trypsin inhibitor heavy chain H3                         | o |
| K2C5_HUMAN   | KRT5      | Keratin, type II cytoskeletal 5                                      | o |
| KIF5C_HUMAN  | KIF5C     | Kinesin heavy chain isoform 5C                                       | o |
| KIRREL_HUMAN | KIRREL    | Kin of IRRE-like protein 1                                           | o |
| KT3K_HUMAN   | FN3KRP    | Ketosamine-3-kinase                                                  | o |
| LAP4A_HUMAN  | LAPTM4A   | Lysosomal-associated transmembrane protein 4A                        | o |
| LUC7L2_HUMAN | LUC7L2    | Putative RNA-binding protein Luc7-like 2                             | o |
| LHPL2_HUMAN  | LHPL2     | Lipoma HMGIC fusion partner-like 2 protein                           | o |
| LRP1_HUMAN   | LRP1      | Prolow-density lipoprotein receptor-related protein 1                | o |
| M4K4_HUMAN   | MAP4K4    | Mitogen-activated protein kinase kinase kinase kinase 4              | o |
| MASP1_HUMAN  | MASP1     | Mannan-binding lectin serine protease 1                              | o |
| MB12A_HUMAN  | MVB12A    | Multivesicular body subunit 12A                                      | o |
| MCP_HUMAN    | CD46      | Membrane cofactor protein                                            | o |
| MIME_HUMAN   | OGN       | Mimecan                                                              | o |
| MINK1_HUMAN  | MINK1     | Misshapen-like kinase 1                                              | o |
| MOT1_HUMAN   | SLC16A1   | Monocarboxylate transporter 1                                        | o |
| MPZL1_HUMAN  | MPZL1     | Myelin protein zero-like protein 1                                   | o |
| MPZL2_HUMAN  | MPZL2     | Myelin protein zero-like protein 2                                   | o |
| MRC2_HUMAN   | MRC2      | C-type mannose receptor 2                                            | o |
| MYCT1_HUMAN  | MYCT1     | Myc target protein 1                                                 | o |
| NFIP1_HUMAN  | NDFIP1    | NEDD4 family-interacting protein 1                                   | o |
| NID1_HUMAN   | NID1      | Nidogen-1                                                            | o |
| NID2_HUMAN   | NID2      | Nidogen-2                                                            | o |
| NOTCH2_HUMAN | NOTCH2    | Neurogenic locus notch homolog protein 2                             | o |
| PCLO_HUMAN   | PCLO      | Protein piccolo                                                      | o |
| PEDF_HUMAN   | SERPINF1  | Pigment epithelium-derived factor                                    | o |
| PGBM_HUMAN   | HSPG2     | Basement membrane-specific heparan sulfate proteoglycan core protein | o |
| PKHB2_HUMAN  | PLEKHB2   | Pleckstrin homology domain-containing family B member 2              | o |
| PKP2_HUMAN   | PKP2      | Plakophilin-2                                                        | o |
| PLXA1_HUMAN  | PLXNA1    | Plexin-A1                                                            | o |
| PLXD1_HUMAN  | PLXND1    | Plexin-D1                                                            | o |
| PORIM_HUMAN  | TMEM123   | Porimin                                                              | o |
| PPAL_HUMAN   | ACP2      | Lysosomal acid phosphatase                                           | o |
| PRSS23_HUMAN | PRSS23    | Serine protease 23                                                   | o |
| PTK7_HUMAN   | PTK7      | Inactive tyrosine-protein kinase 7                                   | o |
| PTPRA_HUMAN  | PTPRA     | Receptor-type tyrosine-protein phosphatase alpha                     | o |
| PTPRF_HUMAN  | PTPRF     | Receptor-type tyrosine-protein phosphatase F                         | o |
| PXDN_HUMAN   | PXDN      | Peroxidasin homolog                                                  | o |
| R39L5_HUMAN  | RPL39P5   | Putative 60S ribosomal protein L39-like 5                            | o |
| RAP2B_HUMAN  | RAP2B     | Ras-related protein Rap-2b                                           | o |
| RASK_HUMAN   | KRAS      | GTPase KRas                                                          | o |
| RB11A_HUMAN  | RAB11A    | Ras-related protein Rab-11A                                          | o |

|              |           |                                                       |   |
|--------------|-----------|-------------------------------------------------------|---|
| RGS19_HUMAN  | RGS19     | Regulator of G-protein signaling 19                   | o |
| RL22_HUMAN   | RPL22     | 60S ribosomal protein L22                             | o |
| RN149_HUMAN  | RNF149    | E3 ubiquitin-protein ligase RNF149                    | o |
| S12A2_HUMAN  | SLC12A2   | Solute carrier family 12 member 2                     | o |
| S20A1_HUMAN  | SLC20A1   | Sodium-dependent phosphate transporter 1              | o |
| S29A1_HUMAN  | SLC29A1   | Equilibrative nucleoside transporter 1                | o |
| S38A2_HUMAN  | SLC38A2   | Sodium-coupled neutral amino acid transporter 2       | o |
| SDC4_HUMAN   | SDC4      | Syndecan-4                                            | o |
| SHRM2_HUMAN  | SHROOM2   | Protein Shroom2                                       | o |
| SMAD2_HUMAN  | SMAD2     | Mothers against decapentaplegic homolog 2             | o |
| SMOC1_HUMAN  | SMOC1     | SPARC-related modular calcium-binding protein 1       | o |
| SRC_HUMAN    | SRC       | Proto-oncogene tyrosine-protein kinase Src            | o |
| SRGN_HUMAN   | SRGN      | Serglycin                                             | o |
| SRGP2_HUMAN  | SRGAP2    | SLIT-ROBO Rho GTPase-activating protein 2             | o |
| TBA4A_HUMAN  | TUBA4A    | Tubulin alpha-4A chain                                | o |
| TBB1_HUMAN   | TUBB1     | Tubulin beta-1 chain                                  | o |
| TEN3_HUMAN   | TENM3     | Teneurin-3                                            | o |
| TINAL_HUMAN  | TINAGL1   | Tubulointerstitial nephritis antigen-like             | o |
| TNAP3_HUMAN  | TNFAIP3   | Tumor necrosis factor alpha-induced protein 3         | o |
| TNIP1_HUMAN  | TNIP1     | TNFAIP3-interacting protein 1                         | o |
| TOLLIP_HUMAN | TOLLIP    | Toll-interacting protein                              | o |
| TR10B_HUMAN  | TNFRSF10B | Tumor necrosis factor receptor superfamily member 10B | o |
| TRFM_HUMAN   | MELTF     | Melanotransferrin                                     | o |
| TS101_HUMAN  | TSG101    | Tumor susceptibility gene 101 protein                 | o |
| TSN14_HUMAN  | TSPAN14   | Tetraspanin-14                                        | o |
| TSN3_HUMAN   | TSPAN3    | Tetraspanin-3                                         | o |
| TSN5_HUMAN   | TSPAN5    | Tetraspanin-5                                         | o |
| TSN9_HUMAN   | TSPAN9    | Tetraspanin-9                                         | o |
| TSP4_HUMAN   | THBS4     | Thrombospondin-4                                      | o |
| TTYH3_HUMAN  | TTYH3     | Protein tweety homolog 3                              | o |
| VP37C_HUMAN  | VPS37C    | Vacuolar protein sorting-associated protein 37C       | o |
| VPS4A_HUMAN  | VPS4A     | Vacuolar protein sorting-associated protein 4A        | o |
| WASF2_HUMAN  | WASF2     | Wiskott-Aldrich syndrome protein family member 2      | o |
| XIRP2_HUMAN  | XIRP2     | Xin actin-binding repeat-containing protein 2         | o |
| ZDHC5_HUMAN  | ZDHC5     | Palmitoyltransferase ZDHC5                            | o |
| ZNF644_HUMAN | ZNF644    | Zinc finger protein 644                               | o |
| ZNT1_HUMAN   | SLC30A1   | Zinc transporter 1                                    | o |



|             |         |                                                                              |          |      |    |          |      |    |
|-------------|---------|------------------------------------------------------------------------------|----------|------|----|----------|------|----|
| S61A1_HUMAN | SEC61A1 | Protein transport protein Sec61 subunit alpha isoform 1                      | 1.86E-05 | 3.92 | 2  |          |      |    |
| RL36_HUMAN  | RPL36   | 60S ribosomal protein L36                                                    | 2.15E-05 | 3.91 | 2  | 1.19E-05 | 2.09 | 6  |
| SRS11_HUMAN | SRSF11  | Serine/arginine-rich splicing factor 11                                      | 7.46E-03 | 3.85 | 2  | 1.64E-03 | 1.93 | 2  |
| RL18_HUMAN  | RPL18   | 60S ribosomal protein L18                                                    | 1.74E-06 | 3.78 | 3  | 9.69E-09 | 2.92 | 9  |
| ACTC_HUMAN  | ACTC1   | Actin, alpha cardiac muscle 1                                                | 1.58E-05 | 3.77 | 2  |          |      |    |
| RL13_HUMAN  | RPL13   | 60S ribosomal protein L13                                                    | 1.16E-07 | 3.74 | 9  | 1.79E-05 | 1.78 | 11 |
| PP1B_HUMAN  | PP1B    | Peptidyl-prolyl cis-trans isomerase B                                        | 2.15E-06 | 3.74 | 3  |          |      |    |
| CAPR1_HUMAN | CAPRIN1 | Caprin-1                                                                     | 5.17E-04 | 3.65 | 2  |          |      |    |
| GPX1_HUMAN  | GPX1    | Glutathione peroxidase 1                                                     | 1.66E-07 | 3.55 | 2  |          |      |    |
| IMB1_HUMAN  | KPNB1   | Importin subunit beta-1                                                      | 7.24E-07 | 3.52 | 4  |          |      |    |
| RS12_HUMAN  | RPS12   | 40S ribosomal protein S12                                                    | 3.42E-07 | 3.51 | 6  | 1.04E-05 | 2.06 | 4  |
| COX5A_HUMAN | COX5A   | Cytochrome c oxidase subunit 5A, mitochondrial                               | 4.51E-05 | 3.48 | 2  |          |      |    |
| NOMO1_HUMAN | NOMO1   | Nodal modulator 1                                                            | 1.34E-03 | 3.47 | 2  |          |      |    |
| RAB8B_HUMAN | RAB8B   | Ras-related protein Rab-8B                                                   | 2.15E-06 | 3.36 | 2  | 8.47E-03 | 2.54 | 2  |
| RS15A_HUMAN | RPS15A  | 40S ribosomal protein S15a                                                   | 5.37E-07 | 3.32 | 6  | 8.42E-05 | 1.82 | 8  |
| DYN2_HUMAN  | DNM2    | Dynammin-2                                                                   | 1.75E-06 | 3.31 | 2  |          |      |    |
| QCR2_HUMAN  | UQCRC2  | Cytochrome b-c1 complex subunit 2, mitochondrial                             | 2.12E-04 | 3.21 | 2  |          |      |    |
| RS4X_HUMAN  | RPS4X   | 40S ribosomal protein S4, X isoform                                          | 1.37E-08 | 3.20 | 5  | 2.01E-05 | 2.03 | 11 |
| RL21_HUMAN  | RPL21   | 60S ribosomal protein L21                                                    | 9.57E-10 | 3.17 | 3  | 3.08E-04 | 1.82 | 8  |
| RM41_HUMAN  | MRPL41  | 39S ribosomal protein L41, mitochondrial                                     | 6.73E-05 | 3.17 | 2  |          |      |    |
| LGUL_HUMAN  | GLO1    | Lactoylglutathione lyase                                                     | 1.46E-06 | 3.17 | 3  |          |      |    |
| RL34_HUMAN  | RPL34   | 60S ribosomal protein L34                                                    | 1.14E-06 | 3.16 | 3  |          |      |    |
| GBLP_HUMAN  | RACK1   | Guanine nucleotide-binding protein subunit beta-2-like 1                     | 1.35E-08 | 3.11 | 8  | 4.04E-05 | 2.46 | 6  |
| SMC1A_HUMAN | SMC1A   | Structural maintenance of chromosomes protein 1A                             | 3.18E-05 | 3.11 | 4  |          |      |    |
| NDUA8_HUMAN | NDUFA8  | NADH dehydrogenase [ubiquinone] 1 alpha subcomplex subunit 8                 | 1.29E-04 | 3.09 | 2  |          |      |    |
| RL17_HUMAN  | RPL17   | 60S ribosomal protein L17                                                    | 1.04E-05 | 3.06 | 2  | 8.40E-05 | 1.58 | 6  |
| HYOU1_HUMAN | HYOU1   | Hypoxia up-regulated protein 1                                               | 7.47E-04 | 2.97 | 2  |          |      |    |
| AT1B3_HUMAN | ATP1B3  | Sodium/potassium-transporting ATPase subunit beta-3                          | 1.30E-05 | 2.96 | 2  |          |      |    |
| SDM3_HUMAN  | SNRPD3  | Small nuclear ribonucleoprotein Sm D3                                        | 2.15E-06 | 2.96 | 2  | 2.19E-04 | 2.54 | 2  |
| NDUA9_HUMAN | NDUFA9  | NADH dehydrogenase [ubiquinone] 1 alpha subcomplex subunit 9, mitochondrial  | 2.66E-04 | 2.95 | 2  |          |      |    |
| RAB8A_HUMAN | RAB8A   | Ras-related protein Rab-8A                                                   | 1.19E-05 | 2.92 | 2  | 1.06E-05 | 2.85 | 2  |
| SPP2A_HUMAN | SPLL2A  | Signal peptide peptidase-like 2A                                             | 4.08E-07 | 2.86 | 2  | 1.67E-04 | 1.54 | 2  |
| RL14_HUMAN  | RPL14   | 60S ribosomal protein L14                                                    | 1.02E-06 | 2.86 | 6  | 3.80E-06 | 2.21 | 7  |
| RAC2_HUMAN  | RAC2    | Ras-related C3 botulinum toxin substrate 2                                   | 6.26E-06 | 2.84 | 2  | 1.58E-04 | 2.39 | 2  |
| LCAP_HUMAN  | LNPEP   | Leucyl-cystinyl aminopeptidase                                               | 2.20E-05 | 2.82 | 2  |          |      |    |
| RL29_HUMAN  | RPL29   | 60S ribosomal protein L29                                                    | 1.84E-06 | 2.82 | 2  | 1.64E-05 | 1.59 | 5  |
| RL4_HUMAN   | RPL4    | 60S ribosomal protein L4                                                     | 2.57E-07 | 2.72 | 6  | 3.27E-08 | 2.70 | 12 |
| NIBL1_HUMAN | FAM129B | Niban-like protein 1                                                         | 1.01E-06 | 2.70 | 5  |          |      |    |
| NP11_HUMAN  | NAP11   | Nucleosome assembly protein 1-like 1                                         | 7.08E-05 | 2.69 | 2  |          |      |    |
| RL27A_HUMAN | RPL27A  | 60S ribosomal protein L27a                                                   | 4.25E-07 | 2.65 | 6  | 7.38E-06 | 1.91 | 7  |
| CD2A1_HUMAN | CDKN2A  | Cyclin-dependent kinase inhibitor 2A, isoforms 1/2/3                         | 3.75E-05 | 2.58 | 4  |          |      |    |
| RS18_HUMAN  | RPS18   | 40S ribosomal protein S18                                                    | 1.66E-06 | 2.46 | 5  | 5.75E-06 | 2.02 | 4  |
| RM15_HUMAN  | MRPL15  | 39S ribosomal protein L15, mitochondrial                                     | 5.24E-05 | 2.46 | 2  |          |      |    |
| SMC4_HUMAN  | SMC4    | Structural maintenance of chromosomes protein 4                              | 1.30E-04 | 2.43 | 2  |          |      |    |
| GSTP1_HUMAN | GSTP1   | Glutathione S-transferase P                                                  | 1.05E-04 | 2.42 | 3  |          |      |    |
| RL26_HUMAN  | RPL26   | 60S ribosomal protein L26                                                    | 2.75E-06 | 2.42 | 5  |          |      |    |
| SGTA_HUMAN  | SGTA    | Small glutamine-rich tetratricopeptide repeat-containing protein alpha       | 7.13E-07 | 2.40 | 2  |          |      |    |
| TM9S3_HUMAN | TM9SF3  | Transmembrane 9 superfamily member 3                                         | 3.97E-04 | 2.38 | 2  |          |      |    |
| ITPR3_HUMAN | ITPR3   | Inositol 1,4,5-trisphosphate receptor type 3                                 | 2.80E-05 | 2.33 | 2  |          |      |    |
| RL24_HUMAN  | RPL24   | 60S ribosomal protein L24                                                    | 3.86E-07 | 2.32 | 7  | 2.94E-05 | 2.73 | 7  |
| RS8_HUMAN   | RPS8    | 40S ribosomal protein S8                                                     | 1.47E-06 | 2.32 | 8  | 1.09E-05 | 2.11 | 14 |
| TMED7_HUMAN | TMED7   | Transmembrane emp24 domain-containing protein 7                              | 6.01E-05 | 2.31 | 3  |          |      |    |
| RS3A_HUMAN  | RPS3A   | 40S ribosomal protein S3a                                                    | 1.85E-05 | 2.30 | 7  | 5.23E-05 | 1.73 | 10 |
| PABP1_HUMAN | PABPC1  | Polyadenylate-binding protein 1                                              | 1.87E-08 | 2.30 | 10 | 9.54E-06 | 3.73 | 2  |
| RL31_HUMAN  | RPL31   | 60S ribosomal protein L31                                                    | 2.73E-04 | 2.28 | 2  | 2.00E-05 | 1.51 | 6  |
| NUCB1_HUMAN | NUCB1   | Nucleobindin-1                                                               | 3.11E-06 | 2.27 | 2  |          |      |    |
| PRDX2_HUMAN | PRDX2   | Peroxiredoxin-2                                                              | 1.73E-05 | 2.27 | 4  |          |      |    |
| ERG1_HUMAN  | ERGIC1  | Endoplasmic reticulum-Golgi intermediate compartment protein 1               | 5.82E-06 | 2.27 | 2  |          |      |    |
| RL19_HUMAN  | RPL19   | 60S ribosomal protein L19                                                    | 2.31E-04 | 2.26 | 3  | 9.23E-06 | 2.87 | 6  |
| PTBP1_HUMAN | PTBP1   | Poly(pyrimidine tract-binding protein 1                                      | 1.82E-05 | 2.26 | 2  |          |      |    |
| RS26_HUMAN  | RPS26   | 40S ribosomal protein S26                                                    | 3.03E-03 | 2.24 | 2  | 1.96E-05 | 1.59 | 3  |
| RALY_HUMAN  | RALY    | RNA-binding protein Raly                                                     | 4.00E-07 | 2.23 | 3  |          |      |    |
| AHSA1_HUMAN | AHSA1   | Activator of 90 kDa heat shock protein ATPase homolog 1                      | 1.88E-03 | 2.20 | 3  |          |      |    |
| RL5_HUMAN   | RPL5    | 60S ribosomal protein L5                                                     | 8.01E-06 | 2.20 | 4  | 4.21E-04 | 1.53 | 10 |
| RS6_HUMAN   | RPS6    | 40S ribosomal protein S6                                                     | 4.45E-06 | 2.19 | 3  | 1.91E-05 | 1.62 | 9  |
| HBE_HUMAN   | HBE1    | Hemoglobin subunit epsilon                                                   | 7.62E-06 | 2.19 | 2  | 5.54E-07 | 3.15 | 2  |
| SYRC_HUMAN  | RARS    | Arginine-tRNA ligase, cytoplasmic                                            | 1.70E-05 | 2.16 | 3  |          |      |    |
| HNRPO_HUMAN | SYNCRIP | Heterogeneous nuclear ribonucleoprotein Q                                    | 2.74E-05 | 2.13 | 3  |          |      |    |
| RL27_HUMAN  | RPL27   | 60S ribosomal protein L27                                                    | 1.38E-04 | 2.13 | 3  |          |      |    |
| PCH2_HUMAN  | TRIP13  | Pachytene checkpoint protein 2 homolog                                       | 3.41E-04 | 2.11 | 2  |          |      |    |
| RLAOL_HUMAN | RPLP0P6 | 60S acidic ribosomal protein P0-like                                         | 3.07E-06 | 2.11 | 5  |          |      |    |
| TARA_HUMAN  | TRIOBP  | TRIO and F-actin-binding protein                                             | 3.38E-04 | 2.10 | 2  |          |      |    |
| DDX5_HUMAN  | DDX5    | Probable ATP-dependent RNA helicase DDX5                                     | 6.06E-05 | 2.10 | 5  |          |      |    |
| U551_HUMAN  | EFTUD2  | 116 kDa U5 small nuclear ribonucleoprotein component                         | 6.23E-05 | 2.04 | 3  |          |      |    |
| IF5A1_HUMAN | EIF5A   | Eukaryotic translation initiation factor 5A-1                                | 2.07E-05 | 2.04 | 2  |          |      |    |
| RL8_HUMAN   | RPL8    | 60S ribosomal protein L8                                                     | 4.92E-06 | 2.03 | 4  | 6.16E-07 | 1.65 | 10 |
| PARK7_HUMAN | PARK7   | Protein deglycase DJ-1                                                       | 3.85E-04 | 2.01 | 2  |          |      |    |
| DDX21_HUMAN | DDX21   | Nucleolar RNA helicase 2                                                     | 1.74E-04 | 2.01 | 3  |          |      |    |
| STXB1_HUMAN | STXBP1  | Syntaxin-binding protein 1                                                   | 8.53E-06 | 2.00 | 2  |          |      |    |
| PODXL_HUMAN | PODXL   | Podocalyxin                                                                  | 9.88E-06 | 1.97 | 3  |          |      |    |
| S27A4_HUMAN | SLC27A4 | Long-chain fatty acid transport protein 4                                    | 2.06E-04 | 1.96 | 2  |          |      |    |
| RAP2C_HUMAN | RAP2C   | Ras-related protein Rap-2c                                                   | 4.08E-08 | 1.96 | 2  |          |      |    |
| RL18A_HUMAN | RPL18A  | 60S ribosomal protein L18a                                                   | 8.01E-06 | 1.96 | 8  |          |      |    |
| SLIRP_HUMAN | SLIRP   | SRA stem-loop-interacting RNA-binding protein, mitochondrial                 | 2.05E-04 | 1.95 | 2  |          |      |    |
| HSDL2_HUMAN | HSDL2   | Hydroxysteroid dehydrogenase-like protein 2                                  | 2.62E-05 | 1.95 | 2  |          |      |    |
| KGUA_HUMAN  | GUK1    | Guanylate kinase                                                             | 4.93E-04 | 1.92 | 3  |          |      |    |
| STT3A_HUMAN | STT3A   | Dolichyl-diphosphooligosaccharide--protein glycosyltransferase subunit STT3A | 5.36E-03 | 1.92 | 2  |          |      |    |
| VIGLN_HUMAN | HDLBP   | Vigilin                                                                      | 2.99E-06 | 1.91 | 3  |          |      |    |
| ECHB_HUMAN  | HADHB   | Trifunctional enzyme subunit beta, mitochondrial                             | 1.49E-05 | 1.91 | 3  |          |      |    |
| SNX3_HUMAN  | SNX3    | Sorting nexin-3                                                              | 8.60E-06 | 1.91 | 4  |          |      |    |
| GPAA1_HUMAN | GPAA1   | Glycosylphosphatidylinositol anchor attachment 1 protein                     | 3.80E-04 | 1.91 | 2  |          |      |    |
| PRAF3_HUMAN | ARL6IP5 | PRA1 family protein 3                                                        | 1.02E-06 | 1.90 | 2  |          |      |    |
| RS11_HUMAN  | RPS11   | 40S ribosomal protein S11                                                    | 2.18E-05 | 1.90 | 10 | 2.22E-05 | 1.50 | 11 |
| RS2_HUMAN   | RPS2    | 40S ribosomal protein S2                                                     | 8.06E-06 | 1.89 | 3  | 1.26E-04 | 1.60 | 6  |
| ADT2_HUMAN  | SLC25A5 | ADP/ATP translocase 2                                                        | 3.44E-06 | 1.88 | 3  |          |      |    |
| RS23_HUMAN  | RPS23   | 40S ribosomal protein S23                                                    | 9.75E-06 | 1.88 | 2  |          |      |    |

|              |          |                                                                                   |          |      |    |          |      |    |
|--------------|----------|-----------------------------------------------------------------------------------|----------|------|----|----------|------|----|
| PCBP2_HUMAN  | PCBP2    | Poly(rC)-binding protein 2                                                        | 2.21E-06 | 1.88 | 2  | 7.11E-07 | 3.37 | 2  |
| RL6_HUMAN    | RPL6     | 60S ribosomal protein L6                                                          | 9.96E-08 | 1.87 | 10 |          |      |    |
| G3P_HUMAN    | GAPDH    | Glyceraldehyde-3-phosphate dehydrogenase                                          | 2.13E-06 | 1.86 | 11 | 3.77E-06 | 2.14 | 11 |
| ENAH_HUMAN   | ENAH     | Protein enabled homolog                                                           | 1.94E-05 | 1.83 | 3  |          |      |    |
| UBXN1_HUMAN  | UBXN1    | UBX domain-containing protein 1                                                   | 2.78E-03 | 1.83 | 2  |          |      |    |
| RL15_HUMAN   | RPL15    | 60S ribosomal protein L15                                                         | 2.65E-05 | 1.83 | 2  | 1.00E-03 | 1.57 | 3  |
| CYR61_HUMAN  | CYR61    | Protein CYR61                                                                     | 2.32E-06 | 1.82 | 4  |          |      |    |
| JAK1_HUMAN   | JAK1     | Tyrosine-protein kinase JAK1                                                      | 1.65E-03 | 1.81 | 2  |          |      |    |
| UBP10_HUMAN  | USP10    | Ubiquitin carboxyl-terminal hydrolase 10                                          | 9.28E-04 | 1.79 | 2  |          |      |    |
| XRCC5_HUMAN  | XRCC5    | X-ray repair cross-complementing protein 5                                        | 1.11E-05 | 1.78 | 7  |          |      |    |
| RS16_HUMAN   | RPS16    | 40S ribosomal protein S16                                                         | 4.57E-06 | 1.78 | 5  | 3.38E-04 | 1.60 | 6  |
| P5CS_HUMAN   | ALDH18A1 | Delta-1-pyrroline-5-carboxylate synthase                                          | 5.99E-04 | 1.78 | 4  |          |      |    |
| 2AAA_HUMAN   | PPP2R1A  | Serine/threonine-protein phosphatase 2A 65 kDa regulatory subunit A alpha isoform | 1.33E-04 | 1.78 | 4  |          |      |    |
| DPYL3_HUMAN  | DPYL3    | Dihydropyrimidinase-related protein 3                                             | 3.21E-04 | 1.77 | 2  |          |      |    |
| ARL2_HUMAN   | ARL2     | ADP-ribosylation factor-like protein 2                                            | 9.92E-04 | 1.77 | 2  |          |      |    |
| COPB2_HUMAN  | COPB2    | Coatomer subunit beta'                                                            | 7.31E-06 | 1.77 | 3  |          |      |    |
| MPCP_HUMAN   | SLC25A3  | Phosphate carrier protein, mitochondrial                                          | 5.26E-05 | 1.76 | 2  |          |      |    |
| US20_HUMAN   | SNRNP200 | U5 small nuclear ribonucleoprotein 200 kDa helicase                               | 2.64E-03 | 1.75 | 2  | 2.18E-03 | 1.92 | 2  |
| GPDM_HUMAN   | GPD2     | Glycerol-3-phosphate dehydrogenase, mitochondrial                                 | 6.56E-04 | 1.74 | 3  |          |      |    |
| SPTCS_HUMAN  | SPG11    | Spatacsin                                                                         | 4.57E-05 | 1.74 | 2  |          |      |    |
| MAP4_HUMAN   | MAP4     | Microtubule-associated protein 4                                                  | 1.26E-06 | 1.74 | 3  | 6.87E-04 | 3.64 | 2  |
| RTN4_HUMAN   | RTN4     | Reticulon-4                                                                       | 6.86E-07 | 1.73 | 3  |          |      |    |
| AT1B1_HUMAN  | ATP1B1   | Sodium/potassium-transporting ATPase subunit beta-1                               | 5.38E-04 | 1.73 | 3  |          |      |    |
| RSSA_HUMAN   | RPSA     | 40S ribosomal protein SA                                                          | 9.51E-07 | 1.73 | 7  |          |      |    |
| UBA1_HUMAN   | UBA1     | Ubiquitin-like modifier-activating enzyme 1                                       | 1.82E-05 | 1.71 | 5  |          |      |    |
| RS20_HUMAN   | RPS20    | 40S ribosomal protein S20                                                         | 8.87E-08 | 1.71 | 3  |          |      |    |
| RL23_HUMAN   | RPL23    | 60S ribosomal protein L23                                                         | 4.86E-06 | 1.71 | 4  |          |      |    |
| G3BP2_HUMAN  | G3BP2    | Ras GTPase-activating protein-binding protein 2                                   | 1.15E-05 | 1.70 | 2  |          |      |    |
| CY1_HUMAN    | CYC1     | Cytochrome c1, heme protein, mitochondrial                                        | 1.88E-03 | 1.70 | 2  |          |      |    |
| RS3_HUMAN    | RPS3     | 40S ribosomal protein S3                                                          | 4.23E-07 | 1.69 | 12 |          |      |    |
| RASL3_HUMAN  | RASAL3   | RAS protein activator like-3                                                      | 8.86E-04 | 1.69 | 3  |          |      |    |
| TCPA_HUMAN   | TCP1     | T-complex protein 1 subunit alpha                                                 | 8.74E-07 | 1.69 | 11 | 1.92E-05 | 2.31 | 6  |
| P53_HUMAN    | TP53     | Cellular tumor antigen p53                                                        | 4.52E-03 | 1.68 | 2  |          |      |    |
| NUMA1_HUMAN  | NUMA1    | Nuclear mitotic apparatus protein 1                                               | 2.52E-04 | 1.68 | 3  |          |      |    |
| HDAC1_HUMAN  | HDAC1    | Histone deacetylase 1                                                             | 2.49E-03 | 1.68 | 2  |          |      |    |
| PARP4_HUMAN  | PARP4    | Poly [ADP-ribose] polymerase 4                                                    | 1.40E-04 | 1.67 | 2  |          |      |    |
| TCPZ_HUMAN   | CCT6A    | T-complex protein 1 subunit zeta                                                  | 6.43E-07 | 1.66 | 8  |          |      |    |
| TALDO_HUMAN  | TALDO1   | Transaldolase                                                                     | 1.42E-04 | 1.66 | 3  |          |      |    |
| TPIS_HUMAN   | TP1      | Triosephosphate isomerase                                                         | 4.05E-06 | 1.66 | 6  |          |      |    |
| RAB2A_HUMAN  | RAB2A    | Ras-related protein Rab-2A                                                        | 4.67E-05 | 1.66 | 2  |          |      |    |
| KCC2D_HUMAN  | CAMK2D   | Calcium/calmodulin-dependent protein kinase type II subunit delta                 | 5.72E-03 | 1.65 | 2  |          |      |    |
| ETFB_HUMAN   | ETFB     | Electron transfer flavoprotein subunit beta                                       | 2.33E-05 | 1.65 | 5  |          |      |    |
| PCBP1_HUMAN  | PCBP1    | Poly(rC)-binding protein 1                                                        | 1.81E-07 | 1.64 | 4  |          |      |    |
| VAPB_HUMAN   | VAPB     | Vesicle-associated membrane protein-associated protein B/C                        | 3.18E-03 | 1.64 | 2  |          |      |    |
| CHM4B_HUMAN  | CHMP4B   | Charged multivesicular body protein 4b                                            | 5.46E-05 | 1.63 | 3  | 4.89E-06 | 1.59 | 4  |
| PSMD1_HUMAN  | PSMD1    | 26S proteasome non-ATPase regulatory subunit 1                                    | 4.60E-05 | 1.63 | 4  |          |      |    |
| RHOC_HUMAN   | RHOC     | Rho-related GTP-binding protein RhoC                                              | 1.43E-05 | 1.63 | 2  |          |      |    |
| ABCF2_HUMAN  | ABCF2    | ATP-binding cassette sub-family F member 2                                        | 3.07E-04 | 1.63 | 2  |          |      |    |
| MAOM_HUMAN   | ME2      | NAD-dependent malic enzyme, mitochondrial                                         | 1.49E-04 | 1.62 | 2  |          |      |    |
| RAB5C_HUMAN  | RAB5C    | Ras-related protein Rab-5C                                                        | 2.68E-03 | 1.61 | 3  |          |      |    |
| NDU51_HUMAN  | NDUFS1   | NADH-ubiquinone oxidoreductase 75 kDa subunit, mitochondrial                      | 2.66E-05 | 1.61 | 3  |          |      |    |
| ATPG_HUMAN   | ATP5C1   | ATP synthase subunit gamma, mitochondrial                                         | 3.59E-04 | 1.61 | 3  |          |      |    |
| RL3_HUMAN    | RPL3     | 60S ribosomal protein L3                                                          | 2.09E-06 | 1.60 | 8  |          |      |    |
| RL7_HUMAN    | RPL7     | 60S ribosomal protein L7                                                          | 4.31E-08 | 1.60 | 5  |          |      |    |
| EIF3A_HUMAN  | EIF3A    | Eukaryotic translation initiation factor 3 subunit A                              | 5.40E-06 | 1.60 | 7  | 2.73E-03 | 1.51 | 8  |
| APOM_HUMAN   | APOM     | Apolipoprotein M                                                                  | 4.49E-04 | 1.59 | 2  |          |      |    |
| RL10_HUMAN   | RPL10    | 60S ribosomal protein L10                                                         | 7.23E-06 | 1.59 | 5  | 4.16E-05 | 1.63 | 6  |
| ABCE1_HUMAN  | ABCE1    | ATP-binding cassette sub-family E member 1                                        | 1.54E-04 | 1.59 | 2  |          |      |    |
| ACTN1_HUMAN  | ACTN1    | Alpha-actinin-1                                                                   | 1.50E-06 | 1.59 | 10 |          |      |    |
| ARPC2_HUMAN  | ARPC2    | Actin-related protein 2/3 complex subunit 2                                       | 2.63E-04 | 1.59 | 2  |          |      |    |
| SEC23A_HUMAN | SEC23A   | Protein transport protein Sec23A                                                  | 3.60E-05 | 1.59 | 2  |          |      |    |
| RAB10_HUMAN  | RAB10    | Ras-related protein Rab-10                                                        | 4.69E-05 | 1.56 | 2  |          |      |    |
| RL37A_HUMAN  | RPL37A   | 60S ribosomal protein L37a                                                        | 1.99E-06 | 1.56 | 3  |          |      |    |
| TGM2_HUMAN   | TGM2     | Protein-glutamine gamma-glutamyltransferase 2                                     | 1.54E-06 | 1.55 | 11 | 9.57E-05 | 1.69 | 3  |
| PRS6B_HUMAN  | PSMC4    | 26S protease regulatory subunit 6B                                                | 3.77E-05 | 1.55 | 2  |          |      |    |
| EEF1G_HUMAN  | EEF1G    | Elongation factor 1-gamma                                                         | 1.34E-05 | 1.54 | 6  |          |      |    |
| ADT3_HUMAN   | SLC25A6  | ADP/ATP translocase 3                                                             | 1.99E-05 | 1.54 | 5  |          |      |    |
| RS7_HUMAN    | RPS7     | 40S ribosomal protein S7                                                          | 1.69E-05 | 1.53 | 9  |          |      |    |
| GNAI3_HUMAN  | GNAI3    | Guanine nucleotide-binding protein G(k) subunit alpha                             | 3.43E-05 | 1.53 | 3  | 1.49E-04 | 1.64 | 5  |
| RAB7A_HUMAN  | RAB7A    | Ras-related protein Rab-7a                                                        | 1.13E-05 | 1.52 | 8  | 2.02E-04 | 1.55 | 7  |
| TR150_HUMAN  | THRAP3   | Thyroid hormone receptor-associated protein 3                                     | 8.57E-03 | 1.51 | 2  |          |      |    |
| FBL_HUMAN    | FBL      | rRNA 2'-O-methyltransferase fibrillar                                             | 3.45E-04 | 1.50 | 3  |          |      |    |
| IF2B2_HUMAN  | IGF2BP2  | Insulin-like growth factor 2 mRNA-binding protein 2                               | 3.89E-04 | 1.50 | 4  |          |      |    |
| CERS2_HUMAN  | CERS2    | Ceramide synthase 2                                                               | 3.83E-04 | 1.67 | 2  |          |      |    |
| COX5B_HUMAN  | COX5B    | Cytochrome c oxidase subunit 5B, mitochondrial                                    | 5.12E-05 | 1.67 | 4  |          |      |    |
| TFR1_HUMAN   | TFR1     | Transferrin receptor protein 1                                                    | 1.10E-07 | 1.67 | 5  | 1.10E-05 | 0.57 | 3  |
| IF6_HUMAN    | EIF6     | Eukaryotic translation initiation factor 6                                        | 9.40E-05 | 1.67 | 4  |          |      |    |
| AAAT_HUMAN   | SLC1A5   | Neutral amino acid transporter B(0)                                               | 2.76E-05 | 1.66 | 4  | 1.28E-05 | 0.53 | 7  |
| RSMN_HUMAN   | SNRPN    | Small nuclear ribonucleoprotein-associated protein N                              | 4.78E-06 | 1.66 | 2  |          |      |    |
| LDHB_HUMAN   | LDHB     | L-lactate dehydrogenase B chain                                                   | 4.17E-06 | 1.66 | 5  | 3.95E-04 | 0.66 | 2  |
| MLEC_HUMAN   | MLEC     | Malectin                                                                          | 7.95E-05 | 1.66 | 3  |          |      |    |
| FHL2_HUMAN   | FHL2     | Four and a half LIM domains protein 2                                             | 9.68E-04 | 1.66 | 2  |          |      |    |
| TPM1_HUMAN   | TPM1     | Tropomyosin alpha-1 chain                                                         | 9.45E-05 | 1.66 | 2  |          |      |    |
| CN37_HUMAN   | CNP      | 2',3'-cyclic-nucleotide 3'-phosphodiesterase                                      | 1.85E-04 | 1.65 | 4  |          |      |    |
| ADAS_HUMAN   | AGPS     | Alkyldihydroxyacetonephosphate synthase, peroxisomal                              | 7.92E-05 | 1.65 | 4  |          |      |    |
| PUR4_HUMAN   | PFAS     | Phosphoribosylformylglycinamide synthase                                          | 2.52E-04 | 1.65 | 4  |          |      |    |
| ARP3_HUMAN   | ACTR3    | Actin-related protein 3                                                           | 9.34E-07 | 1.65 | 5  |          |      |    |
| XPO2_HUMAN   | CSE1L    | Exportin-2                                                                        | 3.56E-03 | 1.65 | 3  |          |      |    |
| MPRI_HUMAN   | IGF2R    | Cation-independent mannose-6-phosphate receptor                                   | 2.19E-05 | 1.65 | 4  |          |      |    |
| EDC4_HUMAN   | EDC4     | Enhancer of mRNA-decapping protein 4                                              | 1.23E-04 | 1.64 | 3  |          |      |    |
| RFTN1_HUMAN  | RFTN1    | Raftlin                                                                           | 1.16E-05 | 1.64 | 6  | 3.78E-05 | 0.57 | 10 |
| RM21_HUMAN   | MRPL21   | 39S ribosomal protein L21, mitochondrial                                          | 7.38E-05 | 1.64 | 2  |          |      |    |
| ALBU_HUMAN   | ALB      | Serum albumin                                                                     | 8.94E-06 | 1.64 | 4  | 3.08E-06 | 0.55 | 5  |
| HN1_HUMAN    | HN1      | Hematological and neurological expressed 1 protein                                | 8.76E-04 | 1.63 | 2  |          |      |    |
| FSCN1_HUMAN  | FSCN1    | Fascin                                                                            | 2.92E-05 | 1.63 | 3  |          |      |    |
| NRP1_HUMAN   | NRP1     | Neuropilin-1                                                                      | 7.81E-05 | 1.63 | 7  |          |      |    |
| CSRP1_HUMAN  | CSRP1    | Cysteine and glycine-rich protein 1                                               | 2.34E-04 | 1.63 | 4  | 1.16E-05 | 0.58 | 2  |

|             |          |                                                                          |          |      |    |          |       |    |
|-------------|----------|--------------------------------------------------------------------------|----------|------|----|----------|-------|----|
| GNAI2_HUMAN | GNAI2    | Guanine nucleotide-binding protein G(i) subunit alpha-2                  | 7.73E-07 | 0.63 | 9  |          |       |    |
| FKBP2_HUMAN | FKBP2    | Peptidyl-prolyl cis-trans isomerase FKBP2                                | 1.11E-04 | 0.63 | 2  |          |       |    |
| TBB6_HUMAN  | TUBB6    | Tubulin beta-6 chain                                                     | 2.09E-05 | 0.63 | 5  |          |       |    |
| RFA1_HUMAN  | RPA1     | Replication protein A 70 kDa DNA-binding subunit                         | 2.65E-03 | 0.62 | 2  |          |       |    |
| CRTAP_HUMAN | CRTAP    | Cartilage-associated protein                                             | 7.92E-05 | 0.62 | 3  |          |       |    |
| GBB2_HUMAN  | GNB2     | Guanine nucleotide-binding protein G(i)/G(s)/G(t) subunit beta-2         | 1.88E-05 | 0.62 | 5  |          |       |    |
| AKA12_HUMAN | AKAP12   | A-kinase anchor protein 12                                               | 8.15E-04 | 0.62 | 2  |          |       |    |
| RM45_HUMAN  | MRPL45   | 39S ribosomal protein L45, mitochondrial                                 | 1.06E-05 | 0.62 | 3  |          |       |    |
| MPPA_HUMAN  | PMPCA    | Mitochondrial-processing peptidase subunit alpha                         | 1.52E-04 | 0.62 | 3  |          |       |    |
| CA2D1_HUMAN | CACNA2D1 | Voltage-dependent calcium channel subunit alpha-2/delta-1                | 2.12E-03 | 0.61 | 2  |          |       |    |
| PSA7_HUMAN  | PSMA7    | Proteasome subunit alpha type-7                                          | 5.89E-05 | 0.61 | 5  |          |       |    |
| SDHA_HUMAN  | SDHA     | Succinate dehydrogenase [ubiquinone] flavoprotein subunit, mitochondrial | 1.31E-07 | 0.60 | 9  |          |       |    |
| MTA2_HUMAN  | MTA2     | Metastasis-associated protein MTA2                                       | 5.34E-05 | 0.60 | 3  |          |       |    |
| SRP14_HUMAN | SRP14    | Signal recognition particle 14 kDa protein                               | 8.70E-05 | 0.60 | 2  |          |       |    |
| MFGM_HUMAN  | MFGE8    | Lactadherin                                                              | 6.47E-05 | 0.60 | 4  |          |       |    |
| 1433E_HUMAN | YWHAE    | 14-3-3 protein epsilon                                                   | 1.02E-05 | 0.60 | 7  | 3.28E-05 | 0.61  | 6  |
| FLOT1_HUMAN | FLOT1    | Flotillin-1                                                              | 2.53E-05 | 0.60 | 4  | 1.66E-04 | 0.65  | 7  |
| 1433Z_HUMAN | YWHAZ    | 14-3-3 protein zeta/delta                                                | 4.27E-07 | 0.59 | 8  |          |       |    |
| RYR1_HUMAN  | RYR1     | Ryanodine receptor 1                                                     | 4.12E-05 | 0.59 | 3  |          |       |    |
| KIF23_HUMAN | KIF23    | Kinesin-like protein KIF23                                               | 8.27E-06 | 0.59 | 14 |          |       |    |
| CPT1A_HUMAN | CPT1A    | Carnitine O-palmitoyltransferase 1, liver isoform                        | 4.79E-05 | 0.59 | 3  |          |       |    |
| EZR_HUMAN   | EZR      | Ezrin                                                                    | 3.42E-06 | 0.59 | 9  |          |       |    |
| RASN_HUMAN  | NRAS     | GTPase NRas                                                              | 2.76E-04 | 0.59 | 2  |          |       |    |
| ADAM9_HUMAN | ADAM9    | Disintegrin and metalloproteinase domain-containing protein 9            | 1.34E-06 | 0.59 | 5  | 2.86E-05 | 0.66  | 8  |
| GRN_HUMAN   | GRN      | Granulins                                                                | 6.88E-06 | 0.59 | 2  |          |       |    |
| E41L2_HUMAN | EPB41L2  | Band 4.1-like protein 2                                                  | 1.55E-04 | 0.59 | 8  | 4.21E-04 | 0.66  | 17 |
| STIP1_HUMAN | STIP1    | Stress-induced-phosphoprotein 1                                          | 8.19E-04 | 0.58 | 2  |          |       |    |
| SIYIM_HUMAN | IARS2    | Isoleucine--tRNA ligase, mitochondrial                                   | 9.82E-05 | 0.58 | 3  |          |       |    |
| TKT_HUMAN   | TKT      | Transketolase                                                            | 9.50E-05 | 0.58 | 6  |          |       |    |
| RM13_HUMAN  | MRPL13   | 39S ribosomal protein L13, mitochondrial                                 | 1.40E-03 | 0.58 | 2  |          |       |    |
| RFC2_HUMAN  | RFC2     | Replication factor C subunit 2                                           | 7.00E-04 | 0.58 | 2  |          |       |    |
| 1433F_HUMAN | YWHAH    | 14-3-3 protein eta                                                       | 1.88E-04 | 0.58 | 2  |          |       |    |
| LAT1_HUMAN  | SLC7A5   | Large neutral amino acids transporter small subunit 1                    | 8.23E-06 | 0.58 | 3  | 7.59E-05 | 0.62  | 3  |
| GCN1L_HUMAN | GCN1     | Translational activator GCN1                                             | 2.22E-06 | 0.58 | 2  |          |       |    |
| MYPT1_HUMAN | PPP1R12A | Protein phosphatase 1 regulatory subunit 12A                             | 8.82E-06 | 0.57 | 5  |          |       |    |
| PYC_HUMAN   | PC       | Pyruvate carboxylase, mitochondrial                                      | 8.08E-05 | 0.57 | 5  |          |       |    |
| RTCB_HUMAN  | RTCB     | tRNA-splicing ligase RtcB homolog                                        | 2.44E-05 | 0.57 | 2  |          |       |    |
| EDIL3_HUMAN | EDIL3    | EGF-like repeat and discoidin I-like domain-containing protein 3         | 1.15E-06 | 0.57 | 25 | 6.43E-07 | 0.60  | 32 |
| MIC19_HUMAN | CHCHD3   | MICOS complex subunit MIC19                                              | 5.31E-04 | 0.57 | 4  |          |       |    |
| IBP7_HUMAN  | IGFBP7   | Insulin-like growth factor-binding protein 7                             | 2.80E-04 | 0.57 | 5  |          |       |    |
| A4_HUMAN    | APP      | Amyloid beta A4 protein                                                  | 5.89E-05 | 0.56 | 2  |          |       |    |
| RGAP1_HUMAN | RACGAP1  | Rac GTPase-activating protein 1                                          | 7.43E-07 | 0.56 | 12 |          |       |    |
| CBX3_HUMAN  | CBX3     | Chromobox protein homolog 3                                              | 2.65E-04 | 0.56 | 2  |          |       |    |
| STMN1_HUMAN | STMN1    | Stathmin                                                                 | 1.65E-06 | 0.56 | 2  | 8.51E-04 | 0.66  | 2  |
| RBM39_HUMAN | RBM39    | RNA-binding protein 39                                                   | 3.13E-05 | 0.56 | 2  | 1.91E-04 | 2.95  | 3  |
| NHRF2_HUMAN | SLC9A3R2 | Na(+)/H(+) exchange regulatory cofactor NHE-RF2                          | 2.76E-05 | 0.56 | 2  |          |       |    |
| RPN2_HUMAN  | RPN2     | Dolichyl-diphosphooligosaccharide--protein glycosyltransferase subunit 2 | 8.02E-07 | 0.56 | 8  |          |       |    |
| BASP1_HUMAN | BASP1    | Brain acid soluble protein 1                                             | 2.76E-03 | 0.55 | 5  |          |       |    |
| EFHD2_HUMAN | EFHD2    | EF-hand domain-containing protein D2                                     | 5.56E-04 | 0.55 | 2  |          |       |    |
| SUN2_HUMAN  | SUN2     | SUN domain-containing protein 2                                          | 3.75E-03 | 0.54 | 3  |          |       |    |
| ARP2_HUMAN  | ACTR2    | Actin-related protein 2                                                  | 8.26E-06 | 0.54 | 2  |          |       |    |
| CSK21_HUMAN | CSNK2A1  | Casein kinase II subunit alpha                                           | 2.07E-05 | 0.54 | 2  |          |       |    |
| TBB4B_HUMAN | TUBB4B   | Tubulin beta-4B chain                                                    | 1.46E-05 | 0.54 | 2  |          |       |    |
| SCRIB_HUMAN | SCRIB    | Protein scribble homolog                                                 | 1.02E-03 | 0.53 | 2  |          |       |    |
| IF2P_HUMAN  | EIF5B    | Eukaryotic translation initiation factor 5B                              | 3.39E-05 | 0.53 | 2  | 1.09E-05 | 0.52  | 3  |
| MOGS_HUMAN  | MOGS     | Mannosyl-oligosaccharide glucosidase                                     | 2.61E-04 | 0.53 | 2  |          |       |    |
| TPA_HUMAN   | PLAT     | Tissue-type plasminogen activator                                        | 1.01E-05 | 0.53 | 3  | 6.23E-05 | 0.66  | 6  |
| GBG12_HUMAN | GNL2     | Guanine nucleotide-binding protein G(i)/G(s)/G(o) subunit gamma-12       | 2.76E-06 | 0.52 | 2  |          |       |    |
| TBB2B_HUMAN | TUBB2B   | Tubulin beta-2B chain                                                    | 7.20E-05 | 0.52 | 4  |          |       |    |
| PURA2_HUMAN | ADSS     | Adenylosuccinate synthetase isozyme 2                                    | 1.03E-04 | 0.52 | 2  |          |       |    |
| HP1B3_HUMAN | HP1BP3   | Heterochromatin protein 1-binding protein 3                              | 7.19E-05 | 0.52 | 2  |          |       |    |
| KITH_HUMAN  | TK1      | Thymidine kinase, cytosolic                                              | 4.89E-04 | 0.51 | 2  |          |       |    |
| NDUS6_HUMAN | NDUS6    | NADH dehydrogenase [ubiquinone] iron-sulfur protein 6, mitochondrial     | 5.24E-05 | 0.51 | 3  |          |       |    |
| LRC8A_HUMAN | LRR8A    | Volume-regulated anion channel subunit LRR8A                             | 3.12E-03 | 0.50 | 2  |          |       |    |
| MCCB_HUMAN  | MCCC2    | Methylcrotonyl-CoA carboxylase beta chain, mitochondrial                 | 1.79E-05 | 0.50 | 4  |          |       |    |
| UFO_HUMAN   | AXL      | Tyrosine-protein kinase receptor UFO                                     | 1.26E-04 | 0.49 | 2  |          |       |    |
| GAPR1_HUMAN | GLIPR2   | Golgi-associated plant pathogenesis-related protein 1                    | 1.39E-08 | 0.48 | 4  |          |       |    |
| ATP5D_HUMAN | ATP5D    | ATP synthase subunit delta, mitochondrial                                | 3.70E-05 | 0.48 | 3  |          |       |    |
| GBB4_HUMAN  | GNB4     | Guanine nucleotide-binding protein subunit beta-4                        | 1.94E-05 | 0.48 | 5  |          |       |    |
| GBB1_HUMAN  | GNB1     | Guanine nucleotide-binding protein G(i)/G(s)/G(t) subunit beta-1         | 2.47E-07 | 0.47 | 6  | 1.15E-04 | 0.65  | 6  |
| SH3L3_HUMAN | SH3BGR1  | SH3 domain-binding glutamic acid-rich-like protein 3                     | 9.21E-05 | 0.47 | 2  |          |       |    |
| NSUN2_HUMAN | NSUN2    | tRNA (cytosine(34)-C(5))-methyltransferase                               | 6.12E-05 | 0.46 | 3  |          |       |    |
| SYFA_HUMAN  | FARSA    | Phenylalanine--tRNA ligase alpha subunit                                 | 1.45E-05 | 0.46 | 3  |          |       |    |
| TBCA_HUMAN  | TBCA     | Tubulin-specific chaperone A                                             | 2.65E-05 | 0.46 | 3  |          |       |    |
| OSBP1_HUMAN | OSBP     | Oxysterol-binding protein 1                                              | 3.26E-05 | 0.45 | 2  |          |       |    |
| ACTBL_HUMAN | ACTBL2   | Beta-actin-like protein 2                                                | 6.93E-05 | 0.44 | 5  | 1.43E-03 | 0.53  | 3  |
| AP3D1_HUMAN | AP3D1    | AP-3 complex subunit delta-1                                             | 8.22E-05 | 0.42 | 2  |          |       |    |
| PLXA2_HUMAN | PLXNA2   | Plexin-A2                                                                | 6.37E-06 | 0.41 | 5  |          |       |    |
| RS17L_HUMAN | RPS17    | 40S ribosomal protein S17-like                                           | 1.32E-03 | 0.40 | 4  | 1.53E-05 | 1.75  | 5  |
| KAD2_HUMAN  | AK2      | Adenylate kinase 2, mitochondrial                                        | 4.75E-07 | 0.40 | 2  |          |       |    |
| HMGA1_HUMAN | HMGA1    | High mobility group protein HMG-/HMG-Y                                   | 9.96E-05 | 0.39 | 2  | 1.01E-04 | 2.70  | 2  |
| 1433T_HUMAN | YWHAQ    | 14-3-3 protein theta                                                     | 1.86E-05 | 0.37 | 2  |          |       |    |
| DJC13_HUMAN | DNAJC13  | Dnaj homolog subfamily C member 13                                       | 6.24E-05 | 0.36 | 3  |          |       |    |
| NIPS1_HUMAN | NIPSNAP1 | Protein NipSnap homolog 1                                                | 1.22E-04 | 0.35 | 2  |          |       |    |
| NNTM_HUMAN  | NNT      | NAD(P) transhydrogenase, mitochondrial                                   | 1.37E-06 | 0.34 | 3  |          |       |    |
| IF4H_HUMAN  | EIF4H    | Eukaryotic translation initiation factor 4H                              | 5.24E-03 | 0.34 | 2  |          |       |    |
| RUXGL_HUMAN | SNRPGP15 | Putative small nuclear ribonucleoprotein G-like protein 15               | 4.14E-06 | 0.33 | 2  |          |       |    |
| GSTK1_HUMAN | GSTK1    | Glutathione S-transferase kappa 1                                        | 3.68E-04 | 0.31 | 2  |          |       |    |
| TTL12_HUMAN | TTL12    | Tubulin--tyrosine ligase-like protein 12                                 | 1.02E-06 | 0.31 | 2  |          |       |    |
| RAB1A_HUMAN | RAB1A    | Ras-related protein Rab-1A                                               | 1.54E-04 | 0.30 | 2  | 4.34E-06 | 4.16  | 2  |
| VPS35_HUMAN | VPS35    | Vacuolar protein sorting-associated protein 35                           | 7.23E-05 | 0.26 | 2  |          |       |    |
| K2C1_HUMAN  | KRT1     | Keratin, type II cytoskeletal 1                                          | 8.74E-07 | 0.25 | 4  | 1.13E-07 | 2.30  | 8  |
| DLG1_HUMAN  | DLG1     | Disks large homolog 1                                                    | 1.47E-04 | 0.24 | 2  | 4.30E-04 | 0.53  | 2  |
| K22E_HUMAN  | KRT2     | Keratin, type II cytoskeletal 2 epidermal                                | 3.28E-05 | 0.05 | 2  |          |       |    |
| TNAP3_HUMAN | TNFAIP3  | Tumor necrosis factor alpha-induced protein 3                            |          |      |    | 3.38E-03 | 10.69 | 2  |
| MARCS_HUMAN | MARCKS   | Myristoylated alanine-rich C-kinase substrate                            |          |      |    | 1.72E-04 | 7.96  | 3  |
| TCP4_HUMAN  | SUB1     | Activated RNA polymerase II transcriptional coactivator p15              |          |      |    | 1.13E-04 | 4.19  | 2  |
| K2C5_HUMAN  | KRT5     | Keratin, type II cytoskeletal 5                                          |          |      |    | 1.13E-03 | 3.75  | 2  |

|               |           |                                                                                               |          |      |    |
|---------------|-----------|-----------------------------------------------------------------------------------------------|----------|------|----|
| MRT4_HUMAN    | MRTO4     | mRNA turnover protein 4 homolog                                                               | 1.82E-06 | 3.62 | 2  |
| PYR1_HUMAN    | CAD       | CAD protein                                                                                   | 2.29E-03 | 3.46 | 2  |
| TCPH_HUMAN    | CCT7      | T-complex protein 1 subunit eta                                                               | 1.34E-04 | 3.39 | 3  |
| MOT1_HUMAN    | SLC16A1   | Monocarboxylate transporter 1                                                                 | 4.76E-04 | 3.21 | 3  |
| K1C10_HUMAN   | KRT10     | Keratin, type I cytoskeletal 10                                                               | 7.87E-05 | 3.13 | 4  |
| R39L5_HUMAN   | RPL39P5   | Putative 60S ribosomal protein L39-like 5                                                     | 4.73E-05 | 2.95 | 2  |
| SSRP1_HUMAN   | SSRP1     | FACT complex subunit SSRP1                                                                    | 1.71E-05 | 2.85 | 4  |
| RS24_HUMAN    | RPS24     | 40S ribosomal protein S24                                                                     | 7.20E-06 | 2.83 | 2  |
| H31_HUMAN     | HIST1H3A  | Histone H3.1                                                                                  | 5.94E-07 | 2.82 | 11 |
| H2AV_HUMAN    | H2AFV     | Histone H2A.V                                                                                 | 2.48E-06 | 2.61 | 3  |
| H2A1B_HUMAN   | HIST1H2AB | Histone H2A type 1-B/E                                                                        | 9.11E-07 | 2.60 | 2  |
| HNRH1_HUMAN   | HNRNPH1   | Heterogeneous nuclear ribonucleoprotein H                                                     | 1.20E-04 | 2.38 | 2  |
| TOP1_HUMAN    | TOP1      | DNA topoisomerase 1                                                                           | 3.51E-03 | 2.32 | 5  |
| SSBP_HUMAN    | SSBP1     | Single-stranded DNA-binding protein, mitochondrial                                            | 5.37E-05 | 2.28 | 3  |
| BST1_HUMAN    | BST1      | ADP-ribosyl cyclase/cyclic ADP-ribose hydrolase 2                                             | 5.77E-03 | 2.24 | 2  |
| H2AY_HUMAN    | H2AFY     | Core histone macro-H2A.1                                                                      | 1.76E-06 | 2.23 | 3  |
| PKHB2_HUMAN   | PLEKHB2   | Pleckstrin homology domain-containing family B member 2                                       | 3.91E-06 | 2.17 | 3  |
| BAF_HUMAN     | BANF1     | Barrier-to-autointegration factor                                                             | 2.54E-04 | 2.15 | 2  |
| RAP2B_HUMAN   | RAP2B     | Ras-related protein Rap-2b                                                                    | 6.25E-06 | 2.11 | 3  |
| RS30_HUMAN    | FAU       | 40S ribosomal protein S30                                                                     | 5.47E-05 | 2.10 | 2  |
| IST1_HUMAN    | IST1      | IST1 homolog                                                                                  | 2.39E-04 | 2.05 | 2  |
| RLA0_HUMAN    | RPLP0     | 60S acidic ribosomal protein P0                                                               | 9.71E-06 | 2.02 | 6  |
| H15_HUMAN     | HIST1H1B  | Histone H1.5                                                                                  | 4.27E-05 | 1.95 | 2  |
| DDX17_HUMAN   | DDX17     | Probable ATP-dependent RNA helicase DDX17                                                     | 1.30E-04 | 1.93 | 5  |
| S29A1_HUMAN   | SLC29A1   | Equilibrative nucleoside transporter 1                                                        | 5.03E-04 | 1.90 | 3  |
| TCPE_HUMAN    | CCT5      | T-complex protein 1 subunit epsilon                                                           | 6.74E-04 | 1.85 | 7  |
| CALM_HUMAN    | CALM1     | Calmodulin                                                                                    | 1.08E-03 | 1.84 | 2  |
| RCC2_HUMAN    | RCC2      | Protein RCC2                                                                                  | 2.93E-03 | 1.82 | 2  |
| ROA2_HUMAN    | HNRNPA2B1 | Heterogeneous nuclear ribonucleoproteins A2/B1                                                | 2.99E-03 | 1.82 | 2  |
| HNRPR_HUMAN   | HNRNPR    | Heterogeneous nuclear ribonucleoprotein R                                                     | 5.66E-05 | 1.75 | 2  |
| HNRPK_HUMAN   | HNRNPK    | Heterogeneous nuclear ribonucleoprotein K                                                     | 1.08E-03 | 1.75 | 2  |
| TRA2B_HUMAN   | TRA2B     | Transformer-2 protein homolog beta                                                            | 7.03E-05 | 1.74 | 3  |
| CDCP1_HUMAN   | CDCP1     | CUB domain-containing protein 1                                                               | 7.67E-06 | 1.74 | 4  |
| UGDH_HUMAN    | UGDH      | UDP-glucose 6-dehydrogenase                                                                   | 1.16E-03 | 1.71 | 2  |
| SRSF6_HUMAN   | SRSF6     | Serine/arginine-rich splicing factor 6                                                        | 2.14E-05 | 1.69 | 3  |
| EIF3C_HUMAN   | EIF3C     | Eukaryotic translation initiation factor 3 subunit C                                          | 7.27E-05 | 1.69 | 6  |
| COPA_HUMAN    | COPA      | Coatomer subunit alpha                                                                        | 7.01E-05 | 1.67 | 5  |
| FTH1_HUMAN    | FTH1      | Ferritin heavy chain                                                                          | 1.73E-03 | 1.65 | 2  |
| RS13_HUMAN    | RPS13     | 40S ribosomal protein S13                                                                     | 5.35E-05 | 1.64 | 5  |
| CTR1_HUMAN    | SLC7A1    | High affinity cationic amino acid transporter 1                                               | 3.17E-04 | 1.63 | 2  |
| FGF2_HUMAN    | FGF2      | Fibroblast growth factor 2                                                                    | 5.64E-03 | 1.62 | 2  |
| RINI_HUMAN    | RNH1      | Ribonuclease inhibitor                                                                        | 5.34E-04 | 1.62 | 2  |
| RL32_HUMAN    | RPL32     | 60S ribosomal protein L32                                                                     | 2.71E-05 | 1.60 | 2  |
| EIF3B_HUMAN   | EIF3B     | Eukaryotic translation initiation factor 3 subunit B                                          | 4.78E-04 | 1.60 | 3  |
| ILK_HUMAN     | ILK       | Integrin-linked protein kinase                                                                | 7.59E-04 | 1.57 | 3  |
| FETUA_HUMAN   | AHSG      | Alpha-2-HS-glycoprotein                                                                       | 4.90E-03 | 1.57 | 3  |
| VIME_HUMAN    | VIM       | Vimentin                                                                                      | 1.02E-05 | 1.56 | 9  |
| PAI1_HUMAN    | SERPINE1  | Plasminogen activator inhibitor 1                                                             | 8.66E-05 | 1.56 | 2  |
| PFKAP_HUMAN   | PFKP      | ATP-dependent 6-phosphofructokinase, platelet type                                            | 9.59E-04 | 1.55 | 2  |
| RAN_HUMAN     | RAN       | GTP-binding nuclear protein Ran                                                               | 1.87E-04 | 1.54 | 5  |
| FASN_HUMAN    | FASN      | Fatty acid synthase                                                                           | 4.74E-05 | 1.54 | 13 |
| TCPO_HUMAN    | CCT8      | T-complex protein 1 subunit theta                                                             | 5.97E-04 | 1.53 | 3  |
| CLH1_HUMAN    | CLTC      | Clathrin heavy chain 1                                                                        | 6.01E-06 | 1.52 | 15 |
| ACLY_HUMAN    | ACLY      | ATP-citrate synthase                                                                          | 2.60E-05 | 1.51 | 7  |
| EHD1_HUMAN    | EHD1      | EH domain-containing protein 1                                                                | 6.15E-04 | 1.51 | 4  |
| NFIP1_HUMAN   | NDFIP1    | NEDD4 family-interacting protein 1                                                            | 4.98E-03 | 0.67 | 2  |
| IGSF8_HUMAN   | IGSF8     | Immunoglobulin superfamily member 8                                                           | 7.95E-05 | 0.67 | 8  |
| EVA1A_HUMAN   | EVA1A     | Protein eva-1 homolog A                                                                       | 8.35E-05 | 0.66 | 3  |
| SYNC_HUMAN    | NARS      | Asparagine--tRNA ligase, cytoplasmic                                                          | 1.39E-03 | 0.66 | 2  |
| CTGF_HUMAN    | CTGF      | Connective tissue growth factor                                                               | 6.21E-04 | 0.65 | 7  |
| PTK7_HUMAN    | PTK7      | Inactive tyrosine-protein kinase 7                                                            | 4.43E-05 | 0.65 | 5  |
| PKP2_HUMAN    | PKP2      | Plakophilin-2                                                                                 | 7.41E-04 | 0.65 | 5  |
| S12A2_HUMAN   | SLC12A2   | Solute carrier family 12 member 2                                                             | 2.60E-04 | 0.65 | 3  |
| CXA1_HUMAN    | GJA1      | Gap junction alpha-1 protein                                                                  | 1.28E-03 | 0.65 | 3  |
| TRFM_HUMAN    | MELTF     | Melanotransferrin                                                                             | 1.84E-03 | 0.64 | 3  |
| TSP4_HUMAN    | THBS4     | Thrombospondin-4                                                                              | 4.12E-05 | 0.63 | 2  |
| VP37C_HUMAN   | VP537C    | Vacuolar protein sorting-associated protein 37C                                               | 3.08E-03 | 0.63 | 2  |
| COPD_HUMAN    | ARCN1     | Coatomer subunit delta                                                                        | 1.30E-03 | 0.63 | 2  |
| SCAM3_HUMAN   | SCAMP3    | Secretory carrier-associated membrane protein 3                                               | 5.36E-04 | 0.62 | 4  |
| AKR1A1_HUMAN  | AKR1A1    | Alcohol dehydrogenase [NADP(+)]                                                               | 2.84E-03 | 0.62 | 2  |
| SH3B4_HUMAN   | SH3BP4    | SH3 domain-binding protein 4                                                                  | 4.06E-03 | 0.62 | 2  |
| TPP2_HUMAN    | TPP2      | Tripeptidyl-peptidase 2                                                                       | 3.32E-05 | 0.62 | 5  |
| FLOT2_HUMAN   | FLOT2     | Flotillin-2                                                                                   | 1.63E-04 | 0.62 | 3  |
| RASK_HUMAN    | KRAS      | GTPase KRas                                                                                   | 4.15E-05 | 0.60 | 2  |
| SMD2_HUMAN    | SNRPD2    | Small nuclear ribonucleoprotein Sm D2                                                         | 1.34E-03 | 0.59 | 2  |
| ZNF644_HUMAN  | ZNF644    | Zinc finger protein 644                                                                       | 1.16E-04 | 0.59 | 2  |
| ABI1_HUMAN    | ABI1      | Abl interactor 1                                                                              | 9.15E-04 | 0.58 | 2  |
| ZDHC5_HUMAN   | ZDHC5     | Palmitoyltransferase ZDHC5                                                                    | 4.08E-05 | 0.58 | 9  |
| STX7_HUMAN    | STX7      | Syntaxin-7                                                                                    | 2.51E-04 | 0.58 | 2  |
| LAMC1_HUMAN   | LAMC1     | Laminin subunit gamma-1                                                                       | 1.11E-04 | 0.58 | 18 |
| KIF5C_HUMAN   | KIF5C     | Kinesin heavy chain isoform 5C                                                                | 3.27E-03 | 0.57 | 2  |
| COSA1_HUMAN   | COL5A1    | Collagen alpha-1(V) chain                                                                     | 3.35E-06 | 0.57 | 4  |
| VINC_HUMAN    | VCL       | Vinculin                                                                                      | 2.77E-06 | 0.57 | 4  |
| MRC2_HUMAN    | MRC2      | C-type mannose receptor 2                                                                     | 1.71E-04 | 0.57 | 2  |
| PLXA1_HUMAN   | PLXA1     | Plexin-A1                                                                                     | 1.24E-03 | 0.56 | 2  |
| CO9_HUMAN     | C9        | Complement component C9                                                                       | 2.60E-04 | 0.56 | 2  |
| EVA1B_HUMAN   | EVA1B     | Protein eva-1 homolog B                                                                       | 2.34E-05 | 0.56 | 2  |
| MYCT1_HUMAN   | MYCT1     | Myc target protein 1                                                                          | 1.64E-06 | 0.56 | 4  |
| SMCA5_HUMAN   | SMARCA5   | SWI/SNF-related matrix-associated actin-dependent regulator of chromatin subfamily A member 5 | 3.28E-05 | 0.55 | 3  |
| AT8B1_HUMAN   | ATP8B1    | Phospholipid-transporting ATPase 1C                                                           | 9.59E-04 | 0.55 | 2  |
| CACNA1E_HUMAN | CACNA1E   | Voltage-dependent R-type calcium channel subunit alpha-1E                                     | 7.95E-04 | 0.55 | 3  |
| GPC1_HUMAN    | GPC1      | Glypican-1                                                                                    | 1.24E-04 | 0.54 | 3  |
| PRS23_HUMAN   | PRSS23    | Serine protease 23                                                                            | 1.89E-05 | 0.53 | 4  |
| TSN5_HUMAN    | TSPAN5    | Tetraspanin-5                                                                                 | 7.21E-05 | 0.51 | 2  |
| SMC2_HUMAN    | SMC2      | Structural maintenance of chromosomes protein 2                                               | 4.54E-05 | 0.51 | 3  |
| SMOC1_HUMAN   | SMOC1     | SPARC-related modular calcium-binding protein 1                                               | 3.38E-05 | 0.50 | 3  |
| LAMA5_HUMAN   | LAMA5     | Laminin subunit alpha-5                                                                       | 3.83E-06 | 0.50 | 27 |



|              |           |                                                                      |          |      |    |
|--------------|-----------|----------------------------------------------------------------------|----------|------|----|
| SHRM2_HUMAN  | SHROOM2   | Protein Shroom2                                                      | 2.22E-05 | 0.50 | 3  |
| MB12A_HUMAN  | MVB12A    | Multivesicular body subunit 12A                                      | 3.79E-05 | 0.48 | 2  |
| B3A2_HUMAN   | SLC4A2    | Anion exchange protein 2                                             | 2.06E-03 | 0.48 | 3  |
| MINK1_HUMAN  | MINK1     | Misshapen-like kinase 1                                              | 2.89E-05 | 0.48 | 2  |
| FBLN1_HUMAN  | FBLN1     | Fibulin-1                                                            | 3.60E-06 | 0.48 | 4  |
| LRP1_HUMAN   | LRP1      | Prolow-density lipoprotein receptor-related protein 1                | 3.52E-05 | 0.48 | 8  |
| LAMB1_HUMAN  | LAMB1     | Laminin subunit beta-1                                               | 2.27E-07 | 0.48 | 18 |
| IL6RB_HUMAN  | IL6ST     | Interleukin-6 receptor subunit beta                                  | 1.88E-05 | 0.47 | 5  |
| NOTCH2_HUMAN | NOTCH2    | Neurogenic locus notch homolog protein 2                             | 2.34E-05 | 0.46 | 2  |
| PXDN_HUMAN   | PXDN      | Peroxidasin homolog                                                  | 2.18E-06 | 0.46 | 11 |
| ARRDC1_HUMAN | ARRDC1    | Arrestin domain-containing protein 1                                 | 3.21E-05 | 0.45 | 2  |
| CO1A2_HUMAN  | COL1A2    | Collagen alpha-2(I) chain                                            | 2.01E-04 | 0.45 | 3  |
| FN1_HUMAN    | FN1       | Fibronectin                                                          | 2.27E-07 | 0.43 | 73 |
| MPZL2_HUMAN  | MPZL2     | Myelin protein zero-like protein 2                                   | 1.57E-04 | 0.42 | 3  |
| LHPL2_HUMAN  | LHFPL2    | Lipoma HMGIC fusion partner-like 2 protein                           | 4.44E-05 | 0.42 | 2  |
| TR10B_HUMAN  | TNFRSF10B | Tumor necrosis factor receptor superfamily member 10B                | 4.70E-03 | 0.42 | 2  |
| CO1A1_HUMAN  | COL18A1   | Collagen alpha-1(XVIII) chain                                        | 5.94E-04 | 0.41 | 3  |
| K1C9_HUMAN   | KRT9      | Keratin, type I cytoskeletal 9                                       | 5.48E-04 | 0.40 | 7  |
| CJ076_HUMAN  | C10orf76  | UPF0668 protein C10orf76                                             | 3.08E-06 | 0.39 | 2  |
| M4K4_HUMAN   | MAP4K4    | Mitogen-activated protein kinase kinase kinase kinase 4              | 2.21E-05 | 0.38 | 7  |
| DMBT1_HUMAN  | DMBT1     | Deleted in malignant brain tumors 1 protein                          | 6.12E-06 | 0.36 | 2  |
| SRGN_HUMAN   | SRGN      | Serglycin                                                            | 2.27E-05 | 0.35 | 5  |
| LOXL2_HUMAN  | LOXL2     | Lysyl oxidase homolog 2                                              | 2.80E-06 | 0.34 | 4  |
| PGBM_HUMAN   | HSPG2     | Basement membrane-specific heparan sulfate proteoglycan core protein | 6.39E-07 | 0.34 | 39 |
| TOLIP_HUMAN  | TOLLIP    | Toll-interacting protein                                             | 1.89E-05 | 0.30 | 2  |
| NID1_HUMAN   | NID1      | Nidogen-1                                                            | 4.20E-06 | 0.29 | 7  |
| HNRPM_HUMAN  | HNRNPM    | Heterogeneous nuclear ribonucleoprotein M                            | 4.26E-04 | 0.25 | 2  |
| NID2_HUMAN   | NID2      | Nidogen-2                                                            | 1.63E-05 | 0.23 | 4  |
| COBA2_HUMAN  | COL11A2   | Collagen alpha-2(XI) chain                                           | 2.61E-04 | 0.20 | 3  |
| HTRA1_HUMAN  | HTRA1     | Serine protease HTRA1                                                | 6.24E-06 | 0.20 | 5  |
| FBLN3_HUMAN  | EFEMP1    | EGF-containing fibulin-like extracellular matrix protein 1           | 8.15E-06 | 0.19 | 3  |
| TINAL_HUMAN  | TINAGL1   | Tubulointerstitial nephritis antigen-like                            | 2.14E-06 | 0.16 | 7  |
| COR1A_HUMAN  | CORO1A    | Coronin-1A                                                           | 1.97E-04 | 0.08 | 2  |

| Precursor ion m/z | charge state | Peptide sequence                   | Accession   | Gene name |
|-------------------|--------------|------------------------------------|-------------|-----------|
| 542.3016          | 3            | TGAIVDVPVGEELLGR                   | ATPA_HUMAN  | ATP5A1    |
| 513.8007          | 2            | AVDSLVIPIGR                        | ATPA_HUMAN  | ATP5A1    |
| 751.6855          | 3            | QFYDQALQQAVVDDANNNAK               | CD81_HUMAN  | CD81      |
| 848.077           | 3            | TFHETLDCCGSSTLTALTTSVLK            | CD81_HUMAN  | CD81      |
| 526.2871          | 2            | DVLETFTVK                          | CD9_HUMAN   | CD9       |
| 590.3346          | 2            | KDVLETFTVK                         | CD9_HUMAN   | CD9       |
| 608.8197          | 2            | TQILEWAAER                         | EGLN_HUMAN  | EGN       |
| 842.9016          | 2            | GNCVSLSPSPGDPDR                    | EGLN_HUMAN  | EGN       |
| 540.8368          | 2            | LLGIETPLPK                         | ICAM1_HUMAN | ICAM      |
| 725.3444          | 2            | ASVSVTAEDGQTQR                     | ICAM1_HUMAN | ICAM      |
| 402.7399          | 2            | LFGLAQR                            | NFKB2_HUMAN | NFKB2     |
| 701.8077          | 2            | DSGEEAAEPSAPSR                     | NFKB2_HUMAN | NFKB2     |
| 433.9221          | 3            | TSEVDLAKPLVK                       | PDC6I_HUMAN | PDCD6IP   |
| 1081.484          | 2            | FIQQTYPSGGEEQAQYCR                 | PDC6I_HUMAN | PDCD6IP   |
| 542.8217          | 2            | ALAAVLEELR                         | PTX3_HUMAN  | PTX3      |
| 715.8961          | 2            | LTSALDELLQATR                      | PTX3_HUMAN  | PTX3      |
| 525.6055          | 3            | SIGSAVDQGNESIVAK                   | RGAP1_HUMAN | RACGAP1   |
| 505.2693          | 2            | GLTETGLYR                          | RGAP1_HUMAN | RACGAP1   |
| 403.2084          | 3            | DSTGHVGFIFK                        | SDCB1_HUMAN | SDCB1     |
| 800.1078          | 3            | SIDNGIFVQLVQANSPASLVGLR            | SDCB1_HUMAN | SDCB1     |
| 1177.6057         | 3            | VIQAQTAFSANPANPAILSEASAPIPHDGNLYPR | SDCB1_HUMAN | SDCB1     |
| 762.3794          | 3            | LYPWGVVEVENPEHNDFLK                | SEPT2_HUMAN | SEPT2     |
| 757.3803          | 2            | TIISYIDEQFER                       | SEPT2_HUMAN | SEPT2     |
| 581.9653          | 3            | AIWNVINWENVTER                     | SODM_HUMAN  | SOD2      |
| 712.909           | 2            | GDVTAQIALQPALK                     | SODM_HUMAN  | SOD2      |
| 579.6128          | 3            | FHDLLSQLDDQYSR                     | STAT1_HUMAN | STAT1     |
| 680.8772          | 2            | ELSAVTFPDIIR                       | STAT1_HUMAN | STAT1     |
| 751.3383          | 2            | SLEDLQDEYDFK                       | STAT1_HUMAN | STAT1     |
| 494.7747          | 2            | SLTLDVQGR                          | VCAM1_HUMAN | VCAM1     |
| 580.3195          | 2            | NTVISVNPSTK                        | VCAM1_HUMAN | VCAM1     |
| 824.4456          | 2            | SLEVTFTPVIEDIGK                    | VCAM1_HUMAN | VCAM1     |
